# Supplementary material for: Improving the patient-centred care of children with life-altering skin conditions using feedback from electronic patient-reported outcome measures: protocol for a hybrid effectiveness-implementation study (PEDS-ePROM)
Source: PubMed Central journal article supplement — BMJ Open. 2021 Apr 9;11(4):e041861. doi: 10.1136/bmjopen-2020-041861 (PMC8043009; doi:10.1136/bmjopen-2020-041861), 2021-04-09
Supplement: bmjopen-2020-041861.draft_revisions.pdf [file bmjopen-2020-041861.draft_revisions.pdf]

# BMJ Open

BMJ Open is committed to open peer review. As part of this commitment we make the peer review history of every article we publish publicly available.

When an article is published we post the peer reviewers' comments and the authors' responses online. We also post the versions of the paper that were used during peer review. These are the versions that the peer review comments apply to.

The versions of the paper that follow are the versions that were submitted during the peer review process. They are not the versions of record or the final published versions. They should not be cited or distributed as the published version of this manuscript.

BMJ Open is an open access journal and the full, final, typeset and author-corrected version of record of the manuscript is available on our site with no access controls, subscription charges or pay-per-view fees (<http://bmjopen.bmj.com>).

If you have any questions on BMJ Open's open peer review process please email [info.bmjopen@bmj.com](mailto:info.bmjopen@bmj.com)

# BMJ Open

## Improving the patient-centred care of children with life-altering skin conditions using feedback from electronic patient-reported outcome measures: Protocol for a hybrid effectiveness-implementation study (PEDS-ePROM)

|                               |                                                                                                                                                                                                                                                                                                                                                                                                                                                                                                                                                                                                                                                                                                                                                                                                                                                                                                                              |
|-------------------------------|------------------------------------------------------------------------------------------------------------------------------------------------------------------------------------------------------------------------------------------------------------------------------------------------------------------------------------------------------------------------------------------------------------------------------------------------------------------------------------------------------------------------------------------------------------------------------------------------------------------------------------------------------------------------------------------------------------------------------------------------------------------------------------------------------------------------------------------------------------------------------------------------------------------------------|
| Journal:                      | <i>BMJ Open</i>                                                                                                                                                                                                                                                                                                                                                                                                                                                                                                                                                                                                                                                                                                                                                                                                                                                                                                              |
| Manuscript ID                 | bmjopen-2020-041861                                                                                                                                                                                                                                                                                                                                                                                                                                                                                                                                                                                                                                                                                                                                                                                                                                                                                                          |
| Article Type:                 | Protocol                                                                                                                                                                                                                                                                                                                                                                                                                                                                                                                                                                                                                                                                                                                                                                                                                                                                                                                     |
| Date Submitted by the Author: | 19-Jun-2020                                                                                                                                                                                                                                                                                                                                                                                                                                                                                                                                                                                                                                                                                                                                                                                                                                                                                                                  |
| Complete List of Authors:     | <p>Tyack, Zephania; The University of Queensland, Centre for Children's Burns and Trauma Research, Child Health Research Centre; Queensland Children's Hospital</p> <p>Simons, Megan; The University of Queensland, Centre for Children's Burns and Trauma Research, Child Health Research Centre; Queensland Children's Hospital, Department of Occupational Therapy</p> <p>McPhail, Steven; Queensland University of Technology, School of Public Health and Social Work and Institute of Health and Biomedical Innovation</p> <p>Harvey, Gillian; The University of Adelaide, Adelaide Nursing School</p> <p>Zappala, Tania; Queensland Children's Hospital</p> <p>Ware, Robert; Griffith University - GC Campus, Menzies Health Institute Queensland</p> <p>Kimble, Roy; The University of Queensland, Centre for Children's Burns and Trauma Research, Child Health Research Centre; Queensland Children's Hospital</p> |
| Keywords:                     | <p>PAEDIATRICS, Change management &lt; HEALTH SERVICES ADMINISTRATION &amp; MANAGEMENT, Paediatric dermatology &lt; DERMATOLOGY, Telemedicine &lt; BIOTECHNOLOGY &amp; BIOINFORMATICS</p>                                                                                                                                                                                                                                                                                                                                                                                                                                                                                                                                                                                                                                                                                                                                    |
|                               |                                                                                                                                                                                                                                                                                                                                                                                                                                                                                                                                                                                                                                                                                                                                                                                                                                                                                                                              |

SCHOLARONE™  
Manuscripts

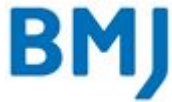

I, the Submitting Author has the right to grant and does grant on behalf of all authors of the Work (as defined in the below author licence), an exclusive licence and/or a non-exclusive licence for contributions from authors who are: i) UK Crown employees; ii) where BMJ has agreed a CC-BY licence shall apply, and/or iii) in accordance with the terms applicable for US Federal Government officers or employees acting as part of their official duties; on a worldwide, perpetual, irrevocable, royalty-free basis to BMJ Publishing Group Ltd ("BMJ") its licensees and where the relevant Journal is co-owned by BMJ to the co-owners of the Journal, to publish the Work in this journal and any other BMJ products and to exploit all rights, as set out in our [licence](#).

The Submitting Author accepts and understands that any supply made under these terms is made by BMJ to the Submitting Author unless you are acting as an employee on behalf of your employer or a postgraduate student of an affiliated institution which is paying any applicable article publishing charge ("APC") for Open Access articles. Where the Submitting Author wishes to make the Work available on an Open Access basis (and intends to pay the relevant APC), the terms of reuse of such Open Access shall be governed by a Creative Commons licence – details of these licences and which [Creative Commons](#) licence will apply to this Work are set out in our licence referred to above.

Other than as permitted in any relevant BMJ Author's Self Archiving Policies, I confirm this Work has not been accepted for publication elsewhere, is not being considered for publication elsewhere and does not duplicate material already published. I confirm all authors consent to publication of this Work and authorise the granting of this licence.

1  
2  
3 **TITLE: Improving the patient-centred care of children with life-altering skin**  
4 **conditions using feedback from electronic patient-reported outcome**  
5 **measures: Protocol for a hybrid effectiveness-implementation study (PEDS-**  
6 **ePROM)**  
7  
8  
9

10  
11 Dr Zephania Tyack <sup>1,2,5\*</sup>, Dr Megan Simons <sup>1,2</sup>, Professor Steven M McPhail <sup>5</sup>,  
12 Professor Gill Harvey <sup>3,6</sup> Dr Tania Zappala <sup>2</sup>, Professor Robert S Ware <sup>4</sup>, Professor  
13 Roy Kimble <sup>1,2,6</sup>  
14  
15  
16

17  
18  
19 <sup>1</sup>The University of Queensland, Centre for Children's Burns and Trauma Research,  
20 Child Health Research Centre, St Lucia, QLD, Australia 4072.  
21

22 <sup>2</sup>Queensland Children's Hospital, 501 Stanley St, South Brisbane, QLD, Australia  
23 4101.  
24

25 <sup>3</sup>Adelaide Nursing School, Adelaide Health & Medical Sciences Building, Level 6,  
26 Corner North Terrace & George Street, The University of Adelaide, South Australia  
27 5005 Australia.  
28

29  
30 <sup>4</sup>Menzies Health Institute Queensland, Griffith University, Southport, QLD, Australia  
31 4222.  
32

33  
34 <sup>5</sup>School of Public Health and Social Work and Institute of Health and Biomedical  
35 Innovation, Queensland University of Technology, 149 Victoria Park Rd, Kelvin  
36 Grove, QLD, Australia 4059.  
37

38  
39 <sup>6</sup>Centre for Children's Burns and Trauma Research, Queensland University of  
40 Technology, 149 Victoria Park Rd, Kelvin Grove, QLD, Australia 4059.  
41  
42

43  
44 \*Corresponding author

45 Dr Zephania Tyack

46 Children's Health Research Centre,

47 62 Graham St, South Brisbane, QLD, Australia 4101.

48 Email: [z.tyack@uq.edu.au](mailto:z.tyack@uq.edu.au)  
49  
50  
51

52  
53  
54  
55 Word count 3932  
56  
57  
58  
59  
60

1  
2  
3 **TITLE: Improving the patient-centred care of children with life-altering skin**  
4 **conditions using an electronic patient-reported feedback intervention (PEDS-**  
5 **ePROM): Protocol for a type 2 hybrid effectiveness-implementation study**  
6  
7  
8  
9  
10  
11

12 **ABSTRACT**

13  
14 **Introduction**

15  
16  
17 Using patient-reported outcome measures (PROMs) with children have been  
18 described as 'giving a voice to the child'. Few studies have examined the routine use  
19 of these measures as potentially therapeutic interventions with children. The study  
20 aim is to investigate: (1) the *effectiveness* of a patient-centred care intervention using  
21 feedback from electronic PROMs (PEDS-ePROM intervention) on health outcomes,  
22 referrals, and treatment satisfaction; and (2) the *implementation* of PEDS-ePROM by  
23 assessing acceptability and sustainability of the intervention and study processes.  
24  
25  
26  
27  
28  
29  
30  
31  
32

33 **Methods and analysis**

34  
35 A hybrid II effectiveness-implementation study will be conducted from February 2020  
36 with children with life-altering skin conditions attending two outpatient clinics at a  
37 specialist paediatric children's hospital. A pragmatic randomised controlled trial and  
38 mixed methods process evaluation will be completed. Randomisation will occur at  
39 the child participant level. Children or caregiver proxies completing baseline PROMs  
40 will be randomised to: (1) completion of PROMs plus graphical displays of PROM  
41 results to treating clinicians in consultations, versus (2) completion of PROMs  
42 without graphical display of PROM results. The primary outcome of the effectiveness  
43 trial will be overall health-related quality of life of children using caregiver-proxy  
44 report (children < 8 years) and child-report ( $\geq 8$  years). Secondary outcomes will  
45 include other health-related quality of life outcomes (e.g., psychosocial health of  
46  
47  
48  
49  
50  
51  
52  
53  
54  
55  
56  
57  
58  
59  
60

1  
2  
3 children and caregivers), referrals, hospital resource use and treatment satisfaction.  
4  
5 Trial data will be primarily analysed using mixed-effects regression. Analysis of the  
6  
7 implementation component will involve inductive thematic analysis of interview data,  
8  
9 meeting minutes, observational field notes and written study communication mapped  
10  
11 to the Consolidated Framework for Implementation Research.  
12  
13  
14  
15  
16

### 17 **Ethics and dissemination**

18  
19 Ethical approval was obtained from Children's Health Queensland Human Research  
20  
21 Ethics Committee (HREC/2019/QCHQ/56290), The University of Queensland  
22  
23 (2019002233), and Queensland University of Technology (1900000847).  
24  
25

26 Dissemination will occur through stakeholder groups, scientific meetings and peer-  
27  
28 reviewed publications.  
29  
30  
31  
32

### 33 **Trial registration**

34  
35 ACTRN12620000174987  
36  
37

### 38 **Keywords**

39  
40  
41 Patient-reported outcome measures, quality of life, paediatrics, patient-centred care,  
42  
43 implementation  
44  
45  
46  
47  
48  
49  
50  
51  
52  
53  
54  
55  
56  
57  
58  
59  
60

## ARTICLE SUMMARY

### Strengths and limitations of this study

- New evidence of the effectiveness and implementation of patient-reported outcome measures in the routine clinical care of children and caregivers with skin conditions will be generated which has received limited attention.
- Stakeholders representing multiple perspectives (children, caregivers, health professionals) were involved in the development of the intervention and process evaluation.
- Lack of ability to blind participants to the outcomes and contamination of the control group are potential biases.

## INTRODUCTION

The routine use of patient-reported outcome measures (PROMs), or proxy-report measures, as part of routine clinical care has been identified as a means of driving change in healthcare systems, to ensure the unique voice of the patient is heard [1,2]. Potential benefits are improvements in shared decision-making, communication with health professionals and adherence to recommended treatments [3]. PROMs are defined as questionnaires completed by a patient with a health condition about their own health and treatment. For the purposes of the current study, PROMs include proxy caregiver measures as young children cannot self-report their quality of life or symptoms.

A recent systematic review identified that the effectiveness of PROM interventions for people with health conditions compared to usual care has been positive in adequately powered studies [4]. Few trials have been conducted in children. Only 2 of 22 included randomised controlled trials were conducted in children, one focussed on children with diabetes and one on children with cancer [5,6]. Two more recent paediatric cluster randomised controlled trials investigated PROMs used with children with severe mental health conditions attending child and adolescent psychiatric services [7,8]. Only one of the four paediatric trials identified positive effects of the PROM intervention. The positive effects were for psychosocial health-related quality of life but not physical health-related quality of life in children with diabetes [5].

This paper will report the protocol for a randomised controlled trial and implementation study to test the effectiveness, acceptability and sustainability of a



1  
2  
3 PROM intervention in children with the life-altering skin conditions of burn scars and  
4  
5 infantile haemangiomas. The need for interventions to improve the health-related  
6  
7 quality of life of these children is highlighted by the lower health-related quality of life  
8  
9 of children with burn scars across multiple domains even years after the actual injury  
10  
11 compared to children with cancer [9]. At the time of publication, the PROM  
12  
13 intervention to be tested had been designed (termed PEDS-ePROM) and the  
14  
15 randomised controlled trial and implementation testing was underway with no  
16  
17 findings yet available.  
18  
19  
20

## 21 **Aims and objectives**

### 22 Effectiveness outcomes

23  
24 The primary effectiveness aim is to determine the short-term effectiveness of  
25  
26 implementing PROMs with graphical displays of result summaries, on overall health-  
27  
28 related quality of life of children with life-altering skin conditions. Secondary aims will  
29  
30 be to examine the effectiveness of the intervention for other health-related quality of  
31  
32 life outcomes of children and caregivers, the number and type of referrals to health  
33  
34 professionals and treatment satisfaction.  
35  
36  
37  
38  
39

### 40 *Hypotheses (effectiveness component)*

- 41  
42
- 43 1. The PEDS-ePROM intervention will lead to effect estimates from generic health-  
44 related quality of life measures in a consistent direction and have a similar strength  
45 of effect across the clinic and conditions, supporting comparative effectiveness of  
46 the intervention.  
47
  - 48 2. The PEDS-ePROM intervention will have a greater effect on overall health-related  
49 quality of life than the ePROM intervention.  
50  
51  
52  
53  
54  
55  
56

### 57 Implementation outcomes

58  
59  
60

1  
2  
3 The primary implementation aim is to determine the short-term acceptability and  
4 sustainability of implementing the interventions.  
5  
6

## 7 **METHODS AND ANALYSIS**

### 8 **Development of the study design and intervention**

9  
10 The development of the PEDS-ePROM trial and intervention was conducted from  
11 May 2019 to January 2020. We initiated preliminary discussion with clinicians in  
12 clinical areas to identify which measures were already being used routinely in  
13 practice. Systematic reviews and paediatric literature regarding the use of PROMs  
14 were also reviewed. Interview guides were developed to identify health outcomes  
15 that are meaningful and of high priority to children, their families and health  
16 professionals in the PROM intervention [10]. The nine core questions from the  
17 International Society of Quality of Life (ISOQOL) user guide and the companion  
18 guide areas were addressed in the interviews [11]. This strategy has been identified  
19 as important to improve the engagement of children and young people such that  
20 fewer items are missed and responses accurately reflect their experiences and  
21 cognitive ability [12].  
22  
23  
24  
25  
26  
27  
28  
29  
30  
31  
32  
33  
34  
35  
36  
37  
38  
39  
40  
41  
42  
43  
44  
45  
46  
47  
48  
49  
50  
51  
52  
53  
54  
55  
56  
57  
58  
59  
60

Interviews were conducted with children with life-altering skin conditions, their  
caregivers and treating health professionals in two phases as part of the pre-  
implementation planning, with interview questions mapped to the Consolidated  
Framework for Implementation Research. In the first phase the most appropriate  
outcomes and PROMs were identified. In the second phase the content validity of  
chosen PROMs was confirmed. Potential barriers and benefits to implementation  
were identified in both phases. For children with burn scars and their families,  
measures of health-related quality of life specific to scarring were prioritised to

1  
2  
3 include symptoms and treatment burden based on conceptual work from the  
4  
5 research team that identified these aspects as central components of health-related  
6  
7 quality of life for this group [13]. Theory-based interventions also tend to be more  
8  
9 effective than non-theory based interventions [14]. The design of the randomised  
10  
11 controlled trial was based on systematic review findings that identified greater  
12  
13 benefits when PROM results were provided to clinicians compared to when results  
14  
15 were not provided to clinicians [4].  
16  
17

### 18 19 **PEDS-ePROM intervention**

20  
21 The Pediatric Quality of Life Inventory infant and generic scales [15,16] measuring  
22  
23 health-related quality of life and a treatment satisfaction item were included as  
24  
25 generic measures. Condition-specific health-related quality of life measures selected  
26  
27 were the Brisbane Burn Scar Impact Profile [13,17], The CARE parent scale [18],  
28  
29 Hemangioma Family Burden questionnaire [19] and Infantile Hemangioma Quality of  
30  
31 Life Scale [20]. Selected measures targeted children and their caregivers and a  
32  
33 single item targeted siblings. An open-ended option was also available for child and  
34  
35 caregiver participants to report their priorities for care. Only PROMs meeting the  
36  
37 criteria of content validity supported by involvement of the target group in  
38  
39 development were included. Graphical displays of result summaries from the  
40  
41 Pediatric Quality of Life Inventory and condition-specific measures of health-related  
42  
43 quality of life measure will be presented in consultations for children with skin  
44  
45 conditions and their caregivers to treating clinicians. The components of the  
46  
47 intervention are reported in Table 1.  
48  
49  
50  
51  
52  
53  
54  
55  
56  
57  
58  
59  
60

Table 1. Description of the PEDS-ePROM intervention and ePROM comparison intervention\*

| Clinic           | Mode of administration                                                                                                                                                                     | PEDS-ePROM intervention                                   |                                                                                                                                                                                            |                                                                                           | ePROM comparison intervention                                                                                           |                                                                                                           |                                | Intervention period |
|------------------|--------------------------------------------------------------------------------------------------------------------------------------------------------------------------------------------|-----------------------------------------------------------|--------------------------------------------------------------------------------------------------------------------------------------------------------------------------------------------|-------------------------------------------------------------------------------------------|-------------------------------------------------------------------------------------------------------------------------|-----------------------------------------------------------------------------------------------------------|--------------------------------|---------------------|
|                  |                                                                                                                                                                                            | Content                                                   | Duration                                                                                                                                                                                   | Frequency                                                                                 | Content                                                                                                                 | Duration                                                                                                  | Frequency                      |                     |
| Burn scar clinic | Administered remotely using email or by a research occupational therapist in the clinic setting. PROM data collected electronically on a device at home or on an Apple iPad in the clinic. | PEDS-QL generic and infant scales<br>BBSIP<br>CARE scales | Approx. 15 mins for child and caregiver participants to complete ePROMs prior consultations. Up to 15 mins to download, print and deliver ePROMs & graphical displays to consultations***. | Delivered in consultations up to 1x/mth. Based on usual care likely to be delivered 2-3x. | ePROMs delivered and completed as per PEDS-ePROM intervention group. No graphical summaries provided in consultations‡. | Approximately 15 mins for child and caregiver participants to complete ePROMs prior to each consultation. | As per PEDS-ePROM intervention | Baseline - 6 mths † |
| Vascular clinic  | As per burn scar clinic                                                                                                                                                                    | PEDS-QL infant scales                                     | Approx. 10 mins for caregiver participants to                                                                                                                                              | Up to 1x/mth, likely 1-2x **.                                                             | ePROMs delivered and completed as                                                                                       | Approximately 10 mins for child and                                                                       | As per PEDS-                   | Baseline - 6 mths † |

1  
2  
3  
4  
5  
6  
7  
8  
9  
10  
11  
12  
13  
14  
15  
16  
17  
18  
19  
20  
21  
22  
23  
24  
25  
26  
27  
28  
29  
30  
31  
32  
33  
34  
35  
36  
37  
38  
39  
40  
41  
42  
43  
44  
45  
46

|                 |                   |                 |                 |              |
|-----------------|-------------------|-----------------|-----------------|--------------|
| Hemangioma      | complete          | per PEDS-       | caregiver       | ePROM        |
| Family Burden   | ePROMs prior to   | ePROM           | participants to | intervention |
| questionnaire   | each              | intervention    | complete        |              |
| Infantile       | consultation.     | group. No       | ePROMs prior    |              |
| Haemangioma     | Up to 10 mins to  | graphical       | to each         |              |
| Quality-of-Life | download, print   | summaries       | consultation.   |              |
| Instrument      | and deliver       | provided in     |                 |              |
|                 | ePROMs &          | consultations‡. |                 |              |
|                 | graphical         |                 |                 |              |
|                 | displays to       |                 |                 |              |
|                 | consultations***. |                 |                 |              |

\* Based on the Template for Intervention Description and Replication (TIDieR) guidelines

† Post-baseline

‡ Graphical summaries provided to child and caregiver participants and entered into medical records at the end of the study

\*\* Children with ulcerated haemangiomas may receive intervention more frequently

\*\*\* Graphical summaries provided to child and caregiver participants at the end of the study

PROM, patient-reported outcome measure; ePROMs, electronic patient-reported outcome measures; PEDS-QL, Pediatric Evaluation of Quality of Life Inventory; approx., approximately; mins, minutes; mth, months

## Method for completing PROMs

Electronically-delivered PROMs were identified as the best option for getting patients to complete the measures at home prior to consultations to reduce the burden of administration of measures and result summaries during busy clinics. The PROMs will be administered via a weblink sent to caregiver participants in an email in the three days prior to their appointment. If the questionnaires are not completed via the weblink, child and caregiver participants will be offered a further opportunity to complete the questionnaires using an iPad up to 30 minutes prior to their consultation at the outpatient clinic while they are waiting for their consultation. Phone calls will be used to remind caregiver participants to complete the PROMs. The PROMs and graphical display of result summaries will be generated using the online survey software program Qualtrics<sup>XM</sup> [21] and presented to treating health professionals immediately prior to appointments. Copies of the electronically completed PROMs and graphical displays of result summaries will be stored in medical records.

## Context

The setting will be two outpatient clinics at a major metropolitan quaternary-level children's hospital in Australia; a burns clinic and a vascular anomalies clinic. Caregivers (or their children with skin conditions if aged 8 years or older) will be consecutively approached and recruited, and the intervention delivered prior to and at these clinics. The catchment of the hospital includes inhabitants from rural, regional and metropolitan areas including those from surrounding islands. Recruitment commenced in January 2019. The first participant was randomised to receive the intervention in March 2020.

## Research design

A hybrid type 2 effectiveness-implementation design will be used which blends evaluating intervention effectiveness and understanding implementation of the intervention simultaneously [22]. Benefits of this design include reduced lag time for uptake of the results into routine clinical practice and understanding the barriers and benefits to implementation [22]. A pragmatic two-arm randomised controlled trial will be conducted using block randomisation in random blocks of 4, 6 or 8 stratified by clinic, with child participants as the unit of randomisation; and an embedded qualitative process evaluation involving interviews with clinicians, and child and caregiver participants. The randomisation sequence will be prepared by statistician independent from the study and will be concealed using sequentially numbered, opaque, sealed envelopes with tamper proof tape prepared by a person independent from the study.

The randomised controlled trial arms will be: (1) PROM completion plus graphical display of result summaries to clinicians (intervention group) versus; (2) PROM completion without graphical display of result summaries to clinicians (comparison group).

Baseline PROM measurement will occur before randomisation. PROM measurement will occur prior to or at one or more subsequent hospital appointments over the following 6-months and follow-up measurement will occur at 3-months and 6-months post-baseline if these timepoints differ from data collection timepoints during consultations with health professionals. Child and caregiver participants will be masked to the hypotheses. A Standard Protocol Items Recommendations for

1  
2  
3  
4  
5  
6  
7  
8  
9  
10  
11  
12  
13  
14  
15  
16  
17  
18  
19  
20  
21  
22  
23  
24  
25  
26  
27  
28  
29  
30  
31  
32  
33  
34  
35  
36  
37  
38  
39  
40  
41  
42  
43  
44  
45  
46  
47  
48  
49  
50  
51  
52  
53  
54  
55  
56  
57  
58  
59  
60

Interventional Trials (SPIRIT) flow diagram has been used to report the schedule for enrolment, interventions and evaluations for the effectiveness component of the study (Figure 1).

The study design and evaluation plan have been informed by the Consolidated Framework for Implementation Research which considers reasons for successful implementation or problems and can be used to understand the mechanism of action of the intervention. This framework also covers the physical and social environment, values, individual motivation and capacity factors which are considered important for the intervention being tested and has been derived from 33 theories relating to implementation [23]. This Protocol paper has been prepared following the eHealth Consolidated Standards of Reporting Trials (CONSORT) guidelines.

## Participants

### Inclusion criteria

Children with burn scars and infantile haemangiomas, aged 16 years or younger at the time of recruitment, who require ongoing management in the hospital setting, and their caregivers aged 18 years or older will be included. Ongoing management is defined as children who require one or more ongoing consultations beyond baseline for the prevention or management of skin conditions as determined by treating clinicians at baseline. Treating clinicians will also be asked to determine children's ability to complete PROMs electronically based on their physical condition and knowledge of the family (i.e., to determine if bilateral hand burns would prevent sufficient movement of their hands to use an iPad).

### Exclusion criteria



1  
2  
3 Children and caregivers will not be eligible to participate if they are involved with  
4 child protection services and it is difficult to obtain consent, where circumstances  
5 interfere with the participant's ability to give informed consent (i.e., diminished  
6 understanding or comprehension), or where there is difficulty speaking or  
7 understanding written English as the PROMs are only available for the study in  
8 English.  
9

### 16 Sample size estimate

17  
18 The sample size was based on recruitment feasibility. A retrospective audit of child  
19 and caregiver participants of clinic attendees suggested at least 35 participants in  
20 each clinic can be recruited in the 6-month intervention period. In terms of the  
21 effectiveness randomised controlled trial, if outcome data is available for 70  
22 participants overall, then with 80% power we will be able to detect an effect size for  
23 the difference between-arms of 0.68 or greater for overall health-related quality of life  
24 at 6-months post-baseline ( $\alpha=0.05$ ).  
25  
26  
27  
28  
29  
30  
31  
32  
33  
34  
35  
36  
37

38 Interviews will be conducted with the following groups during implementation with  
39 numbers of participants represented approximately equally for each clinic: children  
40 with a skin condition, their caregivers and treating health professionals. Interviews  
41 will continue until saturation (i.e. the point at which no further dimensions, nuances,  
42 or insights of issues are identified) [24] building on interview data generated pre-  
43 implementation. A greater number of child interviews will be required than caregiver  
44 and health professional interviews based on our previous experience obtaining  
45 shorter interviews of 15 to 20 minutes in children with burn scars than with  
46 caregivers and health professionals.  
47  
48  
49  
50  
51  
52  
53  
54  
55  
56  
57  
58  
59  
60

## Evaluation

### Effectiveness outcomes

Study outcomes will be self-completed by children aged 8 years or older and proxy-completed by caregivers for younger children. The primary outcome assessed will be change in the child's generic overall health across both clinics measured using The Pediatric Quality of Life Inventory (PedsQL™ 4.0 Generic Core and Infant Scales) [15,16] subscales of psychosocial, physical and overall health and the Child Health Utility (CHU-9D) [25]. Secondary outcomes will be: a) change in other health-related quality of life outcomes (e.g., child physical health, The Pediatric Quality of Life Inventory), child psychosocial health ( The Pediatric Quality of Life Inventory); b) resource use from the perspective of the health service based on the cost of implementing the intervention will be recorded for patients in each group. In addition, healthcare resource utilisation for co-interventions for skin treatment (e.g. medicines, complementary treatments, and details of hospital presentations), will be collected from several sources including medical records, and the hospital clinical costings department for corroboration and analysis; c) number and type of referrals for the child or caregiver; and d) caregiver satisfaction with treatment. A description of each of the outcomes and psychometric properties of outcomes are reported in Supplementary File 1. Adverse effects of the PROM interventions will be monitored using the self-report of caregiver and child participants (where appropriate), treating health professionals as well as by monitoring of the PROM data by investigators.

### Other outcomes

Sociodemographic data collected from or about caregivers will include the caregiver's relationship to the child, level of education, ethnicity, work status,

1  
2  
3 household income, and postcode; and from children aged 8 years or older or  
4 caregivers about their children will include, gender, ethnicity, education level, scar  
5 location and comorbidities of the child participants. Clinical data collected from  
6 electronic medical records will be percent total body surface area, percent full  
7 thickness burn, length of time post-burn, type of healing (e.g., spontaneous skin  
8 healing versus split thickness graft), type of burn, and length of time to re-  
9 epithelialisation, medications and complications during the study period.

### 19 Fidelity

20 Fidelity of the intervention will be records kept by researchers regarding the number  
21 of participants who completed ePROMs as scheduled, the number randomised to  
22 receive graphical displays of result summaries versus the number of participants  
23 who actually received graphical displays of result summaries during consultations,  
24 and missing PROM data on Qualtrics<sup>XM</sup> [21]. Immediately after face-to-face  
25 consultations caregivers and children (where appropriate) will be requested to  
26 verbally report the topics that were discussed during the consultation mapped to the  
27 graphical display of result summaries.

### 39 Effectiveness evaluation

40 An intention to treat analysis will be the primary approach but per protocol analyses  
41 will be compared to the intention to treat approach to examine the effect of those  
42 who didn't receive the intervention as intended. The key sociodemographic and  
43 clinical characteristic data that will be examined for baseline differences between the  
44 groups will be age, gender, education, household income, socioeconomic status of  
45 the neighbourhood where the family reside based on postcode, severity of baseline  
46 symptoms and health-related quality of life, body location of the condition, visibility of  
47 the condition (scars on the head, neck, face or hands), and time since the skin  
48  
49  
50  
51  
52  
53  
54  
55  
56  
57  
58  
59  
60

1  
2  
3 condition commenced or injury occurred. The primary comparison will be completed  
4  
5 using data from caregivers for children aged younger than 8-years and from children  
6  
7 themselves for those aged 8-years or older.  
8

#### 9 10 Effectiveness analysis

11  
12  
13 Primary outcome comparison at 6-month post-baseline will be based on overall health  
14  
15 from the Pediatric Evaluation of Quality of Life Inventory between the PEDS-ePROM  
16  
17 and ePROM comparison group using linear mixed-effects models that account for  
18  
19 repeated observations from the same child and clustering within clinics and within  
20  
21 treating health professionals. Covariables will be included for potentially confounding  
22  
23 variables if any differences between groups are identified for key sociodemographic  
24  
25 and clinical characteristics at baseline.  
26  
27

28  
29  
30 A sensitivity analysis will be conducted using imputation techniques to replace non-  
31  
32 ignorable data that is considered to be missing at random over the follow-up period, to  
33  
34 determine whether bias is likely in the complete case analysis. Secondary outcome  
35  
36 comparisons will be conducted at 6-months post-baseline using linear mixed models  
37  
38 where appropriate. Multi-level or nested hierarchical analysis will examine the effect  
39  
40 of clinic and treating health professional effects by examining patient clustering  
41  
42 within clinics, and surgeons and occupational therapists clustered within clinics. The  
43  
44 amount and type of missing data will be reported using descriptive statistics. Data  
45  
46 analysis will be conducted using Stata 16.0 (Statacorp, College Station, TX, USA).  
47  
48  
49

#### 50 Implementation outcomes

51  
52 Implementation will be considered successful if graphical displays of result  
53  
54 summaries are presented to treating clinicians immediately prior to more than 85% of  
55  
56 consultations where a patient is randomised to receive a report, and if PROMs and  
57  
58 summaries are filed in electronic medical records for more than 75% of patients  
59  
60

1  
2  
3 eligible to have PROM data provided to treating clinicians in the intervention period.  
4

5 The outcomes detailed in Table 2 will be used to determine acceptability and  
6

7  
8 sustainability.  
9  
10  
11  
12  
13  
14  
15  
16  
17  
18  
19  
20  
21  
22  
23  
24  
25  
26  
27  
28  
29  
30  
31  
32  
33  
34  
35  
36  
37  
38  
39  
40  
41  
42  
43  
44  
45  
46  
47  
48  
49  
50  
51  
52  
53  
54  
55  
56  
57  
58  
59  
60

For peer review only

Table 2 Description of the outcomes included in the implementation process evaluation

| Outcome                                                                                                       | Participant of focus | Detailed description of the outcome                                                                                                                                                                                                                                                                                                                                                                                                                                                                                                                                                                                                                                                                                                                                                                                                        | Source of data                                                                                                                 |
|---------------------------------------------------------------------------------------------------------------|----------------------|--------------------------------------------------------------------------------------------------------------------------------------------------------------------------------------------------------------------------------------------------------------------------------------------------------------------------------------------------------------------------------------------------------------------------------------------------------------------------------------------------------------------------------------------------------------------------------------------------------------------------------------------------------------------------------------------------------------------------------------------------------------------------------------------------------------------------------------------|--------------------------------------------------------------------------------------------------------------------------------|
| Acceptability of ePROM interventions for families of children with health conditions and treating clinicians* | Child and caregiver  | <ol style="list-style-type: none"> <li>1. <math>\geq 80\%</math> of families will take <math>&lt; 15</math> minutes to complete the ePROMs as previous research has identified that PROMs that are fast to complete are most acceptable to clinicians and families [26].</li> <li>2. <math>\geq 50\%</math> of families completed ePROMs across all scheduled consultations that were eligible to be included in the study intervention period, where consultations eligible to be included were limited to one consultation over any 1-month period. Based on pre-intervention phase interviews and what was considered acceptable for ongoing implementation of the PROMs routinely in clinical practice in the clinics.</li> <li>3. Phone reminders for PROM completion were required in <math>\leq 50\%</math> of families.</li> </ol> | <p>Electronic data collection for outcome (1) and (2)</p> <p>Field notes</p> <p>Field notes and electronic data collection</p> |

1  
2  
3  
4  
5  
6  
7  
8  
9  
10  
11  
12  
13  
14  
15  
16  
17  
18  
19  
20  
21  
22  
23  
24  
25  
26  
27  
28  
29  
30  
31  
32  
33  
34  
35  
36  
37  
38  
39  
40  
41  
42  
43  
44  
45  
46

---

4. Technology-related issues with graphical displays of result summaries or ePROM completion were present for  $\leq 10\%$  of families across all eligible appointments.

Sustainability of ePROM interventions and evaluation

Child and caregiver

The extent to which the ePROM intervention was maintained or continued in routine clinical practice at the end of the study.

Interviews with child, caregiver and health professional participants.  
Field notes

---

\* Children  $\geq 8$  years will self-report; caregivers will provide proxy-reports for children aged  $< 8$  years except for satisfaction with treatment which will only be self-reported by caregivers.

ePROMs, electronic patient-reported outcome measures

## Implementation evaluation

Acceptability and sustainability of the intervention will be evaluated using interviews, health service and missing data, observational field notes of meetings and each clinic attended or planned, meeting minutes and study emails. Acceptability is defined as the perception among stakeholders that a treatment, service, practice or innovation is agreeable or satisfactory [27]. Sustainability is defined as the extent that a newly implemented treatment is maintained within a service setting's ongoing, stable operations [27]. The data from these sources will be mapped to the Consolidated Framework for Implementation Research [23]. This framework can be used to understand barriers and facilitators to implementing the intervention within an organisation which can assist in determining the sustainability and potential scaling up of the intervention. Factors related to implementation delivery that might have impacted on the intervention effectiveness will also be examined to understand whether and how the expected outcomes were achieved, and the reasons for this.

## Implementation analysis

Interpretive Description [28] will be used to analyse the data initially. This qualitative analysis uses elements from several other qualitative methodologies including phenomenology, grounded theory, and ethnography without focusing on any specific technique [28]. Interpretive Description is ideal for applied clinical questions and analysis of a wide range of data sources [28]. The analysis builds on what is known in terms of current practices and structures of health services and what is known and not known [28]. Data analysis will be conducted iteratively, concurrently with interviews, with interviews conducted during the implementation phase building on analysis of pre-implementation interviews. Framework analysis [29] will then be applied deductively, mapping the data to the pre-defined key constructs of the



1  
2  
3 Consolidated Framework for Implementation Research as overarching themes. The  
4 data will be organised into a framework matrix where columns are codes and rows  
5 are participants [29]. This analysis is conducted across participants as well as within  
6 participants. Steps in framework analysis include familiarization; indexing; charting;  
7 and synthesising [29]. Pre-implementation and post-implementation differences will  
8 be examined, and themes that emerge in addition to the Consolidated Framework for  
9 Implementation Research constructs, will be added to the framework.  
10  
11  
12  
13  
14  
15  
16  
17  
18  
19  
20  
21

22 Interviews will be audio recorded and transcribed verbatim by study personnel.

23 Recordings will be stored in a coded form on a secure password protected folder  
24 within The University of Queensland until coding has been completed, accessible to  
25 two of the investigators and a research assistant. The credibility of the analysis will  
26 be checked using member checking of the interview data, independent coding of the  
27 data by two researchers of at least 20 percent of the data, triangulation of the results  
28 across participant groups (managers, treating health professionals, caregiver and  
29 child participants), and reflective journaling.  
30  
31  
32  
33  
34  
35  
36  
37  
38  
39

#### 40 Electronic platform

41  
42 The electronic survey platform Qualtrics<sup>XM</sup> [21] was chosen to administer the  
43 PROMs and to provide graphical displays of result summaries based on visual  
44 aesthetics of the graphical displays compared to other survey programs and prior  
45 experience of the investigators using the program. Features of the program that were  
46 important for administration of the chosen surveys and study design were the ability  
47 to have open-ended text, email distribution, ability to send reminders, display  
48 longitudinal responses, a recoding values function, automated scoring functionality,  
49 and links to NVivo software [30] for coding open text responses.  
50  
51  
52  
53  
54  
55  
56  
57  
58  
59  
60

## Patient and public involvement

Children aged 8 years and older with life-altering skin conditions, caregivers of children with life-altering skin conditions and treating health professionals in the study setting were involved in all study phases including development of the intervention, process evaluation, study design and implementation evaluation. These stakeholder groups reported on the burden of the planned intervention, potential time required to participate and acceptability of follow-up intervals in pre-implementation interviews. Plans include forming a stakeholder reference group to inform the interpretation and sustainability of the study findings.

## DISCUSSION

To our knowledge studies of PROM interventions have not previously focused on children with life-altering skin conditions. A pragmatic approach has been taken to maximise relevance to the clinical context including limiting exclusion criteria, and developing and delivering an intervention that has limited interference with the running of very busy outpatient clinics. If the intervention is shown to have promising short-term results then secondary prevention impacts particularly on emotional health of caregivers may be likely and the benefits higher in the longer term which will be examined in the future.

An outcome of the proposed study may be refinement of the PEDS-ePROM intervention based on mapping to the Consolidated Framework for Implementation Research which may identify additional elements that should be considered. The findings will also likely inform the design of a multisite cluster effectiveness-implementation study of a patient-reported outcome measure intervention in these children which may reduce the risk of contamination bias [8]. Information obtained

1  
2  
3 will inform ongoing efforts in paediatric care to use patient-reported outcome  
4  
5 measures as part of routine clinical care.  
6

### 7 8 **Strengths and limitations**

9  
10 Strengths of the study include the involvement of stakeholders representing multiple  
11  
12 perspectives (children, caregivers, health professionals) in the development of the  
13  
14 intervention and the process evaluation, and the focus of the intervention and  
15  
16 process evaluation on health-related quality of life. The use of the Consolidated  
17  
18 Framework for Implementation Research is also a strength. This framework was  
19  
20 identified as a good fit for examining the implementation of PROMs in health service  
21  
22 organisations in a recent systematic review of reviews [31] and can assist to  
23  
24 understand how the intervention works (i.e., the process by which behaviour change  
25  
26 occurs) [32]. More specifically, the current study will seek to understand how the  
27  
28 inner setting of the organisation (i.e., organisational culture and structural  
29  
30 characteristics) impacts on implementation which has been identified as a research  
31  
32 gap [31].  
33  
34  
35  
36  
37  
38  
39

40 The lack of blinding of treating health professionals and participants in the  
41  
42 randomised controlled trial is a limitation although blinding is not possible as the  
43  
44 outcomes are patient or proxy-reported and it will be clear to most participants when  
45  
46 results are presented in consultations. However, child and caregiver participants will  
47  
48 be blinded to the hypotheses. Potential contamination bias has also been raised as a  
49  
50 possibility in trials of this nature where several clinics within a facility are included, as  
51  
52 treating health professionals' awareness of issues that should be focused on may be  
53  
54 raised, diluting the impact of the intervention [33].  
55  
56  
57  
58  
59  
60

1  
2  
3 A limitation is the lack of inclusion of families from non-English speaking  
4  
5 backgrounds and some cultural groups. Further attention is required to develop and  
6  
7 test PROM interventions for families from specific cultural backgrounds which is a  
8  
9 challenge in the study setting where people from many cultural backgrounds are  
10  
11 seen. Specifically, people of Aboriginal and Torres Strait Islander descent were not  
12  
13 involved in the development process thus the intervention and study design may not  
14  
15 be acceptable for this group of people and should be established.  
16  
17

### 18 19 **Ethical approval and dissemination**

20  
21 Ethical approval has been received from Children's Health Queensland Hospital and  
22  
23 Health Service Human Research Ethics Committee (HREC/19/QCHQ/56290), The  
24  
25 University of Queensland (2019002233), and Queensland University of Technology  
26  
27 (1900000847).  
28  
29

30  
31  
32  
33 Written consent will be obtained from caregiver and treating health professional  
34  
35 participants once written and verbal information has been provided. Caregivers will  
36  
37 be encouraged to discuss the study with children who can communicate with their  
38  
39 caregivers prior to consent being obtained. Adverse effects will be reported to the  
40  
41 Children's Health Queensland Hospital and Health Service and Human Research  
42  
43 Ethics Committees.  
44  
45  
46  
47  
48  
49  
50  
51  
52  
53  
54  
55  
56  
57  
58  
59  
60

## References

1. De Rosis S, Cerasuolo D, Nuti S. Using patient-reported measures to drive change in healthcare: the experience of the digital, continuous and systematic PREMs observatory in Italy. *BMC Health Serv Res* 2020;**20**(1):315.
2. Basch E. Patient-Reported Outcomes - Harnessing Patients' Voices to Improve Clinical Care. *N Engl J Med* 2017;**376**(2):105-08.
3. Field J, Holmes MM, Newell D. PROMs data: can it be used to make decisions for individual patients? A narrative review. *Patient Relat Outcome Meas* 2019;**10**:233-41.
4. Ishaque S, Karnon J, Chen G, et al. A systematic review of randomised controlled trials evaluating the use of patient-reported outcome measures (PROMs). *Qual Life Res* 2019;**28**(3):567-92.
5. de Wit M, Delemarre-van de Waal HA, Bokma JA, et al. Monitoring and discussing health-related quality of life in adolescents with Type 1 diabetes improve psychosocial well-Being. *Diabetes Care* 2008;**31**(8):1521.
6. Wolfe J, Orellana L, Cook EF, et al. Improving the care of children with advanced cancer by using an electronic patient-reported feedback intervention: results from the PediQUEST randomized controlled trial. *J Clin Oncol* 2014;**32**(11):1119-26.
7. Bickman L, Douglas SR, De Andrade ARV, et al. Implementing a Measurement Feedback System: A Tale of Two Sites. *Adm Policy Ment Health* 2016;**43**(3):410-25.
8. de Jong RK, Snoek H, Staal WG, et al. The effect of patients' feedback on treatment outcome in a child and adolescent psychiatric sample: a randomized controlled trial. *Eur Child Adolesc Psy* 2019;**28**(6):819-34.
9. Maskell J, Newcombe P, Martin G, et al. Psychosocial Functioning Differences in Pediatric Burn Survivors Compared With Healthy Norms. *J Burn Care Res* 2013;**34**(4):465-76.
10. Spuls PI, Gerbens LAA, Simpson E, et al. Patient-Oriented Eczema Measure (POEM), a core instrument to measure symptoms in clinical trials: a Harmonising Outcome Measures for Eczema (HOME) statement. *Br J Dermatol* 2017;**176**(4):979-84.

- 1  
2  
3 11. Chan EKH, Edwards TC, Haywood K, et al. Implementing patient-reported  
4 outcome measures in clinical practice: a companion guide to the ISOQOL  
5 user's guide. *Qual Life Res* 2019;**28**(3):621-27.  
6  
7
- 8 12. Kramer JM, Schwartz A. Reducing Barriers to Patient-Reported Outcome  
9 Measures for People With Cognitive Impairments. *Arch Phys Med Rehabil*  
10 2017;**98**(8):1705-15.  
11  
12
- 13 13. Simons M, Price N, Kimble R, et al. Patient experiences of burn scars in adults  
14 and children and development of a health-related quality of life conceptual  
15 model: A qualitative study. *Burns* 2016;**42**(3):620-32.  
16  
17
- 18 14. Albarracín D, Gillette JC, Earl AN, et al. A Test of Major Assumptions About  
19 Behavior Change: A Comprehensive Look at the Effects of Passive and  
20 Active HIV-Prevention Interventions Since the Beginning of the Epidemic.  
21 *Psychological Bulletin* 2005;**131**(6):856-97.  
22  
23
- 24 15. Varni JW, Limbers CA, Neighbors K, et al. The PedsQL Infant Scales: feasibility,  
25 internal consistency reliability, and validity in healthy and ill infants. *Qual Life*  
26 *Res* 2011;**20**(1):45-55.  
27  
28
- 29 16. Varni JW, Seid M, Knight TS, et al. The PedsQLTM 4.0 Generic Core Scales:  
30 Sensitivity, Responsiveness, and Impact on Clinical Decision-Making. *J*  
31 *Behav Med* 2002;**25**(2):175-93.  
32  
33
- 34 17. Tyack Z, Ziviani J, Kimble R, et al. Measuring the impact of burn scarring on  
35 health-related quality of life: Development and preliminary content validation  
36 of the Brisbane Burn Scar Impact Profile (BBSIP) for children and adults.  
37 *Burns* 2015;**41**(7):1405-19.  
38  
39
- 40 18. Griffiths C, D. H. CARE Burn Scales- Parent Quality of Life Form Version 1,  
41 2018.  
42  
43
- 44 19. Boccara O, Meni C, Leaute-Labreze C, et al. Haemangioma family burden:  
45 creation of a specific questionnaire. *Acta Derm Venereol* 2015;**95**(1):78-82.  
46  
47
- 48 20. Chamlin SL, Mancini AJ, Lai JS, et al. Development and Validation of a Quality-  
49 of-Life Instrument for Infantile Hemangiomas. *J Invest Dermatol*  
50 2015;**135**(6):1533-39.  
51  
52
- 53 21. Qualtrics. Qualtrics: Survey Research Suite. 2014; Available from:  
54 <http://www.qualtrics.com/> (Accessed June 16 2020).  
55  
56  
57  
58  
59  
60

- 1  
2  
3 22. Curran GM, Bauer M, Mittman B, et al. Effectiveness-implementation hybrid  
4 designs: combining elements of clinical effectiveness and implementation  
5 research to enhance public health impact. *Med Care* 2012;**50**(3):217-26.
- 6  
7  
8 23. Damschroder LJ, Aron DC, Keith RE, et al. Fostering implementation of health  
9 services research findings into practice: a consolidated framework for  
10 advancing implementation science. *Implement Sci* 2009;**4**(1):50.
- 11  
12  
13 24. Vasileiou K, Barnett J, Thorpe S, et al. Characterising and justifying sample size  
14 sufficiency in interview-based studies: systematic analysis of qualitative health  
15 research over a 15-year period. *BMC Med Res Methodol* 2018;**18**(1):148-48.
- 16  
17  
18 25. Stevens K. Valuation of the Child Health Utility 9D Index. *PharmacoEconomics*  
19 2012;**30**(8):729-47.
- 20  
21  
22 26. Teela L, van Muilekom MM, Kooij LH, et al. Clinicians' perspective on the  
23 implemented KLIK PROM portal in clinical practice. *Qual Life Res* 2020.
- 24  
25  
26 27. Proctor E, Silmere H, Raghavan R, et al. Outcomes for implementation research:  
27 conceptual distinctions, measurement challenges, and research agenda. *Adm*  
28 *Policy Ment Health* 2011;**38**(2):65-76.
- 29  
30  
31 28. Thorne. S. *Interpretive Description: Qualitative Research for Applied Practice*.  
32 Second ed. New York: Routledge, 2016.
- 33  
34  
35 29. Gale NK, Heath G, Cameron E, et al. Using the framework method for the  
36 analysis of qualitative data in multi-disciplinary health research. *BMC Med*  
37 *Res Methodol* 2013;**13**:117-17.
- 38  
39  
40 30. NVivo 10 [software program]. Version 10. QSR International.  
41 [http://www.qsrinternational.com/products\\_nvivo.aspx](http://www.qsrinternational.com/products_nvivo.aspx) (Accessed June 16,  
42 2020).
- 43  
44  
45 31. Foster A, Croot L, Brazier J, et al. The facilitators and barriers to implementing  
46 patient reported outcome measures in organisations delivering health related  
47 services: a systematic review of reviews. *J Patient Rep Outcomes*  
48 2018;**2**(1):46.
- 49  
50  
51 32. Michie S, Carey RN, Johnston M, et al. From Theory-Inspired to Theory-Based  
52 Interventions: A Protocol for Developing and Testing a Methodology for  
53 Linking Behaviour Change Techniques to Theoretical Mechanisms of Action.  
54 *Ann Behav Med* 2017;**52**(6):501-12.
- 55  
56  
57 33. Greenhalgh J, Dalkin S, Gooding K, et al. Functionality and feedback: a realist  
58 synthesis of the collation, interpretation and utilisation of patient-reported  
59  
60

1  
2  
3 outcome measures data to improve patient care. *Health Services and Delivery*  
4 *Research* 2017;**5**(2).  
5  
6  
7  
8

### 9 **Author contributions**

10 ZT designed the study with input from SM for the effectiveness evaluation, GH for  
11 the implementation evaluation, and RK and MS for integrating with existing clinical  
12 processes. ZT drafted the protocol and SM, MS, TZ, RW and RK critically revised  
13 the manuscript.  
14  
15  
16  
17  
18  
19  
20  
21

### 22 **Funding statement**

23 This work was supported by a Health Services Research grant from the Children's  
24 Hospital Foundation, Brisbane, grant number 50297. The funder had no input into  
25 the design or conduct of the study.  
26  
27  
28  
29  
30  
31

### 32 **Competing interests statement**

33 ZT, MS and RK developed the Brisbane Burn Scar Impact Profile which was  
34 included as a scar-specific measure in this study. MS and RK were clinical staff  
35 members of the health service where the study will be conducted at the time of  
36 submission.  
37  
38  
39  
40  
41  
42  
43  
44

### 45 **Data sharing statement**

46 The final trial dataset will be available to chief investigators. The final trial dataset  
47 may be accessed with approval from the investigators if steps are undertaken to  
48 preserve the confidentiality of the data.  
49  
50  
51  
52  
53

### 54 **Acknowledgements**

55 Nil  
56  
57

### 58 **Figure 1 legend**



1  
2  
3 SPIRIT flow diagram for the effectiveness study component\*  
4

5 **Word count 3932**  
6  
7  
8  
9  
10  
11  
12  
13  
14  
15  
16  
17  
18  
19  
20  
21  
22  
23  
24  
25  
26  
27  
28  
29  
30  
31  
32  
33  
34  
35  
36  
37  
38  
39  
40  
41  
42  
43  
44  
45  
46  
47  
48  
49  
50  
51  
52  
53  
54  
55  
56  
57  
58  
59  
60

For peer review only

| STUDY PERIOD                                               |                       |                        |                                                     |                                                     |
|------------------------------------------------------------|-----------------------|------------------------|-----------------------------------------------------|-----------------------------------------------------|
|                                                            | <i>Enrolment</i>      | <i>Allocation</i>      | <i>Post-allocation</i>                              |                                                     |
| <b>TIMEPOINT</b>                                           | <b>-t<sub>1</sub></b> | <b>0<br/>Baseline*</b> | <b>t<sub>1</sub><br/>3-months<br/>post-baseline</b> | <b>t<sub>2</sub><br/>6-months<br/>post-baseline</b> |
| <b>ENROLMENT:</b>                                          |                       |                        |                                                     |                                                     |
| Eligibility screen                                         | X                     |                        |                                                     |                                                     |
| Informed consent                                           | X                     | X                      |                                                     |                                                     |
| Allocation                                                 |                       | X                      |                                                     |                                                     |
| <b>INTERVENTIONS:</b>                                      |                       |                        |                                                     |                                                     |
| <i>PEDS-ePROM</i>                                          |                       | ◄                      | —————                                               | ►                                                   |
| <i>ePROM</i>                                               |                       | ◄                      | —————                                               | ►                                                   |
| <b>EVALUATIONS:</b>                                        |                       |                        |                                                     |                                                     |
| <i>Sociodemographic details</i>                            |                       | X                      |                                                     |                                                     |
| <i>Clinical characteristics</i>                            |                       | X                      |                                                     |                                                     |
| <i>PEDS-QL (Infant &amp; generic scales)</i>               |                       | X                      | X                                                   | X                                                   |
| <i>Brisbane Burn Scar Impact Profile**</i>                 |                       | X                      | X                                                   | X                                                   |
| <i>CARe Burn Scales**</i>                                  |                       | X                      | X                                                   | X                                                   |
| <i>Haemangioma Family Burden Questionnaire***</i>          |                       | X                      | X                                                   | X                                                   |
| <i>Infantile Haemangioma Quality-of-Life Instrument***</i> |                       | X                      | X                                                   | X                                                   |
| <i>Satisfaction with treatment</i>                         |                       |                        | X                                                   | X                                                   |
| <i>Referrals</i>                                           |                       |                        | X                                                   | X                                                   |

\*Baseline measures completed prior to randomization; ≥2<sup>nd</sup> appointment vascular clinic, ≥1<sup>st</sup> appointment scar clinic; \*\* burn scar clinic only; \*\*\* vascular clinic only

Figure 1

Supplementary File 1 Details of the outcomes in the intervention and effectiveness evaluation

| Outcome                                                          | Outcome measure                          | Participant of focus | Domains, subscales, items or versions used in the study                                                                        | Used in study intervention or evaluation | Description                                                                                                                                                                                                                                                                                                                                   | Psychometrics                                                                                                                                                                                                                               |
|------------------------------------------------------------------|------------------------------------------|----------------------|--------------------------------------------------------------------------------------------------------------------------------|------------------------------------------|-----------------------------------------------------------------------------------------------------------------------------------------------------------------------------------------------------------------------------------------------------------------------------------------------------------------------------------------------|---------------------------------------------------------------------------------------------------------------------------------------------------------------------------------------------------------------------------------------------|
| Generic health-related quality of life                           | CHU-9D                                   | Child                | 3 to 5 years (parent proxy)<br>5 to 7 years (parent proxy version)<br>7 to 8 years (parent proxy)<br>> 8 years version (child) | Evaluation                               | A measure of health-related quality of life that can be used with child aged 3 years and older. The parent proxy version for children aged 3 to 5 years has 10 items with an additional item on overall health compared to 9-item versions for other versions.                                                                                | A reliable and valid measure recommended for economic evaluations in paediatric settings [1-3]. 3-5 year version has not yet been validated (personal communication, Katherine Stevens). The item on schoolwork/homework has been modified. |
| Generic health-related quality of life (primary outcome measure) | PEDS-QL 4.0<br>Generic and Infant Scales | Child                | All items                                                                                                                      | Evaluation and intervention              | Generic 4.0 scale: 23 items, 4 domains (physical, emotional, social and school functioning), 3 summary scores (psychosocial health, physical health, total score). Scores will be transformed on a 0 to 100 and scored as recommended by the developers (Mapi Research Trust and Varni, 2017, scaling and scoring, version 17, available from | Validation (including reproducibility and responsiveness testing) supported for children with acute and chronic conditions including those in a hospital setting [4,5].                                                                     |

<http://www.pedsqol.org/PedsQL-Scoring.pdf>, accessed 11.05.2020).

|                                                   |                                       |                     |           |                             |                                                                                                                                                                                                                                                                                                                                           |                                                                                                                                                                                                                                                                        |
|---------------------------------------------------|---------------------------------------|---------------------|-----------|-----------------------------|-------------------------------------------------------------------------------------------------------------------------------------------------------------------------------------------------------------------------------------------------------------------------------------------------------------------------------------------|------------------------------------------------------------------------------------------------------------------------------------------------------------------------------------------------------------------------------------------------------------------------|
| Condition-specific health-related quality of life | The Brisbane Burn Scar Impact Profile | Child and caregiver | All items | Evaluation and intervention | Groups of items measured were overall impact of burn scars; frequency and impact of itch, pain and other sensations; school, play and daily activities (includes mobility and activities of daily living items); friendships and social interactions; appearance; emotional reactions; physical symptoms; and parent and family concerns. | Content validity (children with burn scars and caregiver involvement in development) [6]. Psychometric testing in children and caregivers has largely supported longitudinal validity, reproducibility and responsiveness from around the time of wound healing [7,8]. |
| Condition-specific health-related quality of life | CARe Burn Scales                      | Caregiver           | 15 items  | Evaluation and intervention | Self-worth and negative mood parent scale items.                                                                                                                                                                                                                                                                                          | Content validity (caregivers of children with burns involved in development). Further validity testing is underway but not yet published (personal communication, Catrin Griffiths).                                                                                   |
| Condition-specific health-related quality of life |                                       | Child and caregiver | 4 items   | Evaluation and intervention | Four items from the 20-item questionnaire were included. Three items forming the relationship and work dimension were included (e.g.,                                                                                                                                                                                                     | Structural validity: internal coherence (Cronbach's $\alpha$ : 0.93). Construct validity: correlation with mental                                                                                                                                                      |

1  
2  
3  
4  
5  
6  
7  
8  
9  
10  
11  
12  
13  
14  
15  
16  
17  
18  
19  
20  
21  
22  
23  
24  
25  
26  
27  
28  
29  
30  
31  
32  
33  
34  
35  
36  
37  
38  
39  
40  
41  
42  
43  
44  
45  
46

|                                                   |                                                  |                     |                                |                             |                                                                                                                                                                                                                                                                                                   |                                                                                                                                                                                                                                    |
|---------------------------------------------------|--------------------------------------------------|---------------------|--------------------------------|-----------------------------|---------------------------------------------------------------------------------------------------------------------------------------------------------------------------------------------------------------------------------------------------------------------------------------------------|------------------------------------------------------------------------------------------------------------------------------------------------------------------------------------------------------------------------------------|
|                                                   |                                                  |                     |                                |                             | time spent with other children, impact of the haemangioma on career and stopping work). In addition the single item on budget and financial resources was included.                                                                                                                               | dimension of the Short-Form-12 (r = -0.75), and Psychological General Well-Being Index (r = -0.61). Discriminant validity: significant differences were found according to the size and location of the infantile haemangioma [9]. |
| Condition-specific health-related quality of life | Infantile Haemangioma Quality-of-Life Instrument | Child and caregiver | All items of the final measure | Evaluation and intervention | The 29 final items were included: 5 items targeting the child and the remainder targeting the caregiver. 4 subscales: child physical symptoms, child social interactions, parent emotional functioning, and parent psychosocial functioning.                                                      | Content validity (with parents involved in the development), test-retest reliability and structural validity supported [10].                                                                                                       |
| Satisfaction with treatment                       | Study specific                                   | Caregiver           | N/A                            | Evaluation                  | An 11-point condition specific numeric rating scale with anchors of very dissatisfied to very satisfied will be asked similar to the numeric rating scale used in a previous study by the authors with children with burn scars and their caregivers [11] at 3-months and 6-months post-baseline. | N/A                                                                                                                                                                                                                                |
| Referrals                                         | Study specific                                   | Child and caregiver | N/A                            | Evaluation                  | The number and type of referrals for child and caregiver                                                                                                                                                                                                                                          | N/A                                                                                                                                                                                                                                |

1  
2  
3  
4  
5  
6  
7  
8  
9  
10  
11  
12  
13  
14  
15  
16  
17  
18  
19  
20  
21  
22  
23  
24  
25  
26  
27  
28  
29  
30  
31  
32  
33  
34  
35  
36  
37  
38  
39  
40  
41  
42  
43  
44  
45  
46

---

participants to health professionals during 6-month intervention period. Referrals will be those made by health professional participants receiving result summaries in their consultations. Taken from medical records.

---

For peer review only

## References

1. Chen G, Flynn T, Stevens K, et al. Assessing the Health-Related Quality of Life of Australian Adolescents: An Empirical Comparison of the Child Health Utility 9D and EQ-5D-Y Instruments. *Value Health* 2015;**18**(4):432-8.
2. Stevens K. Valuation of the Child Health Utility 9D Index. *PharmacoEconomics* 2012;**30**(8):729-47.
3. Ratcliffe J, Flynn T, Terlich F, et al. Developing Adolescent-Specific Health State Values for Economic Evaluation. *PharmacoEconomics* 2012;**30**(8):713-27.
4. Desai AD, Zhou C, Stanford S, et al. Validity and responsiveness of the pediatric quality of life inventory (PedsQL) 4.0 generic core scales in the pediatric inpatient setting. *JAMA Pediatr* 2014;**168**(12):1114-21.
5. Varni JW, Seid M, Knight TS, et al. The PedsQLTM 4.0 Generic Core Scales: Sensitivity, Responsiveness, and Impact on Clinical Decision-Making. *J Behav Med* 2002;**25**(2):175-93.
6. Tyack Z, Ziviani J, Kimble R, et al. Measuring the impact of burn scarring on health-related quality of life: Development and preliminary content validation of the Brisbane Burn Scar Impact Profile (BBSIP) for children and adults. *Burns* 2015;**41**(7):1405-19.
7. Simons M, Kimble R, McPhail S, et al. The longitudinal validity, reproducibility and responsiveness of the Brisbane Burn Scar Impact Profile (caregiver report for young children version) for measuring health-related quality of life in children with burn scars. *Burns* 2019;**45**(8):1792-809.
8. Simons M, Kimble R, McPhail S, et al. The Brisbane Burn Scar Impact Profile (child and young person version) for measuring health-related quality of life in children with burn scars: A longitudinal cohort study of reliability, validity and responsiveness. *Burns* 2019;**45**(7):1537-52.
9. Boccara O, Meni C, Leaute-Labreze C, et al. Haemangioma family burden: creation of a specific questionnaire. *Acta Derm Venereol* 2015;**95**(1):78-82.
10. Chamlin SL, Mancini AJ, Lai JS, et al. Development and Validation of a Quality-of-Life Instrument for Infantile Hemangiomas. *J Invest Dermatol* 2015;**135**(6):1533-39.
11. Wiseman J, Ware RS, Simons M, et al. Effectiveness of topical silicone gel and pressure garment therapy for burn scar prevention and management in children: a randomized controlled trial. *Clin Rehabil* 2019;**34**(1):120-31.

# Reporting checklist for protocol of a clinical trial.

Based on the SPIRIT guidelines.

## Instructions to authors

Complete this checklist by entering the page numbers from your manuscript where readers will find each of the items listed below.

Your article may not currently address all the items on the checklist. Please modify your text to include the missing information. If you are certain that an item does not apply, please write "n/a" and provide a short explanation.

Upload your completed checklist as an extra file when you submit to a journal.

In your methods section, say that you used the SPIRIT reporting guidelines, and cite them as:

Chan A-W, Tetzlaff JM, Altman DG, Laupacis A, Gøtzsche PC, Krleža-Jerić K, Hróbjartsson A, Mann H, Dickersin K, Berlin J, Doré C, Parulekar W, Summerskill W, Groves T, Schulz K, Sox H, Rockhold FW, Rennie D, Moher D. SPIRIT 2013 Statement: Defining standard protocol items for clinical trials. *Ann Intern Med.* 2013;158(3):200-207

Reporting Item

Page Number

### Administrative

#### information

|       |                    |                                                                                                              |   |
|-------|--------------------|--------------------------------------------------------------------------------------------------------------|---|
| Title | <a href="#">#1</a> | Descriptive title identifying the study design, population, interventions, and, if applicable, trial acronym | 1 |
|-------|--------------------|--------------------------------------------------------------------------------------------------------------|---|



|    |                     |                     |                                                        |       |
|----|---------------------|---------------------|--------------------------------------------------------|-------|
| 1  | Trial registration  | <a href="#">#2a</a> | Trial identifier and registry name. If not yet         | 3     |
| 2  |                     |                     | registered, name of intended registry                  |       |
| 3  |                     |                     |                                                        |       |
| 4  |                     |                     |                                                        |       |
| 5  |                     |                     |                                                        |       |
| 6  | Trial registration: | <a href="#">#2b</a> | All items from the World Health Organization Trial     | n/a   |
| 7  |                     |                     | Registration Data Set                                  |       |
| 8  | data set            |                     |                                                        |       |
| 9  |                     |                     |                                                        |       |
| 10 |                     |                     |                                                        |       |
| 11 | Protocol version    | <a href="#">#3</a>  | Date and version identifier                            |       |
| 12 |                     |                     |                                                        |       |
| 13 |                     |                     |                                                        |       |
| 14 |                     |                     |                                                        |       |
| 15 | Funding             | <a href="#">#4</a>  | Sources and types of financial, material, and other    | 28    |
| 16 |                     |                     | support                                                |       |
| 17 |                     |                     |                                                        |       |
| 18 |                     |                     |                                                        |       |
| 19 |                     |                     |                                                        |       |
| 20 | Roles and           | <a href="#">#5a</a> | Names, affiliations, and roles of protocol             | 28    |
| 21 |                     |                     | contributors                                           |       |
| 22 | responsibilities:   |                     |                                                        |       |
| 23 |                     |                     |                                                        |       |
| 24 | contributorship     |                     |                                                        |       |
| 25 |                     |                     |                                                        |       |
| 26 |                     |                     |                                                        |       |
| 27 |                     |                     |                                                        |       |
| 28 | Roles and           | <a href="#">#5b</a> | Name and contact information for the trial sponsor     | n/a   |
| 29 |                     |                     |                                                        |       |
| 30 | responsibilities:   |                     |                                                        |       |
| 31 |                     |                     |                                                        |       |
| 32 | sponsor contact     |                     |                                                        |       |
| 33 |                     |                     |                                                        |       |
| 34 | information         |                     |                                                        |       |
| 35 |                     |                     |                                                        |       |
| 36 |                     |                     |                                                        |       |
| 37 |                     |                     |                                                        |       |
| 38 | Roles and           | <a href="#">#5c</a> | Role of study sponsor and funders, if any, in study    | 28    |
| 39 |                     |                     | design; collection, management, analysis, and          |       |
| 40 | responsibilities:   |                     | interpretation of data; writing of the report; and the |       |
| 41 |                     |                     | decision to submit the report for publication,         |       |
| 42 | sponsor and funder  |                     | including whether they will have ultimate authority    |       |
| 43 |                     |                     | over any of these activities                           |       |
| 44 |                     |                     |                                                        |       |
| 45 |                     |                     |                                                        |       |
| 46 |                     |                     |                                                        |       |
| 47 |                     |                     |                                                        |       |
| 48 |                     |                     |                                                        |       |
| 49 |                     |                     |                                                        |       |
| 50 |                     |                     |                                                        |       |
| 51 |                     |                     |                                                        |       |
| 52 | Roles and           | <a href="#">#5d</a> | Composition, roles, and responsibilities of the        | 3, 21 |
| 53 |                     |                     | coordinating centre, steering committee, endpoint      |       |
| 54 | responsibilities:   |                     | adjudication committee, data management team,          |       |
| 55 |                     |                     |                                                        |       |
| 56 | committees          |                     |                                                        |       |
| 57 |                     |                     |                                                        |       |
| 58 |                     |                     |                                                        |       |
| 59 |                     |                     |                                                        |       |
| 60 |                     |                     |                                                        |       |

and other individuals or groups overseeing the trial,  
if applicable (see Item 21a for data monitoring  
committee)

## Introduction

|                                                  |                     |                                                                                                                                                                                                            |    |
|--------------------------------------------------|---------------------|------------------------------------------------------------------------------------------------------------------------------------------------------------------------------------------------------------|----|
| Background and rationale                         | <a href="#">#6a</a> | Description of research question and justification for undertaking the trial, including summary of relevant studies (published and unpublished) examining benefits and harms for each intervention         | 5  |
| Background and rationale: choice of comparators  | <a href="#">#6b</a> | Explanation for choice of comparators                                                                                                                                                                      | 5  |
| Objectives                                       | <a href="#">#7</a>  | Specific objectives or hypotheses                                                                                                                                                                          | 6  |
| Trial design                                     | <a href="#">#8</a>  | Description of trial design including type of trial (eg, parallel group, crossover, factorial, single group), allocation ratio, and framework (eg, superiority, equivalence, non-inferiority, exploratory) | 12 |
| <b>Methods:</b>                                  |                     |                                                                                                                                                                                                            |    |
| <b>Participants, interventions, and outcomes</b> |                     |                                                                                                                                                                                                            |    |
| Study setting                                    | <a href="#">#9</a>  | Description of study settings (eg, community clinic, academic hospital) and list of countries where data will be collected. Reference to where list of study                                               | 11 |

|    |                      |                                                                             |        |
|----|----------------------|-----------------------------------------------------------------------------|--------|
| 1  |                      | sites can be obtained                                                       |        |
| 2  |                      |                                                                             |        |
| 3  |                      |                                                                             |        |
| 4  | Eligibility criteria | <a href="#">#10</a> Inclusion and exclusion criteria for participants. If   | 13,14  |
| 5  |                      | applicable, eligibility criteria for study centres and                      |        |
| 6  |                      | individuals who will perform the interventions (eg,                         |        |
| 7  |                      | surgeons, psychotherapists)                                                 |        |
| 8  |                      |                                                                             |        |
| 9  |                      |                                                                             |        |
| 10 |                      |                                                                             |        |
| 11 |                      |                                                                             |        |
| 12 |                      |                                                                             |        |
| 13 | Interventions:       | <a href="#">#11a</a> Interventions for each group with sufficient detail to | 8-10   |
| 14 | description          | allow replication, including how and when they will                         |        |
| 15 |                      | be administered                                                             |        |
| 16 |                      |                                                                             |        |
| 17 |                      |                                                                             |        |
| 18 |                      |                                                                             |        |
| 19 |                      |                                                                             |        |
| 20 |                      |                                                                             |        |
| 21 | Interventions:       | <a href="#">#11b</a> Criteria for discontinuing or modifying allocated      | n/a    |
| 22 | modifications        | interventions for a given trial participant (eg, drug                       |        |
| 23 |                      | dose change in response to harms, participant                               |        |
| 24 |                      | request, or improving / worsening disease)                                  |        |
| 25 |                      |                                                                             |        |
| 26 |                      |                                                                             |        |
| 27 |                      |                                                                             |        |
| 28 |                      |                                                                             |        |
| 29 |                      |                                                                             |        |
| 30 |                      |                                                                             |        |
| 31 | Interventions:       | <a href="#">#11c</a> Strategies to improve adherence to intervention        | 11, 16 |
| 32 | adherence            | protocols, and any procedures for monitoring                                |        |
| 33 |                      | adherence (eg, drug tablet return; laboratory tests)                        |        |
| 34 |                      |                                                                             |        |
| 35 |                      |                                                                             |        |
| 36 |                      |                                                                             |        |
| 37 |                      |                                                                             |        |
| 38 |                      |                                                                             |        |
| 39 | Interventions:       | <a href="#">#11d</a> Relevant concomitant care and interventions that       | 9,10   |
| 40 | concomitant care     | are permitted or prohibited during the trial                                |        |
| 41 |                      |                                                                             |        |
| 42 |                      |                                                                             |        |
| 43 |                      |                                                                             |        |
| 44 | Outcomes             | <a href="#">#12</a> Primary, secondary, and other outcomes, including       | 14-19  |
| 45 |                      | the specific measurement variable (eg, systolic                             |        |
| 46 |                      | blood pressure), analysis metric (eg, change from                           |        |
| 47 |                      | baseline, final value, time to event), method of                            |        |
| 48 |                      | aggregation (eg, median, proportion), and time point                        |        |
| 49 |                      | for each outcome. Explanation of the clinical                               |        |
| 50 |                      | relevance of chosen efficacy and harm outcomes is                           |        |
| 51 |                      |                                                                             |        |
| 52 |                      |                                                                             |        |
| 53 |                      |                                                                             |        |
| 54 |                      |                                                                             |        |
| 55 |                      |                                                                             |        |
| 56 |                      |                                                                             |        |
| 57 |                      |                                                                             |        |
| 58 |                      |                                                                             |        |
| 59 |                      |                                                                             |        |
| 60 |                      |                                                                             |        |

|    |                           |                                                                        |          |
|----|---------------------------|------------------------------------------------------------------------|----------|
| 1  |                           | strongly recommended                                                   |          |
| 2  |                           |                                                                        |          |
| 3  |                           |                                                                        |          |
| 4  | Participant timeline      | <a href="#">#13</a> Time schedule of enrolment, interventions          | Figure 1 |
| 5  |                           | (including any run-ins and washouts), assessments,                     |          |
| 6  |                           | and visits for participants. A schematic diagram is                    |          |
| 7  |                           | highly recommended (see Figure)                                        |          |
| 8  |                           |                                                                        |          |
| 9  |                           |                                                                        |          |
| 10 |                           |                                                                        |          |
| 11 |                           |                                                                        |          |
| 12 |                           |                                                                        |          |
| 13 | Sample size               | <a href="#">#14</a> Estimated number of participants needed to achieve | 14       |
| 14 |                           | study objectives and how it was determined,                            |          |
| 15 |                           | including clinical and statistical assumptions                         |          |
| 16 |                           | supporting any sample size calculations                                |          |
| 17 |                           |                                                                        |          |
| 18 |                           |                                                                        |          |
| 19 |                           |                                                                        |          |
| 20 |                           |                                                                        |          |
| 21 |                           |                                                                        |          |
| 22 |                           |                                                                        |          |
| 23 | Recruitment               | <a href="#">#15</a> Strategies for achieving adequate participant      | 11, 14   |
| 24 |                           | enrolment to reach target sample size                                  |          |
| 25 |                           |                                                                        |          |
| 26 |                           |                                                                        |          |
| 27 |                           |                                                                        |          |
| 28 |                           |                                                                        |          |
| 29 | <b>Methods:</b>           |                                                                        |          |
| 30 |                           |                                                                        |          |
| 31 | <b>Assignment of</b>      |                                                                        |          |
| 32 |                           |                                                                        |          |
| 33 | <b>interventions (for</b> |                                                                        |          |
| 34 |                           |                                                                        |          |
| 35 | <b>controlled trials)</b> |                                                                        |          |
| 36 |                           |                                                                        |          |
| 37 |                           |                                                                        |          |
| 38 | Allocation:               | <a href="#">#16a</a> Method of generating the allocation sequence (eg, | 12       |
| 39 | sequence                  | computer-generated random numbers), and list of                        |          |
| 40 |                           | any factors for stratification. To reduce predictability               |          |
| 41 | generation                | of a random sequence, details of any planned                           |          |
| 42 |                           | restriction (eg, blocking) should be provided in a                     |          |
| 43 |                           | separate document that is unavailable to those who                     |          |
| 44 |                           | enrol participants or assign interventions                             |          |
| 45 |                           |                                                                        |          |
| 46 |                           |                                                                        |          |
| 47 |                           |                                                                        |          |
| 48 |                           |                                                                        |          |
| 49 |                           |                                                                        |          |
| 50 |                           |                                                                        |          |
| 51 |                           |                                                                        |          |
| 52 |                           |                                                                        |          |
| 53 |                           |                                                                        |          |
| 54 |                           |                                                                        |          |
| 55 | Allocation                | <a href="#">#16b</a> Mechanism of implementing the allocation          | 12       |
| 56 | concealment               | sequence (eg, central telephone; sequentially                          |          |
| 57 |                           |                                                                        |          |
| 58 |                           |                                                                        |          |
| 59 |                           |                                                                        |          |
| 60 |                           |                                                                        |          |

|    |                        |                      |                                                        |                    |
|----|------------------------|----------------------|--------------------------------------------------------|--------------------|
| 1  | mechanism              |                      | numbered, opaque, sealed envelopes), describing        |                    |
| 2  |                        |                      |                                                        |                    |
| 3  |                        |                      | any steps to conceal the sequence until                |                    |
| 4  |                        |                      |                                                        |                    |
| 5  |                        |                      | interventions are assigned                             |                    |
| 6  |                        |                      |                                                        |                    |
| 7  |                        |                      |                                                        |                    |
| 8  | Allocation:            | <a href="#">#16c</a> | Who will generate the allocation sequence, who will    | 12                 |
| 9  |                        |                      |                                                        |                    |
| 10 | implementation         |                      | enrol participants, and who will assign participants   |                    |
| 11 |                        |                      |                                                        |                    |
| 12 |                        |                      | to interventions                                       |                    |
| 13 |                        |                      |                                                        |                    |
| 14 |                        |                      |                                                        |                    |
| 15 | Blinding (masking)     | <a href="#">#17a</a> | Who will be blinded after assignment to                | 23                 |
| 16 |                        |                      |                                                        |                    |
| 17 |                        |                      | interventions (eg, trial participants, care providers, |                    |
| 18 |                        |                      |                                                        |                    |
| 19 |                        |                      | outcome assessors, data analysts), and how             |                    |
| 20 |                        |                      |                                                        |                    |
| 21 |                        |                      |                                                        |                    |
| 22 |                        |                      |                                                        |                    |
| 23 | Blinding (masking):    | <a href="#">#17b</a> | If blinded, circumstances under which unblinding is    | n/a                |
| 24 |                        |                      |                                                        |                    |
| 25 | emergency              |                      | permissible, and procedure for revealing a             |                    |
| 26 |                        |                      |                                                        |                    |
| 27 | unblinding             |                      | participant's allocated intervention during the trial  |                    |
| 28 |                        |                      |                                                        |                    |
| 29 |                        |                      |                                                        |                    |
| 30 |                        |                      |                                                        |                    |
| 31 | <b>Methods: Data</b>   |                      |                                                        |                    |
| 32 |                        |                      |                                                        |                    |
| 33 | <b>collection,</b>     |                      |                                                        |                    |
| 34 |                        |                      |                                                        |                    |
| 35 | <b>management, and</b> |                      |                                                        |                    |
| 36 |                        |                      |                                                        |                    |
| 37 | <b>analysis</b>        |                      |                                                        |                    |
| 38 |                        |                      |                                                        |                    |
| 39 |                        |                      |                                                        |                    |
| 40 |                        |                      |                                                        |                    |
| 41 | Data collection plan   | <a href="#">#18a</a> | Plans for assessment and collection of outcome,        | Supplementary      |
| 42 |                        |                      |                                                        |                    |
| 43 |                        |                      | baseline, and other trial data, including any related  | file 1, 14,15, 17- |
| 44 |                        |                      |                                                        |                    |
| 45 |                        |                      | processes to promote data quality (eg, duplicate       | 19                 |
| 46 |                        |                      |                                                        |                    |
| 47 |                        |                      | measurements, training of assessors) and a             |                    |
| 48 |                        |                      |                                                        |                    |
| 49 |                        |                      | description of study instruments (eg,                  |                    |
| 50 |                        |                      |                                                        |                    |
| 51 |                        |                      | questionnaires, laboratory tests) along with their     |                    |
| 52 |                        |                      |                                                        |                    |
| 53 |                        |                      | reliability and validity, if known. Reference to where |                    |
| 54 |                        |                      |                                                        |                    |
| 55 |                        |                      | data collection forms can be found, if not in the      |                    |
| 56 |                        |                      |                                                        |                    |
| 57 |                        |                      |                                                        |                    |
| 58 |                        |                      |                                                        |                    |
| 59 |                        |                      |                                                        |                    |
| 60 |                        |                      |                                                        |                    |

|    |                            |                                                                             |        |
|----|----------------------------|-----------------------------------------------------------------------------|--------|
| 1  |                            | protocol                                                                    |        |
| 2  |                            |                                                                             |        |
| 3  |                            |                                                                             |        |
| 4  | Data collection plan:      | <a href="#">#18b</a> Plans to promote participant retention and complete    | 11     |
| 5  |                            |                                                                             |        |
| 6  | retention                  | follow-up, including list of any outcome data to be                         |        |
| 7  |                            |                                                                             |        |
| 8  |                            | collected for participants who discontinue or deviate                       |        |
| 9  |                            |                                                                             |        |
| 10 |                            | from intervention protocols                                                 |        |
| 11 |                            |                                                                             |        |
| 12 |                            |                                                                             |        |
| 13 | Data management            | <a href="#">#19</a> Plans for data entry, coding, security, and storage,    | 11, 21 |
| 14 |                            |                                                                             |        |
| 15 |                            | including any related processes to promote data                             |        |
| 16 |                            |                                                                             |        |
| 17 |                            | quality (eg, double data entry; range checks for data                       |        |
| 18 |                            |                                                                             |        |
| 19 |                            | values). Reference to where details of data                                 |        |
| 20 |                            |                                                                             |        |
| 21 |                            | management procedures can be found, if not in the                           |        |
| 22 |                            |                                                                             |        |
| 23 |                            | protocol                                                                    |        |
| 24 |                            |                                                                             |        |
| 25 |                            |                                                                             |        |
| 26 |                            |                                                                             |        |
| 27 |                            |                                                                             |        |
| 28 | Statistics: outcomes       | <a href="#">#20a</a> Statistical methods for analysing primary and          | 16, 20 |
| 29 |                            |                                                                             |        |
| 30 |                            | secondary outcomes. Reference to where other                                |        |
| 31 |                            |                                                                             |        |
| 32 |                            | details of the statistical analysis plan can be found,                      |        |
| 33 |                            |                                                                             |        |
| 34 |                            | if not in the protocol                                                      |        |
| 35 |                            |                                                                             |        |
| 36 |                            |                                                                             |        |
| 37 |                            |                                                                             |        |
| 38 | Statistics: additional     | <a href="#">#20b</a> Methods for any additional analyses (eg, subgroup      | 17     |
| 39 |                            |                                                                             |        |
| 40 | analyses                   | and adjusted analyses)                                                      |        |
| 41 |                            |                                                                             |        |
| 42 |                            |                                                                             |        |
| 43 | Statistics: analysis       | <a href="#">#20c</a> Definition of analysis population relating to protocol | 17     |
| 44 |                            |                                                                             |        |
| 45 | population and             | non-adherence (eg, as randomised analysis), and                             |        |
| 46 |                            |                                                                             |        |
| 47 | missing data               | any statistical methods to handle missing data (eg,                         |        |
| 48 |                            |                                                                             |        |
| 49 |                            | multiple imputation)                                                        |        |
| 50 |                            |                                                                             |        |
| 51 |                            |                                                                             |        |
| 52 |                            |                                                                             |        |
| 53 | <b>Methods: Monitoring</b> |                                                                             |        |
| 54 |                            |                                                                             |        |
| 55 |                            |                                                                             |        |
| 56 | Data monitoring:           | <a href="#">#21a</a> Composition of data monitoring committee (DMC);        | n/a    |
| 57 |                            |                                                                             |        |
| 58 |                            |                                                                             |        |
| 59 |                            |                                                                             |        |
| 60 |                            |                                                                             |        |

|    |                      |                      |                                                          |       |
|----|----------------------|----------------------|----------------------------------------------------------|-------|
| 1  | formal committee     |                      | summary of its role and reporting structure;             |       |
| 2  |                      |                      |                                                          |       |
| 3  |                      |                      | statement of whether it is independent from the          |       |
| 4  |                      |                      |                                                          |       |
| 5  |                      |                      | sponsor and competing interests; and reference to        |       |
| 6  |                      |                      |                                                          |       |
| 7  |                      |                      | where further details about its charter can be found,    |       |
| 8  |                      |                      |                                                          |       |
| 9  |                      |                      | if not in the protocol. Alternatively, an explanation of |       |
| 10 |                      |                      |                                                          |       |
| 11 |                      |                      | why a DMC is not needed                                  |       |
| 12 |                      |                      |                                                          |       |
| 13 |                      |                      |                                                          |       |
| 14 |                      |                      |                                                          |       |
| 15 | Data monitoring:     | <a href="#">#21b</a> | Description of any interim analyses and stopping         | n/a   |
| 16 |                      |                      |                                                          |       |
| 17 | interim analysis     |                      | guidelines, including who will have access to these      |       |
| 18 |                      |                      |                                                          |       |
| 19 |                      |                      | interim results and make the final decision to           |       |
| 20 |                      |                      |                                                          |       |
| 21 |                      |                      | terminate the trial                                      |       |
| 22 |                      |                      |                                                          |       |
| 23 |                      |                      |                                                          |       |
| 24 |                      |                      |                                                          |       |
| 25 | Harms                | <a href="#">#22</a>  | Plans for collecting, assessing, reporting, and          | 24,15 |
| 26 |                      |                      |                                                          |       |
| 27 |                      |                      | managing solicited and spontaneously reported            |       |
| 28 |                      |                      |                                                          |       |
| 29 |                      |                      | adverse events and other unintended effects of trial     |       |
| 30 |                      |                      |                                                          |       |
| 31 |                      |                      | interventions or trial conduct                           |       |
| 32 |                      |                      |                                                          |       |
| 33 |                      |                      |                                                          |       |
| 34 |                      |                      |                                                          |       |
| 35 | Auditing             | <a href="#">#23</a>  | Frequency and procedures for auditing trial              | n/a   |
| 36 |                      |                      |                                                          |       |
| 37 |                      |                      | conduct, if any, and whether the process will be         |       |
| 38 |                      |                      |                                                          |       |
| 39 |                      |                      | independent from investigators and the sponsor           |       |
| 40 |                      |                      |                                                          |       |
| 41 |                      |                      |                                                          |       |
| 42 | <b>Ethics and</b>    |                      |                                                          |       |
| 43 |                      |                      |                                                          |       |
| 44 | <b>dissemination</b> |                      |                                                          |       |
| 45 |                      |                      |                                                          |       |
| 46 |                      |                      |                                                          |       |
| 47 |                      |                      |                                                          |       |
| 48 | Research ethics      | <a href="#">#24</a>  | Plans for seeking research ethics committee /            | 3, 24 |
| 49 |                      |                      |                                                          |       |
| 50 | approval             |                      | institutional review board (REC / IRB) approval          |       |
| 51 |                      |                      |                                                          |       |
| 52 |                      |                      |                                                          |       |
| 53 | Protocol             | <a href="#">#25</a>  | Plans for communicating important protocol               |       |
| 54 |                      |                      |                                                          |       |
| 55 | amendments           |                      | modifications (eg, changes to eligibility criteria,      |       |
| 56 |                      |                      |                                                          |       |
| 57 |                      |                      | outcomes, analyses) to relevant parties (eg,             |       |
| 58 |                      |                      |                                                          |       |
| 59 |                      |                      |                                                          |       |
| 60 |                      |                      |                                                          |       |

|    |                       |                                                                            |            |
|----|-----------------------|----------------------------------------------------------------------------|------------|
| 1  |                       | investigators, REC / IRBs, trial participants, trial                       |            |
| 2  |                       | registries, journals, regulators)                                          |            |
| 3  |                       |                                                                            |            |
| 4  |                       |                                                                            |            |
| 5  |                       |                                                                            |            |
| 6  | Consent or assent     | <a href="#">#26a</a> Who will obtain informed consent or assent from       | 13, 14, 24 |
| 7  |                       | potential trial participants or authorised surrogates,                     |            |
| 8  |                       | and how (see Item 32)                                                      |            |
| 9  |                       |                                                                            |            |
| 10 |                       |                                                                            |            |
| 11 |                       |                                                                            |            |
| 12 |                       |                                                                            |            |
| 13 | Consent or assent:    | <a href="#">#26b</a> Additional consent provisions for collection and use  | n/a        |
| 14 | ancillary studies     | of participant data and biological specimens in                            |            |
| 15 |                       | ancillary studies, if applicable                                           |            |
| 16 |                       |                                                                            |            |
| 17 |                       |                                                                            |            |
| 18 |                       |                                                                            |            |
| 19 |                       |                                                                            |            |
| 20 |                       |                                                                            |            |
| 21 | Confidentiality       | <a href="#">#27</a> How personal information about potential and           | 28         |
| 22 |                       | enrolled participants will be collected, shared, and                       |            |
| 23 |                       | maintained in order to protect confidentiality before,                     |            |
| 24 |                       | during, and after the trial                                                |            |
| 25 |                       |                                                                            |            |
| 26 |                       |                                                                            |            |
| 27 |                       |                                                                            |            |
| 28 |                       |                                                                            |            |
| 29 |                       |                                                                            |            |
| 30 |                       |                                                                            |            |
| 31 | Declaration of        | <a href="#">#28</a> Financial and other competing interests for principal  | 28         |
| 32 | interests             | investigators for the overall trial and each study site                    |            |
| 33 |                       |                                                                            |            |
| 34 |                       |                                                                            |            |
| 35 |                       |                                                                            |            |
| 36 | Data access           | <a href="#">#29</a> Statement of who will have access to the final trial   | 28         |
| 37 |                       | dataset, and disclosure of contractual agreements                          |            |
| 38 |                       | that limit such access for investigators                                   |            |
| 39 |                       |                                                                            |            |
| 40 |                       |                                                                            |            |
| 41 |                       |                                                                            |            |
| 42 |                       |                                                                            |            |
| 43 |                       |                                                                            |            |
| 44 | Ancillary and post    | <a href="#">#30</a> Provisions, if any, for ancillary and post-trial care, | n/a        |
| 45 | trial care            | and for compensation to those who suffer harm                              |            |
| 46 |                       | from trial participation                                                   |            |
| 47 |                       |                                                                            |            |
| 48 |                       |                                                                            |            |
| 49 |                       |                                                                            |            |
| 50 |                       |                                                                            |            |
| 51 | Dissemination         | <a href="#">#31a</a> Plans for investigators and sponsor to communicate    | 24         |
| 52 | policy: trial results | trial results to participants, healthcare professionals,                   |            |
| 53 |                       | the public, and other relevant groups (eg, via                             |            |
| 54 |                       |                                                                            |            |
| 55 |                       |                                                                            |            |
| 56 |                       |                                                                            |            |
| 57 |                       |                                                                            |            |
| 58 |                       |                                                                            |            |
| 59 |                       |                                                                            |            |
| 60 |                       |                                                                            |            |



publication, reporting in results databases, or other  
 data sharing arrangements), including any  
 publication restrictions

Dissemination [#31b](#) Authorship eligibility guidelines and any intended n/a  
 policy: authorship use of professional writers

Dissemination [#31c](#) Plans, if any, for granting public access to the full 28  
 policy: reproducible protocol, participant-level dataset, and statistical  
 research code

## Appendices

Informed consent [#32](#) Model consent form and other related n/a  
 materials documentation given to participants and authorised  
 surrogates

Biological [#33](#) Plans for collection, laboratory evaluation, and n/a  
 specimens storage of biological specimens for genetic or  
 molecular analysis in the current trial and for future  
 use in ancillary studies, if applicable

None The SPIRIT checklist is distributed under the terms of the Creative Commons Attribution  
 License CC-BY-ND 3.0. This checklist can be completed online using <https://www.goodreports.org/>, a  
 tool made by the [EQUATOR Network](#) in collaboration with [Penelope.ai](#)

# BMJ Open

## Improving the patient-centred care of children with life-altering skin conditions using feedback from electronic patient-reported outcome measures: Protocol for a hybrid effectiveness-implementation study (PEDS-ePROM)

|                                 |                                                                                                                                                                                                                                                                                                                                                                                                                                                                                                                                                                                                                                                                                                                                                                                                                                                                                                                              |
|---------------------------------|------------------------------------------------------------------------------------------------------------------------------------------------------------------------------------------------------------------------------------------------------------------------------------------------------------------------------------------------------------------------------------------------------------------------------------------------------------------------------------------------------------------------------------------------------------------------------------------------------------------------------------------------------------------------------------------------------------------------------------------------------------------------------------------------------------------------------------------------------------------------------------------------------------------------------|
| Journal:                        | <i>BMJ Open</i>                                                                                                                                                                                                                                                                                                                                                                                                                                                                                                                                                                                                                                                                                                                                                                                                                                                                                                              |
| Manuscript ID                   | bmjopen-2020-041861.R1                                                                                                                                                                                                                                                                                                                                                                                                                                                                                                                                                                                                                                                                                                                                                                                                                                                                                                       |
| Article Type:                   | Protocol                                                                                                                                                                                                                                                                                                                                                                                                                                                                                                                                                                                                                                                                                                                                                                                                                                                                                                                     |
| Date Submitted by the Author:   | 25-Oct-2020                                                                                                                                                                                                                                                                                                                                                                                                                                                                                                                                                                                                                                                                                                                                                                                                                                                                                                                  |
| Complete List of Authors:       | <p>Tyack, Zephania; The University of Queensland, Centre for Children's Burns and Trauma Research, Child Health Research Centre; Queensland Children's Hospital</p> <p>Simons, Megan; The University of Queensland, Centre for Children's Burns and Trauma Research, Child Health Research Centre; Queensland Children's Hospital, Department of Occupational Therapy</p> <p>McPhail, Steven; Queensland University of Technology, School of Public Health and Social Work and Institute of Health and Biomedical Innovation</p> <p>Harvey, Gillian; The University of Adelaide, Adelaide Nursing School</p> <p>Zappala, Tania; Queensland Children's Hospital</p> <p>Ware, Robert; Griffith University - GC Campus, Menzies Health Institute Queensland</p> <p>Kimble, Roy; The University of Queensland, Centre for Children's Burns and Trauma Research, Child Health Research Centre; Queensland Children's Hospital</p> |
| <b>Primary Subject Heading</b>: | Paediatrics                                                                                                                                                                                                                                                                                                                                                                                                                                                                                                                                                                                                                                                                                                                                                                                                                                                                                                                  |
| Secondary Subject Heading:      | Patient-centred medicine, Rehabilitation medicine, Dermatology, Health services research                                                                                                                                                                                                                                                                                                                                                                                                                                                                                                                                                                                                                                                                                                                                                                                                                                     |
| Keywords:                       | PAEDIATRICS, Change management < HEALTH SERVICES ADMINISTRATION & MANAGEMENT, Paediatric dermatology < DERMATOLOGY, Telemedicine < BIOTECHNOLOGY & BIOINFORMATICS                                                                                                                                                                                                                                                                                                                                                                                                                                                                                                                                                                                                                                                                                                                                                            |
|                                 |                                                                                                                                                                                                                                                                                                                                                                                                                                                                                                                                                                                                                                                                                                                                                                                                                                                                                                                              |

SCHOLARONE™  
Manuscripts



I, the Submitting Author has the right to grant and does grant on behalf of all authors of the Work (as defined in the below author licence), an exclusive licence and/or a non-exclusive licence for contributions from authors who are: i) UK Crown employees; ii) where BMJ has agreed a CC-BY licence shall apply, and/or iii) in accordance with the terms applicable for US Federal Government officers or employees acting as part of their official duties; on a worldwide, perpetual, irrevocable, royalty-free basis to BMJ Publishing Group Ltd ("BMJ") its licensees and where the relevant Journal is co-owned by BMJ to the co-owners of the Journal, to publish the Work in this journal and any other BMJ products and to exploit all rights, as set out in our [licence](#).

The Submitting Author accepts and understands that any supply made under these terms is made by BMJ to the Submitting Author unless you are acting as an employee on behalf of your employer or a postgraduate student of an affiliated institution which is paying any applicable article publishing charge ("APC") for Open Access articles. Where the Submitting Author wishes to make the Work available on an Open Access basis (and intends to pay the relevant APC), the terms of reuse of such Open Access shall be governed by a Creative Commons licence – details of these licences and which [Creative Commons](#) licence will apply to this Work are set out in our licence referred to above.

Other than as permitted in any relevant BMJ Author's Self Archiving Policies, I confirm this Work has not been accepted for publication elsewhere, is not being considered for publication elsewhere and does not duplicate material already published. I confirm all authors consent to publication of this Work and authorise the granting of this licence.

1  
2  
3 **TITLE: Improving the patient-centred care of children with life-altering skin**  
4 **conditions using feedback from electronic patient-reported outcome**  
5 **measures: Protocol for a hybrid effectiveness-implementation study (PEDS-**  
6 **ePROM)**  
7  
8  
9

10  
11 Dr Zephania Tyack <sup>1,2,5\*</sup>, Associate Professor Megan Simons <sup>1,2</sup>, Professor Steven M  
12 McPhail <sup>5</sup>, Professor Gillian Harvey <sup>3,6</sup> Dr Tania Zappala <sup>2</sup>, Professor Robert S Ware  
13 <sup>4</sup>, Professor Roy Kimble <sup>1,2,6</sup>  
14  
15  
16  
17

18  
19 <sup>1</sup>The University of Queensland, Centre for Children's Burns and Trauma Research,  
20 Child Health Research Centre, St Lucia, QLD, Australia 4072.  
21

22 <sup>2</sup>Queensland Children's Hospital, 501 Stanley St, South Brisbane, QLD, Australia  
23 4101.  
24

25 <sup>3</sup>Adelaide Nursing School, Adelaide Health & Medical Sciences Building, Level 6,  
26 Corner North Terrace & George Street, The University of Adelaide, South Australia  
27 5005 Australia.  
28  
29

30 <sup>4</sup>Menzies Health Institute Queensland, Griffith University, Southport, QLD, Australia  
31 4222.  
32

33 <sup>5</sup>School of Public Health and Social Work and Institute of Health and Biomedical  
34 Innovation, Queensland University of Technology, 149 Victoria Park Rd, Kelvin  
35 Grove, QLD, Australia 4059.  
36  
37  
38

39 <sup>6</sup>Centre for Children's Burns and Trauma Research, Queensland University of  
40 Technology, 149 Victoria Park Rd, Kelvin Grove, QLD, Australia 4059.  
41  
42  
43

44 \*Corresponding author

45 Dr Zephania Tyack

46 Children's Health Research Centre,

47 62 Graham St, South Brisbane, QLD, Australia 4101.

48 Email: [z.tyack@uq.edu.au](mailto:z.tyack@uq.edu.au)  
49  
50  
51

52  
53  
54  
55 Word count 4618  
56  
57  
58  
59  
60

1  
2  
3  
4  
5 **TITLE: Improving the patient-centred care of children with life-altering skin**  
6  
7 **conditions using an electronic patient-reported feedback intervention (PEDS-**  
8  
9 **ePROM): Protocol for a type 2 hybrid effectiveness-implementation study**  
10  
11  
12  
13

14 **ABSTRACT**

15  
16 **Introduction**

17  
18 Using patient-reported outcome measures (PROMs) with children have been  
19 described as 'giving a voice to the child'. Few studies have examined the routine use  
20 of these measures as potentially therapeutic interventions. This study aims to  
21 investigate: (1) the *effectiveness* of feedback from electronic PROMs (PEDS-  
22 ePROM intervention) that target health-related quality of life, to improve health  
23 outcomes, referrals, and treatment satisfaction; and (2) the *implementation* of PEDS-  
24 ePROM by assessing acceptability, sustainability, cost, fidelity and context of the  
25 intervention and study processes.  
26  
27  
28  
29  
30  
31  
32  
33  
34  
35  
36

37 **Methods and analysis**

38  
39 A hybrid II effectiveness-implementation study will be conducted from February 2020  
40 with children with life-altering skin conditions attending two outpatient clinics at a  
41 specialist paediatric children's hospital. A pragmatic randomised controlled trial and  
42 mixed methods process evaluation will be completed. Randomisation will occur at  
43 the child participant level. Children or caregiver proxies completing baseline PROMs  
44 will be randomised to: (1) completion of PROMs plus graphical displays of PROM  
45 results to treating clinicians in consultations, versus (2) completion of PROMs  
46 without graphical display of PROM results. The primary outcome of the effectiveness  
47 trial will be overall health-related quality of life of children using caregiver-proxy  
48 report. Secondary outcomes will include self-reported overall health-related quality of  
49  
50  
51  
52  
53  
54  
55  
56  
57  
58  
59  
60

1  
2  
3 life of children, other health-related quality of life outcomes (e.g., caregiver  
4 psychosocial health), referrals, and treatment satisfaction. Trial data will be primarily  
5 analysed using linear mixed-effects models; and implementation data using  
6 inductive thematic analysis of interviews, meeting minutes, observational field notes  
7 and study communication mapped to the Consolidated Framework for  
8 Implementation Research.  
9  
10  
11  
12  
13  
14  
15  
16  
17  
18

### 19 **Ethics and dissemination**

20  
21 Ethical approval was obtained from Children's Health Queensland Human Research  
22 Ethics Committee (HREC/2019/QCHQ/56290), The University of Queensland  
23 (2019002233), and Queensland University of Technology (1900000847).  
24  
25  
26  
27

28 Dissemination will occur through stakeholder groups, scientific meetings and peer-  
29 reviewed publications.  
30  
31  
32  
33  
34

### 35 **Trial registration**

36  
37 ACTRN12620000174987  
38  
39  
40

### 41 **Keywords**

42  
43  
44 Patient-reported outcome measures, quality of life, paediatrics, patient-centred care,  
45 implementation  
46  
47  
48  
49  
50  
51  
52  
53  
54  
55  
56  
57  
58  
59  
60

## ARTICLE SUMMARY

### Strengths and limitations of this study

- New evidence of the effectiveness and implementation of patient-reported outcome measures in the routine clinical care of children with skin conditions and their caregivers will be generated which has received limited attention.
- Stakeholders representing multiple perspectives (children, caregivers, health professionals) were involved in the development of the intervention and process evaluation.
- Lack of ability to mask participants to the outcomes and contamination of the control group are potential biases, although child and caregiver participants were masked to the hypotheses.

## INTRODUCTION

The routine use of patient-reported outcome measures (PROMs), or proxy-report measures, as part of routine clinical care has been identified as a means of driving change in healthcare systems, to ensure the unique voice of the patient is heard [1,2]. Potential benefits are improvements in shared decision-making, communication with health professionals and adherence to recommended treatments [3]. PROMs are defined as questionnaires completed by a patient with a health condition about their own health and treatment.

A recent systematic review identified that the effectiveness of PROM interventions for people with health conditions compared to usual care has been positive in adequately powered studies [4]. Few trials have been conducted in children. Only 2 of 22 included randomised controlled trials were conducted in children, one focussed on children with diabetes and one on children with cancer [5,6]. Two more recent paediatric cluster randomised controlled trials investigated PROMs used with children with severe mental health conditions attending child and adolescent psychiatric services [7,8]. Only one of the four paediatric trials identified positive effects of the PROM intervention. The positive effects were for psychosocial health-related quality of life but not physical health-related quality of life in children with diabetes [5].

The implementation of the PROMs in routine paediatric care has also recently been investigated in a systematic review, with increased identification and discussion around health-related quality of life (HRQOL) reported, particularly in psychosocial and emotional domains, but with mixed results regarding the impact on quality of



1  
2  
3 care [9]. Quality of care outcomes examined were satisfaction with treatment, referral  
4 rate, and consultation length.  
5  
6  
7  
8  
9

10 Implementation outcomes can be examined using an implementation science  
11 framework such as The Consolidated Framework for Implementation. This  
12 framework has been identified as a 'good fit' for examining the implementation of  
13 PROMs in health service organisations in a recent systematic review of reviews that  
14 can assist to determine factors that influence implementation [10], and understand  
15 how the intervention works (i.e., the process by which behaviour change occurs)  
16 [11]. Multi-level influences on implementation can be examined through a focus on  
17 individual characteristics of patients, families and clinicians (e.g. knowledge & beliefs  
18 about the intervention), as well as organisational and process factors (e.g.,  
19 engagement) [12].  
20  
21  
22  
23  
24  
25  
26  
27  
28  
29  
30  
31  
32  
33  
34

35 This paper will report the protocol for a randomised controlled trial and  
36 implementation study to test the effectiveness and implementation outcomes of a  
37 PROM feedback intervention targeting health-related quality of life, in children with  
38 the life-altering skin conditions of burn scars and infantile haemangiomas (termed  
39 PEDS-ePROM). The intervention involves the delivery of graphical displays of  
40 information from patient-reported outcome measures in routine consultations to  
41 encourage communication about the areas displayed. A comparison intervention  
42 involves the completion of electronic patient-reported outcome measure data without  
43 any graphical display of information (termed ePROM). The need for interventions to  
44 improve the health-related quality of life of these children is highlighted by the lower  
45 health-related quality of life of children with burn scars across multiple domains even  
46  
47  
48  
49  
50  
51  
52  
53  
54  
55  
56  
57  
58  
59  
60

1  
2  
3 years after the actual injury compared to children with cancer [13]. At the time of  
4  
5 publication, the PEDS-ePROM intervention had been designed and the randomised  
6  
7 controlled trial and implementation testing was underway with no findings yet  
8  
9 available.

## 11 **Aims and objectives**

12  
13  
14 The primary effectiveness aim is to determine the short-term effectiveness of  
15  
16 implementing PROMs with graphical displays of result summaries, on overall health-  
17  
18 related quality of life of children with life-altering skin conditions. Secondary aims will  
19  
20 be to examine the effectiveness of the intervention for other health-related quality of  
21  
22 life outcomes of children and caregivers, the number and type of referrals to health  
23  
24 professionals and treatment satisfaction.

### 25 *Hypotheses (effectiveness component)*

- 26  
27  
28  
29  
30  
31  
32 1. The PEDS-ePROM intervention will have a greater effect on overall health-  
33  
34 related quality of life than the ePROM intervention, with a consistent direction  
35  
36 and similar strength of effect across the clinics and conditions, supporting  
37  
38 comparative effectiveness of the intervention.  
39  
40  
41 2. The PEDS-ePROM intervention will increase the number of psychosocial  
42  
43 referrals to health professionals and increase proxy-reported satisfaction with  
44  
45 treatment.  
46

### 47 **Implementation outcomes**

48  
49 The primary aim is to determine the short-term acceptability and sustainability of  
50  
51 implementing the interventions. The secondary aim is to determine the cost, fidelity  
52  
53 and contextual factors related to implementation.  
54  
55  
56  
57  
58  
59  
60

## METHODS AND ANALYSIS

### Development of the study design and intervention

The development of the PEDS-ePROM trial and intervention was conducted from May 2019 to January 2020. We initiated preliminary discussion with clinicians in clinical areas to identify which measures were already being used routinely in practice. Systematic reviews and paediatric literature regarding the use of PROMs were also reviewed. Interview guides were developed to identify health outcomes that are meaningful and of high priority to children, their families and health professionals in the PROM intervention [14]. The nine core questions from the International Society of Quality of Life (ISOQOL) user guide and the companion guide areas were addressed in the interviews [15]. This strategy has been identified as important to improve the engagement of children and young people such that fewer items are missed and responses accurately reflect their experiences and cognitive ability [16].

Interviews were conducted with children with life-altering skin conditions, their caregivers and treating health professionals in two phases as part of the pre-implementation planning, with interview questions mapped to the Consolidated Framework for Implementation Research. In the first phase the most appropriate outcomes and PROMs were identified. In the second phase the content validity of chosen PROMs and process evaluation were confirmed. Potential barriers and benefits to implementation were identified in both phases. For children with burn scars and their families, measures of health-related quality of life specific to scarring were prioritised to include symptoms and treatment burden based on conceptual work from the research team that identified these aspects as central components of

1  
2  
3 health-related quality of life for this group [17]. The design of the randomised  
4  
5 controlled trial was based on systematic review findings that identified greater  
6  
7 benefits when PROM results were provided to clinicians compared to when results  
8  
9 were not provided to clinicians [4]. For the purposes of the current study, PROMs  
10  
11 included proxy caregiver measures as young children cannot self-report their quality  
12  
13 of life or symptoms.  
14  
15

### 16 17 18 19 **PEDS-ePROM intervention**

20  
21 The Pediatric Quality of Life Inventory infant and generic scales [18,19] measuring  
22  
23 health-related quality of life were included as generic measures that were the same  
24  
25 across the clinics and conditions. Condition-specific health-related quality of life  
26  
27 measures were also included as these measures have been identified as being more  
28  
29 responsive to change than generic measures [20]. Condition-specific health-related  
30  
31 quality of life measures selected were the Brisbane Burn Scar Impact Profile [17,21],  
32  
33 The CARE parent scale [22], Hemangioma Family Burden questionnaire [23] and  
34  
35 Infantile Hemangioma Quality of Life Scale [24]. Selected measures targeted  
36  
37 children and their caregivers and a single item targeted siblings. An open-ended  
38  
39 option was also available for child and caregiver participants to report their priorities  
40  
41 for care. Only PROMs meeting the criteria of content validity supported by  
42  
43 involvement of the target group in development were included with the exception of  
44  
45 the treatment satisfaction item. Graphical displays of result summaries from the  
46  
47 Pediatric Quality of Life Inventory and condition-specific measures of health-related  
48  
49 quality of life measure will be presented in consultations for children with skin  
50  
51 conditions and their caregivers to treating clinicians. The components of the  
52  
53 intervention are reported in Table 1.  
54  
55  
56  
57  
58  
59  
60

Table 1. Description of the PEDS-ePROM intervention and ePROM comparison intervention\*

| Clinic           | Mode of administration                                                                                                                                                                     | PEDS-ePROM intervention                             |                                                                                                                                                                                            |                                                                                            | ePROM comparison intervention                                                                                           |                                                                                                                                                                    |                                | Intervention period |
|------------------|--------------------------------------------------------------------------------------------------------------------------------------------------------------------------------------------|-----------------------------------------------------|--------------------------------------------------------------------------------------------------------------------------------------------------------------------------------------------|--------------------------------------------------------------------------------------------|-------------------------------------------------------------------------------------------------------------------------|--------------------------------------------------------------------------------------------------------------------------------------------------------------------|--------------------------------|---------------------|
|                  |                                                                                                                                                                                            | Content                                             | Duration                                                                                                                                                                                   | Frequency                                                                                  | Content                                                                                                                 | Duration                                                                                                                                                           | Frequency                      |                     |
| Burn scar clinic | Administered remotely using email or by a research occupational therapist in the clinic setting. PROM data collected electronically on a device at home or on an Apple iPad in the clinic. | PEDS-QL generic and infant scales BBSIP CARE scales | Approx. 15 mins for child and caregiver participants to complete ePROMs prior consultations. Up to 15 mins to download, print and deliver ePROMs & graphical displays to consultations***. | Delivered in consultations up to 1x/ mth. Based on usual care likely to be delivered 2-3x. | ePROMs delivered and completed as per PEDS-ePROM intervention group. No graphical summaries provided in consultations‡. | Approximately 15 mins for child and caregiver participants to complete ePROMs prior to each consultation. Up to 5 minutes to download, print and deliver ePROM.*** | As per PEDS-ePROM intervention | Baseline - 6 mths † |
| Vascular         | As per burn                                                                                                                                                                                | PEDS-QL                                             | Approx. 10 mins                                                                                                                                                                            | Delivered in                                                                               | ePROMs                                                                                                                  | Approximately                                                                                                                                                      | As per                         | Baseline -          |

1  
2  
3  
4  
5  
6  
7  
8  
9  
10  
11  
12  
13  
14  
15  
16  
17  
18  
19  
20  
21  
22  
23  
24  
25  
26  
27  
28  
29  
30  
31  
32  
33  
34  
35  
36  
37  
38  
39  
40  
41  
42  
43  
44  
45  
46

1  
2  
3  
4  
5  
6  
7  
8  
9  
10  
11  
12  
13  
14  
15  
16  
17  
18  
19  
20  
21  
22  
23  
24  
25  
26  
27  
28  
29  
30  
31  
32  
33  
34  
35  
36  
37  
38  
39  
40  
41  
42  
43  
44  
45  
46

|        |             |                                                                                                                            |                                                                                                                                                                                                             |                                                                             |                                                                                                                                              |                                                                                                                                                 |                                |          |
|--------|-------------|----------------------------------------------------------------------------------------------------------------------------|-------------------------------------------------------------------------------------------------------------------------------------------------------------------------------------------------------------|-----------------------------------------------------------------------------|----------------------------------------------------------------------------------------------------------------------------------------------|-------------------------------------------------------------------------------------------------------------------------------------------------|--------------------------------|----------|
| clinic | scar clinic | infant scales<br>Hemangioma<br>Family Burden<br>questionnaire<br>Infantile<br>Haemangioma<br>Quality-of-Life<br>Instrument | for caregiver<br>participants to<br>complete<br>ePROMs prior to<br>each<br>consultation.<br>Up to 10 mins to<br>download, print<br>and deliver<br>ePROMs &<br>graphical<br>displays to<br>consultations***. | consultations<br>up to 1x/mth.<br>Based on<br>usual care<br>likely 1-2x **. | delivered and<br>completed as<br>per PEDS-<br>ePROM<br>intervention<br>group. No<br>graphical<br>summaries<br>provided in<br>consultations‡. | 10 mins for<br>child and<br>caregiver<br>participants to<br>complete<br>ePROMs prior<br>to each<br>consultation.<br>No printing<br>required.*** | PEDS-<br>ePROM<br>intervention | 6 mths † |
|--------|-------------|----------------------------------------------------------------------------------------------------------------------------|-------------------------------------------------------------------------------------------------------------------------------------------------------------------------------------------------------------|-----------------------------------------------------------------------------|----------------------------------------------------------------------------------------------------------------------------------------------|-------------------------------------------------------------------------------------------------------------------------------------------------|--------------------------------|----------|

\* Based on the Template for Intervention Description and Replication (TIDieR) guidelines

† Post-baseline

‡ Graphical summaries provided to child and caregiver participants and entered into medical records at the end of the study

\*\* Children with ulcerated haemangiomas may receive intervention more frequently

\*\*\* Graphical summaries provided to child and caregiver participants at the end of the study

PROM, patient-reported outcome measure; ePROMs, electronic patient-reported outcome measures; PEDS-QL, Pediatric Evaluation of Quality of Life Inventory; approx., approximately; mins, minutes; mth, months

### **Method for completing PROMs**

Electronically-delivered PROMs were identified as the best option for getting patients to complete the measures at home prior to consultations to reduce the burden of administration of measures and result summaries during busy clinics. The PROMs will be administered via a weblink sent to caregiver participants in an email in the three days prior to their appointment. If the questionnaires are not completed via the weblink, child and caregiver participants will be offered a further opportunity to complete the questionnaires using an iPad prior to their consultation at the outpatient clinic while they are waiting for their consultation where possible. Caregiver proxy-report will continue throughout the study for any child who turns eight years of age after the first caregiver proxy-report. Phone calls will be used to remind caregiver participants to complete the PROMs. The PROMs and graphical display of result summaries will be generated using the online survey software program Qualtrics<sup>XM</sup> [25] and presented to treating health professionals immediately prior to appointments. Copies of the electronically completed PROMs and graphical displays of result summaries will be stored in medical records.

### **Context**

The setting will be two outpatient clinics at a major metropolitan quaternary-level children's hospital in Australia; a burns clinic and a vascular anomalies clinic. Caregivers (or their children with skin conditions if aged 8 years or older) will be consecutively approached and recruited, and the intervention delivered prior to and at these clinics. The catchment of the hospital includes inhabitants from rural, regional and metropolitan areas including those from surrounding islands.

1  
2  
3 Recruitment commenced in January 2019. The first participant was randomised to  
4  
5 receive the intervention in March 2020.  
6  
7  
8  
9

## 10 **Research design**

11  
12 A hybrid type 2 effectiveness-implementation design will be used which blends  
13  
14 evaluating intervention effectiveness and understanding implementation of the  
15  
16 intervention simultaneously [26]. Benefits of this design include reduced lag time for  
17  
18 uptake of the results into routine clinical practice and understanding the barriers and  
19  
20 benefits to implementation [26]. A pragmatic two-arm randomised controlled trial will  
21  
22 be conducted using block randomisation in random blocks of 4, 6 or 8 stratified by  
23  
24 diagnostic group (i.e., infantile haemangiomas, burn scars), with child participants as  
25  
26 the unit of randomisation; and an embedded qualitative process evaluation involving  
27  
28 interviews with clinicians, and child and caregiver participants. The randomisation  
29  
30 sequence will be prepared by a statistician independent from the study and will be  
31  
32 concealed using sequentially numbered, opaque, sealed envelopes with tamper  
33  
34 proof tape prepared by a person independent from the study.  
35  
36  
37  
38  
39  
40  
41

42 The randomised controlled trial arms will be: (1) PROM completion plus graphical  
43  
44 display of result summaries to clinicians (intervention group) versus; (2) PROM  
45  
46 completion without graphical display of result summaries to clinicians (comparison  
47  
48 group).  
49  
50  
51

52  
53 Baseline PROM measurement will occur before randomisation. PROM measurement  
54  
55 will occur prior to or at one or more subsequent hospital appointments over the  
56  
57 following 6-months and follow-up measurement will occur at 3-months and 6-months  
58  
59  
60



1  
2  
3 post-baseline if these timepoints differ from data collection timepoints during  
4 consultations with health professionals. Child and caregiver participants will be  
5 masked to the hypotheses. A Standard Protocol Items Recommendations for  
6  
7  
8  
9  
10  
11  
12  
13  
14  
15  
16  
17  
18  
19  
20  
21  
22  
23  
24  
25  
26  
27  
28  
29  
30  
31  
32  
33  
34  
35  
36  
37  
38  
39  
40  
41  
42  
43  
44  
45  
46  
47  
48  
49  
50  
51  
52  
53  
54  
55  
56  
57  
58  
59  
60

post-baseline if these timepoints differ from data collection timepoints during consultations with health professionals. Child and caregiver participants will be masked to the hypotheses. A Standard Protocol Items Recommendations for Interventional Trials (SPIRIT) flow diagram has been used to report the schedule for enrolment, interventions and evaluations for the effectiveness component of the study (Figure 1).

The study design and evaluation plan have been informed by the Consolidated Framework for Implementation Research. This framework covers the physical and social environment, values, individual motivation and capacity factors which are considered important for the intervention being tested and has been derived from 33 theories relating to implementation [27]. This Protocol paper has been prepared following the eHealth Consolidated Standards of Reporting Trials (CONSORT) guidelines.

## Participants

### Inclusion criteria

Children with burn scars and infantile haemangiomas, aged 0 to 16 years at the time of recruitment, who require ongoing management in the hospital setting, and their caregivers aged 18 years or older will be included. Ongoing management is defined as children who require one or more ongoing hospital consultations with clinicians at the study setting beyond baseline in the 6-month post-baseline intervention period for the prevention or management of skin conditions as determined by treating clinicians at baseline. Treating clinicians will also be asked to determine children's ability to complete PROMs electronically based on their physical condition and

1  
2  
3 knowledge of the family (i.e., to determine if bilateral hand burns would prevent  
4 sufficient movement of their hands to use an iPad).  
5  
6  
7

#### 8 9 Exclusion criteria

10  
11 Children and caregivers will not be eligible to participate if they are involved with  
12 child protection services and it is difficult to obtain consent, where circumstances  
13 interfere with the participant's ability to give informed consent (i.e., diminished  
14 understanding or comprehension), or where there is difficulty speaking or  
15 understanding written English as the PROMs are only available for the study in  
16 English.  
17  
18  
19  
20  
21  
22  
23

#### 24 25 Sample size estimate

26  
27 The sample size was based on recruitment feasibility. A retrospective audit of child  
28 and caregiver participants of clinic attendees suggested at least 35 participants in  
29 each clinic can be recruited in the intervention period. In terms of the effectiveness  
30 randomised controlled trial, if outcome data is available for 70 participants overall,  
31 then with 80% power we will be able to detect an effect size for the difference  
32 between-arms of 0.68 standard deviation units or greater for proxy-reported overall  
33 health-related quality of life at 6-months post-baseline ( $\alpha=0.05$ ). A between  
34 group difference of 0.68 is considered clinically meaningful at the individual level by  
35 expert clinicians, as a medium to large effect is regarded as offsetting the burden of  
36 completion of ePROMs to patients and families and supporting implementation  
37 routinely in clinics. To account for twenty percent attrition expected at 6-month  
38 follow-up based on a prior study with children and caregivers completing patient-  
39 reported outcome measures in the burns clinic setting [28], recruitment will continue  
40 until 88 participants have been randomised to groups.  
41  
42  
43  
44  
45  
46  
47  
48  
49  
50  
51  
52  
53  
54  
55  
56  
57  
58  
59  
60

1  
2  
3 Interviews will be conducted with the following groups during implementation with  
4 numbers of participants represented approximately equally for each clinic: children  
5 with a skin condition, their caregivers and treating health professionals. Interviews  
6 will continue until saturation (i.e. the point at which no further dimensions, nuances,  
7 or insights of issues are identified) [29] building on interview data generated pre-  
8 implementation. A greater number of child interviews will be required than caregiver  
9 and health professional interviews based on our previous experience of generally  
10 obtaining shorter interviews of 15 to 20 minutes in children with burn scars than with  
11 caregivers and health professionals.  
12  
13  
14  
15  
16  
17  
18  
19  
20  
21  
22  
23  
24  
25

## 26 **Evaluation**

### 27 Effectiveness outcomes

28  
29 Study outcome measures will be self-completed by children aged 8 years or older  
30 and proxy-completed by caregivers for younger children. The primary outcome  
31 assessed will be change in the child's generic overall health across both clinics  
32 measured using The Pediatric Quality of Life Inventory (PedsQL™ 4.0 Generic Core  
33 and Infant Scales proxy-report total score) [18,19]. Secondary outcomes will be: (a)  
34 change in the child's generic overall health across both clinics measured using The  
35 Pediatric Quality of Life Inventory (PedsQL™ 4.0 Generic Core and Infant Scales  
36 [30], child report total score); b) change in the child's psychosocial and physical  
37 health across both clinics measured using The Pediatric Quality of Life Inventory;  
38 proxy and child report respective subscales; c) change in the child's generic health  
39 across both clinics measured using proxy and child report of individual items of the  
40 Child Health Utility (CHU-9D) and utility score [25]; d) condition-specific health-  
41 related quality of life of the child (overall impact, sensory intensity, sensory  
42  
43  
44  
45  
46  
47  
48  
49  
50  
51  
52  
53  
54  
55  
56  
57  
58  
59  
60

1  
2  
3 frequency, sensory impact, mobility, daily living, friendships and social interaction,  
4 appearance, emotional reactions, and physical symptoms) measured using  
5  
6 respective subscales of the Brisbane Burn Scar Impact Profile [burn scar clinic group  
7  
8 only]; e) condition-specific health-related quality of life of parents (worry and impact)  
9  
10 measured using respective subscales of the Brisbane Burn Scar Impact Profile  
11  
12 respective subscales [burn scar clinic group only]; f) condition-specific health-related  
13  
14 quality of life of the child (physical symptoms, social interactions, emotional  
15  
16 functioning, psychosocial functioning) measured using respective subscales of the  
17  
18 Infantile Hemangioma Quality of Life Scale [infantile hemangioma vascular clinic  
19  
20 group only]; g) condition-specific health-related quality of life of parents  
21  
22 (psychosocial functioning, negative mood, and self-worth) measured using  
23  
24 respective subscales of the CARE parent questionnaire [burn scar clinic group only];  
25  
26 h) condition-specific health-related quality of life of parents (relationship and work,  
27  
28 budget) measured using the relationships and work dimension and single budget  
29  
30 item of the Hemangioma Family Burden questionnaire; i) number and type of  
31  
32 referrals for the child or caregiver; and j) caregiver overall satisfaction with treatment.  
33  
34  
35  
36  
37  
38  
39  
40 Caregiver overall satisfaction with treatment was based on the finding that  
41  
42 significantly more intervention patients reported satisfaction with overall care in a  
43  
44 study of children with diabetes, which was the only paediatric study that examined  
45  
46 this outcome in a recent systematic review [4]. The number and type of referrals was  
47  
48 included as an outcome based on the findings of three paediatric studies identified in  
49  
50 a recent systematic review, in which two studies reported an increase in the referral  
51  
52 rates in the intervention group, and one study identified no difference in referral rates  
53  
54 between intervention and control groups [9]. A description of each of the outcomes  
55  
56 and psychometric properties of outcomes are reported in Supplementary File 1.  
57  
58  
59  
60

1  
2  
3 Adverse effects of the PROM interventions will be monitored using the self-report of  
4 caregiver and child participants (where appropriate), treating health professionals as  
5 well as by monitoring of the PROM data by investigators.  
6  
7  
8  
9  
10

## 11 Other outcomes

12 Sociodemographic data collected from or about caregivers will include the  
13 caregiver's relationship to the child, level of education, ethnicity, work status,  
14 household income, and postcode; and from children aged 8 years or older or  
15 caregivers about their children will include, gender, ethnicity, education level, scar  
16 location and comorbidities of the child participants. Clinical data collected from  
17 electronic medical records will be percent total body surface area, percent full  
18 thickness burn, length of time post-burn, type of healing (e.g., spontaneous skin  
19 healing versus split thickness graft), type of burn, and length of time to re-  
20 epithelialisation, medications and complications during the study period.  
21  
22  
23  
24  
25  
26  
27  
28  
29  
30  
31  
32  
33  
34

## 35 Effectiveness evaluation

36 An intention to treat analysis will be the primary approach but per protocol analyses  
37 will be compared to the intention to treat approach to examine the effect of those  
38 who didn't receive the intervention as intended. The key sociodemographic and  
39 clinical characteristic data that will be examined for baseline differences between the  
40 groups will be age, gender, education, household income, socioeconomic status of  
41 the neighbourhood where the family reside based on postcode, severity of baseline  
42 symptoms and health-related quality of life, body location of the condition, visibility of  
43 the condition (scars on the head, neck, face or hands), and time since the skin  
44 condition commenced or injury occurred. The primary comparison will be completed  
45 using data from caregivers for children aged younger than 8-years.  
46  
47  
48  
49  
50  
51  
52  
53  
54  
55  
56  
57  
58  
59  
60

## Effectiveness analysis

Primary outcome comparison at 6-month post-baseline will be based on overall health from the Pediatric Evaluation of Quality of Life Inventory between the PEDS-ePROM and ePROM comparison group using linear mixed-effects models that account for repeated observations from the same child and clustering within clinics and within treating health professionals. Covariables will be included for potentially confounding variables if any differences between groups are identified for key sociodemographic and clinical characteristics at baseline.

A sensitivity analysis will be conducted using imputation techniques to replace non-ignorable data that is considered to be missing at random over the follow-up period, to determine whether bias is likely in the complete case analysis. Secondary outcome comparisons will be conducted at 6-months post-baseline using linear mixed-effects models where appropriate. Multi-level or nested hierarchical analysis will examine the effect of clinic and treating health professional effects by examining patient clustering within clinics, and surgeons and occupational therapists clustered within clinics. The amount and type of missing data will be reported using descriptive statistics. The maximum potential effect of the intervention with children will be analysed according to the treatment actually received (an 'as treated' analysis incorporating treatment dose received). Data analysis will be conducted using Stata 16.0 (Statacorp, College Station, TX, USA).

## Implementation outcomes

Implementation will be considered successful if graphical displays of result summaries are presented to treating clinicians immediately prior to more than 85% of consultations where a patient is randomised to receive a report, and if PROMs and summaries are filed in electronic medical records for more than 75% of patients

1  
2  
3 eligible to have PROM data provided to treating clinicians in the intervention period.  
4

5 The implementation outcomes of acceptability and sustainability [31] will be used to  
6  
7 determine the overall success of the implementation. The implementation outcomes  
8  
9 of acceptability, sustainability, cost, fidelity and contextual factors are detailed in

10  
11  
12 Table 2.  
13  
14  
15  
16  
17  
18  
19  
20  
21  
22  
23  
24  
25  
26  
27  
28  
29  
30  
31  
32  
33  
34  
35  
36  
37  
38  
39  
40  
41  
42  
43  
44  
45  
46  
47  
48  
49  
50  
51  
52  
53  
54  
55  
56  
57  
58  
59  
60

For peer review only

Table 2 Description of the implementation outcomes

| Outcome                                              | Detailed description of the outcome                                                                                                                                                                                                                                                                                                                                                                                                                                                                                                                                                                                                                                                                                                                                                                                                                                                                                                         | Data type, source and analysis                                                                                                                                                                                                                                                                                                |
|------------------------------------------------------|---------------------------------------------------------------------------------------------------------------------------------------------------------------------------------------------------------------------------------------------------------------------------------------------------------------------------------------------------------------------------------------------------------------------------------------------------------------------------------------------------------------------------------------------------------------------------------------------------------------------------------------------------------------------------------------------------------------------------------------------------------------------------------------------------------------------------------------------------------------------------------------------------------------------------------------------|-------------------------------------------------------------------------------------------------------------------------------------------------------------------------------------------------------------------------------------------------------------------------------------------------------------------------------|
| Acceptability of ePROM interventions and evaluation* | <p>The acceptability of the ePROM interventions and evaluation by families of children with health conditions and treating clinicians including content, complexity, delivery and relative advantage [31].*</p> <ol style="list-style-type: none"> <li>1. <math>\geq 80\%</math> of families will take &lt;15 minutes to complete the ePROMs as previous research has identified that PROMs that are fast to complete are most acceptable to clinicians and families [32].</li> <li>2. <math>\geq 50\%</math> of families completed ePROMs across all scheduled consultations that were eligible to be included in the study, where consultations eligible to be included were limited to one consultation over any 1-month period. Based on pre-intervention phase interviews and field notes of what was considered acceptable for ongoing implementation of the PROMs routinely in clinical practice in the study clinics and</li> </ol> | <p>Quantitative: Electronic study data and administrative data; descriptive analysis</p> <p>Qualitative: interview and field note data; thematic analysis including mapping to CFIR innovation constructs (e.g., relative advantage, adaptability, complexity, cost in the pre-implementation and implementation stages).</p> |



1  
2  
3  
4  
5  
6  
7  
8  
9  
10  
11  
12  
13  
14  
15  
16  
17  
18  
19  
20  
21  
22  
23  
24  
25  
26  
27  
28  
29  
30  
31  
32  
33  
34  
35  
36  
37  
38  
39  
40  
41  
42  
43  
44  
45  
46

---

evidence indicating completion rates of 75% were achieved for system-wide implementation of PROMs at a Canadian children’s hospital [33].

- 3. Phone reminders for PROM completion were required in ≤50% of families. This outcome was based on feedback from clinicians in the pre-implementation phase indicating that phone call reminders for this type of intervention are a burden to clinicians and may impact uptake by clinicians.
- 4. Technology-related issues with graphical displays of result summaries or ePROM completion were present for ≤10% of families across all eligible appointments.
- 5. ≥75% of participants eligible to have ePROM data provided to treating clinicians had intervention ePROMs and graphical displays filed in electronic medical records.

Sustainability of ePROM interventions and evaluation

The extent to which the ePROM intervention (or a modification of the intervention) was continued or planned to be continued in routine clinical practice at the end of the study, and barriers and facilitators of sustained use.

Qualitative: Interviews with child, caregiver and health professional participants and field notes; analysed using

thematic analysis and mapping to CFIR (e.g., knowledge and beliefs about the intervention, design quality and packaging, needs and resources)

Qualitative: interview data relating to cost.

Quantitative: Study and administrative data, medical records, hospital clinical costings department data.

Qualitative: Verbal fidelity reports and interviews with children and caregivers, and interviews with health professional participants

1  
2  
3  
4  
5  
6  
7  
8  
9  
10  
11  
12  
13  
14  
15 Cost

The cost of implementing the intervention for patients in the intervention and control groups based on resource use from the perspective of the health service.

Data for healthcare resource utilisation for co-interventions for skin treatment (e.g. medicines, complementary treatments), and details of hospital presentations), will be included.

16  
17  
18  
19  
20  
21  
22  
23  
24  
25  
26  
27  
28  
29 Fidelity

The extent to which the interventions were delivered and received as intended.

- 30  
31  
32  
33  
34  
35  
36  
37  
38  
39  
40  
41  
42  
43  
44  
45  
46
1. Dose of the intervention: Child and caregiver verbal report of the topics on the graphical displays of ePROM results that were discussed during the

1  
2  
3  
4  
5  
6  
7  
8  
9  
10  
11  
12  
13  
14  
15  
16  
17  
18  
19  
20  
21  
22  
23  
24  
25  
26  
27  
28  
29  
30  
31  
32  
33  
34  
35  
36  
37  
38  
39  
40  
41  
42  
43  
44  
45  
46

consultation in the intervention group, immediately after the consultation.

and field notes

2. Dose of the intervention: percentage of eligible consultations for each participant where ePROM data was completed in advance of the consultation as scheduled.

Quantitative: Study data, descriptive analysis

3. The number (percentage) of participants randomised to receive graphical displays of result summaries versus the number of participants who actually had graphical displays of result summaries delivered to consultations.

4. Amount and type of missing intervention-related ePROM data on Qualtrics<sup>XM</sup> [25].

#### Contextual factors

Barriers and facilitators to multi-level implementation of the intervention and the evaluation; at the individual level, clinic level, hospital level, and outside the hospital setting.

Qualitative: Interviews with child, caregiver and health professional participants; and field notes analysed using thematic analysis and mapping to CFIR (e.g., culture, networks and

communication,  
implementation cost)

---

\* Children  $\geq 8$  years will self-report; caregivers will provide proxy-reports for children aged  $< 8$  years except for satisfaction with treatment which will only be self-reported by caregivers.

ePROMs, electronic patient-reported outcome measures; CFIR, Consolidated Framework for Implementation Research

For peer review only

### Implementation evaluation

Implementation outcomes will be evaluated using interviews; health service, administrative, clinical costings and missing data; observational field notes of meetings and each clinic attended or planned; meeting minutes and study emails; and fidelity reports. Acceptability is defined as the perception among stakeholders that a treatment, service, practice or innovation is agreeable or satisfactory [31]. Sustainability is defined as the extent that a newly implemented treatment is maintained within a service setting's ongoing, stable operations [31]. The data from these sources will be mapped to the Consolidated Framework for Implementation Research [27]. This framework can be used to understand barriers and facilitators to implementing the intervention at the level of individuals, the organisational level and settings external to the organisation which can assist in determining the sustainability and potential scaling up of the intervention. Factors related to implementation delivery that might have impacted on the intervention effectiveness will also be examined to understand whether and how the expected outcomes were achieved, and the reasons for this.

Fidelity of the intervention will be taken from study records kept by researchers.

Immediately after face-to-face consultations caregivers and children (where appropriate) will be requested to verbally report the graphical display topics that were discussed during the consultation in the intervention group.

### Implementation analysis

Interpretive Description [34] will be used to thematically analyse the data. This qualitative analysis uses elements from several other qualitative methodologies including phenomenology, grounded theory, and ethnography without focusing on

1  
2  
3 any specific technique [34]. Interpretive Description is ideal for applied clinical  
4 questions and analysis of a wide range of data sources [34]. The analysis builds on  
5 what is known in terms of current practices and structures of health services and  
6 what is known and not known [34]. Data analysis will be conducted iteratively,  
7 concurrently with interviews, with analysis conducted during the implementation  
8 phase building on analysis of pre-implementation interviews. Framework analysis  
9 [35] will then be applied deductively, mapping the qualitative and quantitative data  
10 (e.g., verbatim quotes and descriptive statistics) to the pre-defined key constructs of  
11 the Consolidated Framework for Implementation Research as overarching themes.  
12 The data will be organised into a framework matrix where columns are codes and  
13 rows are participants [35]. This analysis is conducted across participants as well as  
14 within participants. Steps in framework analysis include familiarization; indexing;  
15 charting; and synthesising [35]. Pre-implementation and post-implementation  
16 differences will be examined, and themes that emerge in addition to the  
17 Consolidated Framework for Implementation Research constructs, will be added to  
18 the framework. Positive and negative participant quotes and descriptive data will be  
19 examined separately for each construct in the framework to determine influences on  
20 implementation and the strength of each construct, for each clinics as well as across  
21 clinics [36]. Once mapping to the Consolidated Framework for Implementation  
22 Research has been completed, data that applies to the implementation outcomes of  
23 acceptability, sustainability, fidelity and contextual factors will then be summarised.

24 Interviews will be audio recorded and transcribed verbatim by study personnel.  
25 Recordings will be stored in a coded form on a secure password protected folder  
26 within The University of Queensland until coding has been completed, accessible to  
27  
28  
29  
30  
31  
32  
33  
34  
35  
36  
37  
38  
39  
40  
41  
42  
43  
44  
45  
46  
47  
48  
49  
50  
51  
52  
53  
54  
55  
56  
57  
58  
59  
60

1  
2  
3 two of the investigators and a research assistant. The credibility of the analysis will  
4 be checked using member checking of the interview data, independent coding of the  
5 data by two researchers of at least 20 percent of the data, triangulation of the results  
6 across participant groups (managers, treating health professionals, caregiver and  
7 child participants) and using field notes, and reflective journaling. Microsoft excel  
8 (version 16, Microsoft Corporation) and NVivo (version 10, QSR International,  
9 Doncaster, Victoria, Australia [37]) will be used to organise and code the data.

### 19 Electronic platform

20  
21 The electronic survey platform Qualtrics<sup>XM</sup> [25] was chosen to administer the  
22 PROMs and to provide graphical displays of result summaries based on visual  
23 aesthetics of the graphical displays compared to other survey programs and prior  
24 experience of the investigators using the program. Features of the program that were  
25 important for administration of the chosen surveys and study design were the ability  
26 to have open-ended text, email distribution, ability to send reminders, display  
27 longitudinal responses, a recoding values function, automated scoring functionality,  
28 and links to NVivo software [37] for coding open text responses.

### 39 Patient and public involvement

40  
41 Children aged 8 years and older with life-altering skin conditions, caregivers of  
42 children with life-altering skin conditions and treating health professionals in the  
43 study setting were involved in all study phases including development of the  
44 intervention, process evaluation, study design and implementation evaluation. These  
45 stakeholder groups reported on the burden of the planned intervention, potential time  
46 required to participate and acceptability of follow-up intervals in pre-implementation  
47 interviews. Plans include forming a stakeholder reference group to inform the  
48 interpretation and sustainability of the study findings.

## DISCUSSION

To our knowledge studies of PROM interventions have not previously focused on children with life-altering skin conditions. A pragmatic approach has been taken to maximise relevance to the clinical context including limiting exclusion criteria, and developing and delivering an intervention that has limited interference with the running of very busy outpatient clinics. If the intervention is shown to have promising short-term results then secondary prevention impacts particularly on emotional health of caregivers may be likely and the benefits higher in the longer term which will be examined in the future.

An outcome of the proposed study may be refinement of the PEDS-ePROM intervention based on mapping to the Consolidated Framework for Implementation Research which may identify additional elements that should be considered. The findings will also likely inform the design of a multisite cluster effectiveness-implementation study of a patient-reported outcome measure intervention in these children which may reduce the risk of contamination bias [8]. Information obtained will inform ongoing efforts in paediatric care to use patient-reported outcome measures as part of routine clinical care.

### Strengths and limitations

Strengths of the study include the involvement of stakeholders representing multiple perspectives (children, caregivers, health professionals) in the development of the intervention and the process evaluation, and the focus of the intervention and process evaluation on health-related quality of life. The use of the Consolidated Framework for Implementation Research is also a strength. Theory-based interventions tend to be more effective than non-theory based interventions [38].



1  
2  
3 More specifically, the current study will seek to understand how the inner setting of  
4 the organisation (i.e., organisational culture and structural characteristics) impacts on  
5 implementation which has been identified as a research gap [10].  
6  
7  
8  
9

10  
11  
12 The lack of masking of treating health professionals and participants in the  
13 randomised controlled trial is a limitation although masking is not possible as the  
14 outcomes are patient or proxy-reported and it will be clear to most participants when  
15 results are presented in consultations. However, child and caregiver participants will  
16 be masked to the hypotheses. Potential contamination bias has also been raised as  
17 a possibility in trials of this nature where several clinics within a facility are included,  
18 as treating health professionals' awareness of issues that should be focused on may  
19 be raised, diluting the impact of the intervention [39].  
20  
21  
22  
23  
24  
25  
26  
27  
28  
29  
30

31  
32  
33 A limitation is the lack of inclusion of families from non-English speaking  
34 backgrounds and some cultural groups. Further attention is required to develop and  
35 test PROM interventions for families from specific cultural backgrounds which is a  
36 challenge in the study setting where people from many cultural backgrounds are  
37 seen. Specifically, people of Aboriginal and Torres Strait Islander descent were not  
38 involved in the development process thus the intervention and study design may not  
39 be acceptable for this group of people and should be established.  
40  
41  
42  
43  
44  
45  
46  
47  
48

#### 49 **Ethical approval and dissemination**

50  
51 Ethical approval has been received from Children's Health Queensland Hospital and  
52 Health Service Human Research Ethics Committee (HREC/19/QCHQ/56290), The  
53 University of Queensland (2019002233), and Queensland University of Technology  
54 (1900000847).  
55  
56  
57  
58  
59  
60

1  
2  
3  
4  
5  
6  
7  
8  
9  
10  
11  
12  
13  
14  
15  
16  
17  
18  
19  
20  
21  
22  
23  
24  
25  
26  
27  
28  
29  
30  
31  
32  
33  
34  
35  
36  
37  
38  
39  
40  
41  
42  
43  
44  
45  
46  
47  
48  
49  
50  
51  
52  
53  
54  
55  
56  
57  
58  
59  
60

Written consent will be obtained from caregiver and treating health professional participants once written and verbal information has been provided. Caregivers will be encouraged to discuss the study with children who can communicate with their caregivers prior to consent being obtained. Adverse effects will be reported to the Children's Health Queensland Hospital and Health Service and Human Research Ethics Committees.

For peer review only

## References

1. De Rosis S, Cerasuolo D, Nuti S. Using patient-reported measures to drive change in healthcare: the experience of the digital, continuous and systematic PREMs observatory in Italy. *BMC Health Serv Res* 2020;**20**(1):315.
2. Basch E. Patient-Reported Outcomes - Harnessing Patients' Voices to Improve Clinical Care. *N Engl J Med* 2017;**376**(2):105-08.
3. Field J, Holmes MM, Newell D. PROMs data: can it be used to make decisions for individual patients? A narrative review. *Patient Relat Outcome Meas* 2019;**10**:233-41.
4. Ishaque S, Karnon J, Chen G, et al. A systematic review of randomised controlled trials evaluating the use of patient-reported outcome measures (PROMs). *Qual Life Res* 2019;**28**(3):567-92.
5. de Wit M, Delemarre-van de Waal HA, Bokma JA, et al. Monitoring and discussing health-related quality of life in adolescents with Type 1 diabetes improve psychosocial well-Being. *Diabetes Care* 2008;**31**(8):1521.
6. Wolfe J, Orellana L, Cook EF, et al. Improving the care of children with advanced cancer by using an electronic patient-reported feedback intervention: results from the PediQUEST randomized controlled trial. *J Clin Oncol* 2014;**32**(11):1119-26.
7. Bickman L, Douglas SR, De Andrade ARV, et al. Implementing a Measurement Feedback System: A Tale of Two Sites. *Adm Policy Ment Health* 2016;**43**(3):410-25.
8. de Jong RK, Snoek H, Staal WG, et al. The effect of patients' feedback on treatment outcome in a child and adolescent psychiatric sample: a randomized controlled trial. *Eur Child Adolesc Psy* 2019;**28**(6):819-34.
9. Bele S, Chugh A, Mohamed B, Teela L, Haverman L, Santana MJ. Patient-reported outcome measures in routine pediatric clinical care: A systematic review. *Front Pediatr*. 2020 Jul 28;**8**:364.
10. Foster A, Croot L, Brazier J, et al. The facilitators and barriers to implementing patient reported outcome measures in organisations delivering health related services: a systematic review of reviews. *J Patient Rep Outcomes* 2018;**2**(1):46.

- 1  
2  
3 11. Michie S, Carey RN, Johnston M, et al. From theory-inspired to theory-based  
4 interventions: A protocol for developing and testing a methodology for linking  
5 behaviour change techniques to theoretical mechanisms of action. *Ann Behav*  
6 *Med* 2017;**52**(6):501-12.
- 7  
8  
9 12. Ahmed, S., Zidarov, D., Eilayyan, O. *et al.* Prospective application of  
10 implementation science theories and frameworks to inform use of PROMs in  
11 routine clinical care within an integrated pain network. *Qual Life Res* (2020).  
12 <https://doi.org/10.1007/s11136-020-02600-8>
- 13  
14  
15 13. Maskell J, Newcombe P, Martin G, et al. Psychosocial Functioning Differences in  
16 Pediatric Burn Survivors Compared With Healthy Norms. *J Burn Care Res*  
17 2013;**34**(4):465-76.
- 18  
19  
20 14. Spuls PI, Gerbens LAA, Simpson E, et al. Patient-Oriented Eczema Measure  
21 (POEM), a core instrument to measure symptoms in clinical trials: a  
22 Harmonising Outcome Measures for Eczema (HOME) statement. *Br J*  
23 *Dermatol* 2017;**176**(4):979-84.
- 24  
25  
26 15. Chan EKH, Edwards TC, Haywood K, et al. Implementing patient-reported  
27 outcome measures in clinical practice: a companion guide to the ISOQOL  
28 user's guide. *Qual Life Res* 2019;**28**(3):621-27.
- 29  
30  
31 16. Kramer JM, Schwartz A. Reducing Barriers to Patient-Reported Outcome  
32 Measures for People With Cognitive Impairments. *Arch Phys Med Rehabil*  
33 2017;**98**(8):1705-15.
- 34  
35  
36 17. Simons M, Price N, Kimble R, et al. Patient experiences of burn scars in adults  
37 and children and development of a health-related quality of life conceptual  
38 model: A qualitative study. *Burns* 2016;**42**(3):620-32.
- 39  
40  
41 18. Varni JW, Limbers CA, Neighbors K, et al. The PedsQL Infant Scales: feasibility,  
42 internal consistency reliability, and validity in healthy and ill infants. *Qual Life*  
43 *Res* 2011;**20**(1):45-55.
- 44  
45  
46 19. Varni JW, Seid M, Knight TS, et al. The PedsQLTM 4.0 Generic Core Scales:  
47 Sensitivity, Responsiveness, and Impact on Clinical Decision-Making. *J*  
48 *Behav Med* 2002;**25**(2):175-93.
- 49  
50  
51 20. Wiebe S, Guyatt G, Weaver B, et al. Comparative responsiveness of generic and  
52 specific quality-of-life instruments. *J Clin Epidemiol* 2003;**56**:52–60.
- 53  
54  
55 21. Tyack Z, Ziviani J, Kimble R, et al. Measuring the impact of burn scarring on  
56 health-related quality of life: Development and preliminary content validation  
57  
58  
59  
60

- of the Brisbane Burn Scar Impact Profile (BBSIP) for children and adults. *Burns* 2015;**41**(7):1405-19.
22. Griffiths C, D. H. CARe Burn Scales- Parent Quality of Life Form Version 1, 2018.
23. Boccara O, Meni C, Leaute-Labreze C, et al. Haemangioma family burden: creation of a specific questionnaire. *Acta Derm Venereol* 2015;**95**(1):78-82.
24. Chamlin SL, Mancini AJ, Lai JS, et al. Development and Validation of a Quality-of-Life Instrument for Infantile Hemangiomas. *J Invest Dermatol* 2015;**135**(6):1533-39.
25. Qualtrics. Qualtrics: Survey Research Suite. 2014; Available from: <http://www.qualtrics.com/> (Accessed June 16 2020).
26. Curran GM, Bauer M, Mittman B, et al. Effectiveness-implementation hybrid designs: combining elements of clinical effectiveness and implementation research to enhance public health impact. *Med Care* 2012;**50**(3):217-26.
27. Damschroder LJ, Aron DC, Keith RE, et al. Fostering implementation of health services research findings into practice: a consolidated framework for advancing implementation science. *Implement Sci* 2009;**4**(1):50.
28. Wiseman J, Ware R, Simons M, et al. Effectiveness of topical silicone gel and pressure garment therapy for burn scar prevention and management in children: a randomized controlled trial. *Clin Rehabil* 2020; **34**(1): 120–31.
29. Vasileiou K, Barnett J, Thorpe S, et al. Characterising and justifying sample size sufficiency in interview-based studies: systematic analysis of qualitative health research over a 15-year period. *BMC Med Res Methodol* 2018;**18**(1):148-48.
30. Stevens K. Valuation of the Child Health Utility 9D Index. *PharmacoEconomics* 2012;**30**(8):729-47.
31. Proctor E, Silmere H, Raghavan R, et al. Outcomes for implementation research: conceptual distinctions, measurement challenges, and research agenda. *Adm Policy Ment Health* 2011;**38**(2):65-76.
32. Teela L, van Muilekom MM, Kooij LH, et al. Clinicians' perspective on the implemented KLIK PROM portal in clinical practice. *Qual Life Res* 2020.
33. Gerhardt WE, Mara CA, Kudel I, Morgan EM, Schoettker PJ, Napora J, Britto MT, Alessandrini EA. Systemwide Implementation of Patient-Reported Outcomes in Routine Clinical Care at a Children's Hospital. *Jt Comm J Qual Patient Saf.* 2018;**44**(8):441-53.

- 1  
2  
3 34. Thorne. S. *Interpretive Description: Qualitative Research for Applied Practice*.  
4 Second ed. New York: Routledge, 2016.  
5  
6 35. Gale NK, Heath G, Cameron E, et al. Using the framework method for the  
7 analysis of qualitative data in multi-disciplinary health research. *BMC Med*  
8 *Res Methodol* 2013;**13**:117-17.  
9  
10 36. Varsi C, Ekstedt M, Gammon D, et al. Using the Consolidated Framework for  
11 Implementation Research to Identify Barriers and Facilitators for the  
12 Implementation of an Internet-Based Patient-Provider Communication Service  
13 in Five Settings: A Qualitative Study. *J Med Internet Res*. 2015;**17**(11):e262.  
14  
15 37. NVivo 10 [software program]. Version 10. QSR International.  
16 [http://www.qsrinternational.com/products\\_nvivo.aspx](http://www.qsrinternational.com/products_nvivo.aspx) (Accessed June 16,  
17 2020).  
18  
19 38. Albarracín D, Gillette JC, Earl AN, et al. A Test of Major Assumptions About  
20 Behavior Change: A Comprehensive Look at the Effects of Passive and  
21 Active HIV-Prevention Interventions Since the Beginning of the Epidemic.  
22 *Psychological Bulletin* 2005;**131**(6):856-97.  
23  
24 39. Greenhalgh J, Dalkin S, Gooding K, et al. Functionality and feedback: a realist  
25 synthesis of the collation, interpretation and utilisation of patient-reported  
26 outcome measures data to improve patient care. *Health Services and Delivery*  
27 *Research* 2017;**5**(2).

### Author contributions

ZT designed the study with input from SM for the effectiveness evaluation, GH for the implementation evaluation, and RK and MS for integrating with existing clinical processes. ZT drafted the protocol and SM, MS, TZ, RW and RK critically revised the manuscript.

### Funding statement

This work was supported by a Health Services Research grant from the Children's Hospital Foundation, Brisbane, grant number 50297. The funder had no input into the design or conduct of the study.

### **Competing interests statement**

ZT, MS and RK developed the Brisbane Burn Scar Impact Profile which was included as a scar-specific measure in this study. MS and RK were clinical staff members of the health service where the study will be conducted at the time of submission.

### **Data sharing statement**

The final trial dataset will be available to chief investigators. The final trial dataset may be accessed with approval from the investigators if steps are undertaken to preserve the confidentiality of the data. Additional information regarding criteria for accessing data are available from the study investigators.

### **Acknowledgements**

Nil

### **Figure 1 legend**

SPIRIT flow diagram for the effectiveness study component\*

**Word count 4618**





## Supplementary File 1 Details of the outcomes in the intervention and effectiveness evaluation

| Outcome                                                          | Outcome measure                          | Participant of focus | Domains, subscales, items or versions used in the study                                                                        | Used in study intervention or evaluation | Description                                                                                                                                                                                                                                                                                                                                   | Psychometrics                                                                                                                                                                                                                               |
|------------------------------------------------------------------|------------------------------------------|----------------------|--------------------------------------------------------------------------------------------------------------------------------|------------------------------------------|-----------------------------------------------------------------------------------------------------------------------------------------------------------------------------------------------------------------------------------------------------------------------------------------------------------------------------------------------|---------------------------------------------------------------------------------------------------------------------------------------------------------------------------------------------------------------------------------------------|
| Generic health-related quality of life                           | CHU-9D                                   | Child                | 3 to 5 years (parent proxy)<br>5 to 7 years (parent proxy version)<br>7 to 8 years (parent proxy)<br>> 8 years version (child) | Evaluation                               | A measure of health-related quality of life that can be used with child aged 3 years and older. The parent proxy version for children aged 3 to 5 years has 10 items with an additional item on overall health compared to 9-item versions for other versions.                                                                                | A reliable and valid measure recommended for economic evaluations in paediatric settings [1-3]. 3-5 year version has not yet been validated (personal communication, Katherine Stevens). The item on schoolwork/homework has been modified. |
| Generic health-related quality of life (primary outcome measure) | PEDS-QL 4.0<br>Generic and Infant Scales | Child                | All items                                                                                                                      | Evaluation and intervention              | Generic 4.0 scale: 23 items, 4 domains (physical, emotional, social and school functioning), 3 summary scores (psychosocial health, physical health, total score). Scores will be transformed on a 0 to 100 and scored as recommended by the developers (Mapi Research Trust and Varni, 2017, scaling and scoring, version 17, available from | Validation (including reproducibility and responsiveness testing) supported for children with acute and chronic conditions including those in a hospital setting [4,5].                                                                     |

<http://www.pedsqol.org/PedsQL-Scoring.pdf>, accessed 11.05.2020).

|                                                   |                                         |                     |           |                             |                                                                                                                                                                                                                                                                                                                                           |                                                                                                                                                                                                                                                                        |
|---------------------------------------------------|-----------------------------------------|---------------------|-----------|-----------------------------|-------------------------------------------------------------------------------------------------------------------------------------------------------------------------------------------------------------------------------------------------------------------------------------------------------------------------------------------|------------------------------------------------------------------------------------------------------------------------------------------------------------------------------------------------------------------------------------------------------------------------|
| Condition-specific health-related quality of life | The Brisbane Burn Scar Impact Profile   | Child and caregiver | All items | Evaluation and intervention | Groups of items measured were overall impact of burn scars; frequency and impact of itch, pain and other sensations; school, play and daily activities (includes mobility and activities of daily living items); friendships and social interactions; appearance; emotional reactions; physical symptoms; and parent and family concerns. | Content validity (children with burn scars and caregiver involvement in development) [6]. Psychometric testing in children and caregivers has largely supported longitudinal validity, reproducibility and responsiveness from around the time of wound healing [7,8]. |
| Condition-specific health-related quality of life | CARe Burn Scales                        | Caregiver           | 15 items  | Evaluation and intervention | Self-worth and negative mood parent scale items.                                                                                                                                                                                                                                                                                          | Content validity (caregivers of children with burns involved in development). Further validity testing is underway but not yet published (personal communication, Catrin Griffiths).                                                                                   |
| Condition-specific health-related quality of life | Haemangioma Family Burden Questionnaire | Child and caregiver | 4 items   | Evaluation and intervention | Four items from the 20-item questionnaire were included. Three items forming the relationship and work dimension were included (e.g.,                                                                                                                                                                                                     | Structural validity: internal coherence (Cronbach's $\alpha$ : 0.93). Construct validity: correlation with mental                                                                                                                                                      |

1  
2  
3  
4  
5  
6  
7  
8  
9  
10  
11  
12  
13  
14  
15  
16  
17  
18  
19  
20  
21  
22  
23  
24  
25  
26  
27  
28  
29  
30  
31  
32  
33  
34  
35  
36  
37  
38  
39  
40  
41  
42  
43  
44  
45  
46

|                                                   |                                                  |                     |                                |                             |                                                                                                                                                                                                                                                                                                   |                                                                                                                                                                                                                                    |
|---------------------------------------------------|--------------------------------------------------|---------------------|--------------------------------|-----------------------------|---------------------------------------------------------------------------------------------------------------------------------------------------------------------------------------------------------------------------------------------------------------------------------------------------|------------------------------------------------------------------------------------------------------------------------------------------------------------------------------------------------------------------------------------|
|                                                   |                                                  |                     |                                |                             | time spent with other children, impact of the haemangioma on career and stopping work). In addition the single item on budget and financial resources was included.                                                                                                                               | dimension of the Short-Form-12 (r = -0.75), and Psychological General Well-Being Index (r = -0.61). Discriminant validity: significant differences were found according to the size and location of the infantile haemangioma [9]. |
| Condition-specific health-related quality of life | Infantile Haemangioma Quality-of-Life Instrument | Child and caregiver | All items of the final measure | Evaluation and intervention | The 29 final items were included: 5 items targeting the child and the remainder targeting the caregiver. 4 subscales: child physical symptoms, child social interactions, parent emotional functioning, and parent psychosocial functioning.                                                      | Content validity (with parents involved in the development), test-retest reliability and structural validity supported [10].                                                                                                       |
| Satisfaction with treatment                       | Study specific                                   | Caregiver           | N/A                            | Evaluation                  | An 11-point condition specific numeric rating scale with anchors of very dissatisfied to very satisfied will be asked similar to the numeric rating scale used in a previous study by the authors with children with burn scars and their caregivers [11] at 3-months and 6-months post-baseline. | N/A                                                                                                                                                                                                                                |
| Referrals                                         | Study specific                                   | Child and caregiver | N/A                            | Evaluation                  | The number and type of referrals for child and caregiver                                                                                                                                                                                                                                          | N/A                                                                                                                                                                                                                                |

---

1  
2  
3  
4  
5  
6  
7  
8  
9  
10  
11  
12  
13  
14  
15  
16  
17  
18  
19  
20  
21  
22  
23  
24  
25  
26  
27  
28  
29  
30  
31  
32  
33  
34  
35  
36  
37  
38  
39  
40  
41  
42  
43  
44  
45  
46

participants to health professionals during 6-month intervention period, including psychosocial referrals. Referrals will be those made by health professional participants receiving result summaries in their consultations. Taken from medical records. Psychosocial referrals include referrals to social work, psychology, a general practitioner, or other health professional; where the referral is clearly for psychosocial support other than that provided by the health professionals delivering consultations in the effectiveness evaluation.

---

## References

1. Chen G, Flynn T, Stevens K, et al. Assessing the Health-Related Quality of Life of Australian Adolescents: An Empirical Comparison of the Child Health Utility 9D and EQ-5D-Y Instruments. *Value Health* 2015;**18**(4):432-8.
2. Stevens K. Valuation of the Child Health Utility 9D Index. *PharmacoEconomics* 2012;**30**(8):729-47.
3. Ratcliffe J, Flynn T, Terlich F, et al. Developing Adolescent-Specific Health State Values for Economic Evaluation. *PharmacoEconomics* 2012;**30**(8):713-27.
4. Desai AD, Zhou C, Stanford S, et al. Validity and responsiveness of the pediatric quality of life inventory (PedsQL) 4.0 generic core scales in the pediatric inpatient setting. *JAMA Pediatr* 2014;**168**(12):1114-21.
5. Varni JW, Seid M, Knight TS, et al. The PedsQLTM 4.0 Generic Core Scales: Sensitivity, Responsiveness, and Impact on Clinical Decision-Making. *J Behav Med* 2002;**25**(2):175-93.
6. Tyack Z, Ziviani J, Kimble R, et al. Measuring the impact of burn scarring on health-related quality of life: Development and preliminary content validation of the Brisbane Burn Scar Impact Profile (BBSIP) for children and adults. *Burns* 2015;**41**(7):1405-19.
7. Simons M, Kimble R, McPhail S, et al. The longitudinal validity, reproducibility and responsiveness of the Brisbane Burn Scar Impact Profile (caregiver report for young children version) for measuring health-related quality of life in children with burn scars. *Burns* 2019;**45**(8):1792-809.
8. Simons M, Kimble R, McPhail S, et al. The Brisbane Burn Scar Impact Profile (child and young person version) for measuring health-related quality of life in children with burn scars: A longitudinal cohort study of reliability, validity and responsiveness. *Burns* 2019;**45**(7):1537-52.
9. Boccara O, Meni C, Leaute-Labreze C, et al. Haemangioma family burden: creation of a specific questionnaire. *Acta Derm Venereol* 2015;**95**(1):78-82.
10. Chamlin SL, Mancini AJ, Lai JS, et al. Development and Validation of a Quality-of-Life Instrument for Infantile Hemangiomas. *J Invest Dermatol* 2015;**135**(6):1533-39.
11. Wiseman J, Ware RS, Simons M, et al. Effectiveness of topical silicone gel and pressure garment therapy for burn scar prevention and management in children: a randomized controlled trial. *Clin Rehabil* 2019;**34**(1):120-31.

# Reporting checklist for protocol of a clinical trial.

Based on the SPIRIT guidelines.

## Instructions to authors

Complete this checklist by entering the page numbers from your manuscript where readers will find each of the items listed below.

Your article may not currently address all the items on the checklist. Please modify your text to include the missing information. If you are certain that an item does not apply, please write "n/a" and provide a short explanation.

Upload your completed checklist as an extra file when you submit to a journal.

In your methods section, say that you used the SPIRIT reporting guidelines, and cite them as:

Chan A-W, Tetzlaff JM, Altman DG, Laupacis A, Gøtzsche PC, Krleža-Jerić K, Hróbjartsson A, Mann H, Dickersin K, Berlin J, Doré C, Parulekar W, Summerskill W, Groves T, Schulz K, Sox H, Rockhold FW, Rennie D, Moher D. SPIRIT 2013 Statement: Defining standard protocol items for clinical trials. *Ann Intern Med.* 2013;158(3):200-207

Reporting Item

Page Number

### Administrative

#### information

|       |                    |                                                                                                              |   |
|-------|--------------------|--------------------------------------------------------------------------------------------------------------|---|
| Title | <a href="#">#1</a> | Descriptive title identifying the study design, population, interventions, and, if applicable, trial acronym | 1 |
|-------|--------------------|--------------------------------------------------------------------------------------------------------------|---|

|    |                     |                     |                                                        |       |
|----|---------------------|---------------------|--------------------------------------------------------|-------|
| 1  | Trial registration  | <a href="#">#2a</a> | Trial identifier and registry name. If not yet         | 3     |
| 2  |                     |                     | registered, name of intended registry                  |       |
| 3  |                     |                     |                                                        |       |
| 4  |                     |                     |                                                        |       |
| 5  |                     |                     |                                                        |       |
| 6  | Trial registration: | <a href="#">#2b</a> | All items from the World Health Organization Trial     | n/a   |
| 7  |                     |                     | Registration Data Set                                  |       |
| 8  | data set            |                     |                                                        |       |
| 9  |                     |                     |                                                        |       |
| 10 |                     |                     |                                                        |       |
| 11 | Protocol version    | <a href="#">#3</a>  | Date and version identifier                            |       |
| 12 |                     |                     |                                                        |       |
| 13 |                     |                     |                                                        |       |
| 14 |                     |                     |                                                        |       |
| 15 | Funding             | <a href="#">#4</a>  | Sources and types of financial, material, and other    | 28    |
| 16 |                     |                     | support                                                |       |
| 17 |                     |                     |                                                        |       |
| 18 |                     |                     |                                                        |       |
| 19 |                     |                     |                                                        |       |
| 20 | Roles and           | <a href="#">#5a</a> | Names, affiliations, and roles of protocol             | 28    |
| 21 |                     |                     | contributors                                           |       |
| 22 | responsibilities:   |                     |                                                        |       |
| 23 |                     |                     |                                                        |       |
| 24 | contributorship     |                     |                                                        |       |
| 25 |                     |                     |                                                        |       |
| 26 |                     |                     |                                                        |       |
| 27 |                     |                     |                                                        |       |
| 28 | Roles and           | <a href="#">#5b</a> | Name and contact information for the trial sponsor     | n/a   |
| 29 |                     |                     |                                                        |       |
| 30 | responsibilities:   |                     |                                                        |       |
| 31 |                     |                     |                                                        |       |
| 32 | sponsor contact     |                     |                                                        |       |
| 33 |                     |                     |                                                        |       |
| 34 | information         |                     |                                                        |       |
| 35 |                     |                     |                                                        |       |
| 36 |                     |                     |                                                        |       |
| 37 |                     |                     |                                                        |       |
| 38 | Roles and           | <a href="#">#5c</a> | Role of study sponsor and funders, if any, in study    | 28    |
| 39 |                     |                     | design; collection, management, analysis, and          |       |
| 40 | responsibilities:   |                     | interpretation of data; writing of the report; and the |       |
| 41 |                     |                     | decision to submit the report for publication,         |       |
| 42 | sponsor and funder  |                     | including whether they will have ultimate authority    |       |
| 43 |                     |                     | over any of these activities                           |       |
| 44 |                     |                     |                                                        |       |
| 45 |                     |                     |                                                        |       |
| 46 |                     |                     |                                                        |       |
| 47 |                     |                     |                                                        |       |
| 48 |                     |                     |                                                        |       |
| 49 |                     |                     |                                                        |       |
| 50 |                     |                     |                                                        |       |
| 51 |                     |                     |                                                        |       |
| 52 | Roles and           | <a href="#">#5d</a> | Composition, roles, and responsibilities of the        | 3, 21 |
| 53 |                     |                     | coordinating centre, steering committee, endpoint      |       |
| 54 | responsibilities:   |                     | adjudication committee, data management team,          |       |
| 55 |                     |                     |                                                        |       |
| 56 | committees          |                     |                                                        |       |
| 57 |                     |                     |                                                        |       |
| 58 |                     |                     |                                                        |       |
| 59 |                     |                     |                                                        |       |
| 60 |                     |                     |                                                        |       |

and other individuals or groups overseeing the trial,  
if applicable (see Item 21a for data monitoring  
committee)

## Introduction

|    |                           |                     |                                                          |    |
|----|---------------------------|---------------------|----------------------------------------------------------|----|
| 11 | Background and            | <a href="#">#6a</a> | Description of research question and justification for   | 5  |
| 12 | rationale                 |                     | undertaking the trial, including summary of relevant     |    |
| 13 |                           |                     | studies (published and unpublished) examining            |    |
| 14 |                           |                     | benefits and harms for each intervention                 |    |
| 15 |                           |                     |                                                          |    |
| 16 |                           |                     |                                                          |    |
| 17 |                           |                     |                                                          |    |
| 18 |                           |                     |                                                          |    |
| 19 |                           |                     |                                                          |    |
| 20 |                           |                     |                                                          |    |
| 21 | Background and            | <a href="#">#6b</a> | Explanation for choice of comparators                    | 5  |
| 22 | rationale: choice of      |                     |                                                          |    |
| 23 | comparators               |                     |                                                          |    |
| 24 |                           |                     |                                                          |    |
| 25 |                           |                     |                                                          |    |
| 26 |                           |                     |                                                          |    |
| 27 |                           |                     |                                                          |    |
| 28 | Objectives                | <a href="#">#7</a>  | Specific objectives or hypotheses                        | 6  |
| 29 |                           |                     |                                                          |    |
| 30 |                           |                     |                                                          |    |
| 31 | Trial design              | <a href="#">#8</a>  | Description of trial design including type of trial (eg, | 12 |
| 32 |                           |                     | parallel group, crossover, factorial, single group),     |    |
| 33 |                           |                     | allocation ratio, and framework (eg, superiority,        |    |
| 34 |                           |                     | equivalence, non-inferiority, exploratory)               |    |
| 35 |                           |                     |                                                          |    |
| 36 |                           |                     |                                                          |    |
| 37 |                           |                     |                                                          |    |
| 38 |                           |                     |                                                          |    |
| 39 |                           |                     |                                                          |    |
| 40 |                           |                     |                                                          |    |
| 41 | <b>Methods:</b>           |                     |                                                          |    |
| 42 |                           |                     |                                                          |    |
| 43 | <b>Participants,</b>      |                     |                                                          |    |
| 44 | <b>interventions, and</b> |                     |                                                          |    |
| 45 | <b>outcomes</b>           |                     |                                                          |    |
| 46 |                           |                     |                                                          |    |
| 47 |                           |                     |                                                          |    |
| 48 |                           |                     |                                                          |    |
| 49 |                           |                     |                                                          |    |
| 50 |                           |                     |                                                          |    |
| 51 | Study setting             | <a href="#">#9</a>  | Description of study settings (eg, community clinic,     | 11 |
| 52 |                           |                     | academic hospital) and list of countries where data      |    |
| 53 |                           |                     | will be collected. Reference to where list of study      |    |
| 54 |                           |                     |                                                          |    |
| 55 |                           |                     |                                                          |    |
| 56 |                           |                     |                                                          |    |
| 57 |                           |                     |                                                          |    |
| 58 |                           |                     |                                                          |    |
| 59 |                           |                     |                                                          |    |
| 60 |                           |                     |                                                          |    |



|    |                      |                                                                             |        |
|----|----------------------|-----------------------------------------------------------------------------|--------|
| 1  |                      | sites can be obtained                                                       |        |
| 2  |                      |                                                                             |        |
| 3  |                      |                                                                             |        |
| 4  | Eligibility criteria | <a href="#">#10</a> Inclusion and exclusion criteria for participants. If   | 13,14  |
| 5  |                      | applicable, eligibility criteria for study centres and                      |        |
| 6  |                      | individuals who will perform the interventions (eg,                         |        |
| 7  |                      | surgeons, psychotherapists)                                                 |        |
| 8  |                      |                                                                             |        |
| 9  |                      |                                                                             |        |
| 10 |                      |                                                                             |        |
| 11 |                      |                                                                             |        |
| 12 |                      |                                                                             |        |
| 13 | Interventions:       | <a href="#">#11a</a> Interventions for each group with sufficient detail to | 8-10   |
| 14 | description          | allow replication, including how and when they will                         |        |
| 15 |                      | be administered                                                             |        |
| 16 |                      |                                                                             |        |
| 17 |                      |                                                                             |        |
| 18 |                      |                                                                             |        |
| 19 |                      |                                                                             |        |
| 20 |                      |                                                                             |        |
| 21 | Interventions:       | <a href="#">#11b</a> Criteria for discontinuing or modifying allocated      | n/a    |
| 22 | modifications        | interventions for a given trial participant (eg, drug                       |        |
| 23 |                      | dose change in response to harms, participant                               |        |
| 24 |                      | request, or improving / worsening disease)                                  |        |
| 25 |                      |                                                                             |        |
| 26 |                      |                                                                             |        |
| 27 |                      |                                                                             |        |
| 28 |                      |                                                                             |        |
| 29 |                      |                                                                             |        |
| 30 |                      |                                                                             |        |
| 31 | Interventions:       | <a href="#">#11c</a> Strategies to improve adherence to intervention        | 11, 16 |
| 32 | adherence            | protocols, and any procedures for monitoring                                |        |
| 33 |                      | adherence (eg, drug tablet return; laboratory tests)                        |        |
| 34 |                      |                                                                             |        |
| 35 |                      |                                                                             |        |
| 36 |                      |                                                                             |        |
| 37 |                      |                                                                             |        |
| 38 |                      |                                                                             |        |
| 39 | Interventions:       | <a href="#">#11d</a> Relevant concomitant care and interventions that       | 9,10   |
| 40 | concomitant care     | are permitted or prohibited during the trial                                |        |
| 41 |                      |                                                                             |        |
| 42 |                      |                                                                             |        |
| 43 |                      |                                                                             |        |
| 44 | Outcomes             | <a href="#">#12</a> Primary, secondary, and other outcomes, including       | 14-19  |
| 45 |                      | the specific measurement variable (eg, systolic                             |        |
| 46 |                      | blood pressure), analysis metric (eg, change from                           |        |
| 47 |                      | baseline, final value, time to event), method of                            |        |
| 48 |                      | aggregation (eg, median, proportion), and time point                        |        |
| 49 |                      | for each outcome. Explanation of the clinical                               |        |
| 50 |                      | relevance of chosen efficacy and harm outcomes is                           |        |
| 51 |                      |                                                                             |        |
| 52 |                      |                                                                             |        |
| 53 |                      |                                                                             |        |
| 54 |                      |                                                                             |        |
| 55 |                      |                                                                             |        |
| 56 |                      |                                                                             |        |
| 57 |                      |                                                                             |        |
| 58 |                      |                                                                             |        |
| 59 |                      |                                                                             |        |
| 60 |                      |                                                                             |        |

|    |                           |                                                                        |          |
|----|---------------------------|------------------------------------------------------------------------|----------|
| 1  |                           | strongly recommended                                                   |          |
| 2  |                           |                                                                        |          |
| 3  |                           |                                                                        |          |
| 4  | Participant timeline      | <a href="#">#13</a> Time schedule of enrolment, interventions          | Figure 1 |
| 5  |                           | (including any run-ins and washouts), assessments,                     |          |
| 6  |                           | and visits for participants. A schematic diagram is                    |          |
| 7  |                           | highly recommended (see Figure)                                        |          |
| 8  |                           |                                                                        |          |
| 9  |                           |                                                                        |          |
| 10 |                           |                                                                        |          |
| 11 |                           |                                                                        |          |
| 12 |                           |                                                                        |          |
| 13 | Sample size               | <a href="#">#14</a> Estimated number of participants needed to achieve | 14       |
| 14 |                           | study objectives and how it was determined,                            |          |
| 15 |                           | including clinical and statistical assumptions                         |          |
| 16 |                           | supporting any sample size calculations                                |          |
| 17 |                           |                                                                        |          |
| 18 |                           |                                                                        |          |
| 19 |                           |                                                                        |          |
| 20 |                           |                                                                        |          |
| 21 |                           |                                                                        |          |
| 22 |                           |                                                                        |          |
| 23 | Recruitment               | <a href="#">#15</a> Strategies for achieving adequate participant      | 11, 14   |
| 24 |                           | enrolment to reach target sample size                                  |          |
| 25 |                           |                                                                        |          |
| 26 |                           |                                                                        |          |
| 27 |                           |                                                                        |          |
| 28 |                           |                                                                        |          |
| 29 | <b>Methods:</b>           |                                                                        |          |
| 30 |                           |                                                                        |          |
| 31 | <b>Assignment of</b>      |                                                                        |          |
| 32 |                           |                                                                        |          |
| 33 | <b>interventions (for</b> |                                                                        |          |
| 34 |                           |                                                                        |          |
| 35 | <b>controlled trials)</b> |                                                                        |          |
| 36 |                           |                                                                        |          |
| 37 |                           |                                                                        |          |
| 38 |                           |                                                                        |          |
| 39 | Allocation:               | <a href="#">#16a</a> Method of generating the allocation sequence (eg, | 12       |
| 40 | sequence                  | computer-generated random numbers), and list of                        |          |
| 41 |                           | any factors for stratification. To reduce predictability               |          |
| 42 | generation                | of a random sequence, details of any planned                           |          |
| 43 |                           | restriction (eg, blocking) should be provided in a                     |          |
| 44 |                           | separate document that is unavailable to those who                     |          |
| 45 |                           | enrol participants or assign interventions                             |          |
| 46 |                           |                                                                        |          |
| 47 |                           |                                                                        |          |
| 48 |                           |                                                                        |          |
| 49 |                           |                                                                        |          |
| 50 |                           |                                                                        |          |
| 51 |                           |                                                                        |          |
| 52 |                           |                                                                        |          |
| 53 |                           |                                                                        |          |
| 54 |                           |                                                                        |          |
| 55 | Allocation                | <a href="#">#16b</a> Mechanism of implementing the allocation          | 12       |
| 56 |                           | sequence (eg, central telephone; sequentially                          |          |
| 57 | concealment               |                                                                        |          |
| 58 |                           |                                                                        |          |
| 59 |                           |                                                                        |          |
| 60 |                           |                                                                        |          |

|    |                        |                      |                                                        |                    |
|----|------------------------|----------------------|--------------------------------------------------------|--------------------|
| 1  | mechanism              |                      | numbered, opaque, sealed envelopes), describing        |                    |
| 2  |                        |                      |                                                        |                    |
| 3  |                        |                      | any steps to conceal the sequence until                |                    |
| 4  |                        |                      |                                                        |                    |
| 5  |                        |                      | interventions are assigned                             |                    |
| 6  |                        |                      |                                                        |                    |
| 7  |                        |                      |                                                        |                    |
| 8  | Allocation:            | <a href="#">#16c</a> | Who will generate the allocation sequence, who will    | 12                 |
| 9  |                        |                      |                                                        |                    |
| 10 | implementation         |                      | enrol participants, and who will assign participants   |                    |
| 11 |                        |                      |                                                        |                    |
| 12 |                        |                      | to interventions                                       |                    |
| 13 |                        |                      |                                                        |                    |
| 14 |                        |                      |                                                        |                    |
| 15 | Blinding (masking)     | <a href="#">#17a</a> | Who will be blinded after assignment to                | 23                 |
| 16 |                        |                      |                                                        |                    |
| 17 |                        |                      | interventions (eg, trial participants, care providers, |                    |
| 18 |                        |                      |                                                        |                    |
| 19 |                        |                      | outcome assessors, data analysts), and how             |                    |
| 20 |                        |                      |                                                        |                    |
| 21 |                        |                      |                                                        |                    |
| 22 |                        |                      |                                                        |                    |
| 23 | Blinding (masking):    | <a href="#">#17b</a> | If blinded, circumstances under which unblinding is    | n/a                |
| 24 |                        |                      |                                                        |                    |
| 25 | emergency              |                      | permissible, and procedure for revealing a             |                    |
| 26 |                        |                      |                                                        |                    |
| 27 | unblinding             |                      | participant's allocated intervention during the trial  |                    |
| 28 |                        |                      |                                                        |                    |
| 29 |                        |                      |                                                        |                    |
| 30 |                        |                      |                                                        |                    |
| 31 | <b>Methods: Data</b>   |                      |                                                        |                    |
| 32 |                        |                      |                                                        |                    |
| 33 | <b>collection,</b>     |                      |                                                        |                    |
| 34 |                        |                      |                                                        |                    |
| 35 | <b>management, and</b> |                      |                                                        |                    |
| 36 |                        |                      |                                                        |                    |
| 37 | <b>analysis</b>        |                      |                                                        |                    |
| 38 |                        |                      |                                                        |                    |
| 39 |                        |                      |                                                        |                    |
| 40 |                        |                      |                                                        |                    |
| 41 | Data collection plan   | <a href="#">#18a</a> | Plans for assessment and collection of outcome,        | Supplementary      |
| 42 |                        |                      |                                                        |                    |
| 43 |                        |                      | baseline, and other trial data, including any related  | file 1, 14,15, 17- |
| 44 |                        |                      |                                                        |                    |
| 45 |                        |                      | processes to promote data quality (eg, duplicate       | 19                 |
| 46 |                        |                      |                                                        |                    |
| 47 |                        |                      | measurements, training of assessors) and a             |                    |
| 48 |                        |                      |                                                        |                    |
| 49 |                        |                      | description of study instruments (eg,                  |                    |
| 50 |                        |                      |                                                        |                    |
| 51 |                        |                      | questionnaires, laboratory tests) along with their     |                    |
| 52 |                        |                      |                                                        |                    |
| 53 |                        |                      | reliability and validity, if known. Reference to where |                    |
| 54 |                        |                      |                                                        |                    |
| 55 |                        |                      | data collection forms can be found, if not in the      |                    |
| 56 |                        |                      |                                                        |                    |
| 57 |                        |                      |                                                        |                    |
| 58 |                        |                      |                                                        |                    |
| 59 |                        |                      |                                                        |                    |
| 60 |                        |                      |                                                        |                    |

|    |                            |                                                                             |        |
|----|----------------------------|-----------------------------------------------------------------------------|--------|
| 1  |                            | protocol                                                                    |        |
| 2  |                            |                                                                             |        |
| 3  |                            |                                                                             |        |
| 4  | Data collection plan:      | <a href="#">#18b</a> Plans to promote participant retention and complete    | 11     |
| 5  |                            |                                                                             |        |
| 6  | retention                  | follow-up, including list of any outcome data to be                         |        |
| 7  |                            |                                                                             |        |
| 8  |                            | collected for participants who discontinue or deviate                       |        |
| 9  |                            |                                                                             |        |
| 10 |                            | from intervention protocols                                                 |        |
| 11 |                            |                                                                             |        |
| 12 |                            |                                                                             |        |
| 13 | Data management            | <a href="#">#19</a> Plans for data entry, coding, security, and storage,    | 11, 21 |
| 14 |                            |                                                                             |        |
| 15 |                            | including any related processes to promote data                             |        |
| 16 |                            |                                                                             |        |
| 17 |                            | quality (eg, double data entry; range checks for data                       |        |
| 18 |                            |                                                                             |        |
| 19 |                            | values). Reference to where details of data                                 |        |
| 20 |                            |                                                                             |        |
| 21 |                            | management procedures can be found, if not in the                           |        |
| 22 |                            |                                                                             |        |
| 23 |                            | protocol                                                                    |        |
| 24 |                            |                                                                             |        |
| 25 |                            |                                                                             |        |
| 26 |                            |                                                                             |        |
| 27 |                            |                                                                             |        |
| 28 | Statistics: outcomes       | <a href="#">#20a</a> Statistical methods for analysing primary and          | 16, 20 |
| 29 |                            |                                                                             |        |
| 30 |                            | secondary outcomes. Reference to where other                                |        |
| 31 |                            |                                                                             |        |
| 32 |                            | details of the statistical analysis plan can be found,                      |        |
| 33 |                            |                                                                             |        |
| 34 |                            | if not in the protocol                                                      |        |
| 35 |                            |                                                                             |        |
| 36 |                            |                                                                             |        |
| 37 |                            |                                                                             |        |
| 38 | Statistics: additional     | <a href="#">#20b</a> Methods for any additional analyses (eg, subgroup      | 17     |
| 39 |                            |                                                                             |        |
| 40 | analyses                   | and adjusted analyses)                                                      |        |
| 41 |                            |                                                                             |        |
| 42 |                            |                                                                             |        |
| 43 | Statistics: analysis       | <a href="#">#20c</a> Definition of analysis population relating to protocol | 17     |
| 44 |                            |                                                                             |        |
| 45 | population and             | non-adherence (eg, as randomised analysis), and                             |        |
| 46 |                            |                                                                             |        |
| 47 | missing data               | any statistical methods to handle missing data (eg,                         |        |
| 48 |                            |                                                                             |        |
| 49 |                            | multiple imputation)                                                        |        |
| 50 |                            |                                                                             |        |
| 51 |                            |                                                                             |        |
| 52 |                            |                                                                             |        |
| 53 | <b>Methods: Monitoring</b> |                                                                             |        |
| 54 |                            |                                                                             |        |
| 55 |                            |                                                                             |        |
| 56 | Data monitoring:           | <a href="#">#21a</a> Composition of data monitoring committee (DMC);        | n/a    |
| 57 |                            |                                                                             |        |
| 58 |                            |                                                                             |        |
| 59 |                            |                                                                             |        |
| 60 |                            |                                                                             |        |

|    |                      |                                                                       |       |
|----|----------------------|-----------------------------------------------------------------------|-------|
| 1  | formal committee     | summary of its role and reporting structure;                          |       |
| 2  |                      |                                                                       |       |
| 3  |                      | statement of whether it is independent from the                       |       |
| 4  |                      |                                                                       |       |
| 5  |                      | sponsor and competing interests; and reference to                     |       |
| 6  |                      |                                                                       |       |
| 7  |                      | where further details about its charter can be found,                 |       |
| 8  |                      |                                                                       |       |
| 9  |                      | if not in the protocol. Alternatively, an explanation of              |       |
| 10 |                      |                                                                       |       |
| 11 |                      | why a DMC is not needed                                               |       |
| 12 |                      |                                                                       |       |
| 13 |                      |                                                                       |       |
| 14 |                      |                                                                       |       |
| 15 | Data monitoring:     | <a href="#">#21b</a> Description of any interim analyses and stopping | n/a   |
| 16 |                      |                                                                       |       |
| 17 | interim analysis     | guidelines, including who will have access to these                   |       |
| 18 |                      |                                                                       |       |
| 19 |                      | interim results and make the final decision to                        |       |
| 20 |                      |                                                                       |       |
| 21 |                      | terminate the trial                                                   |       |
| 22 |                      |                                                                       |       |
| 23 |                      |                                                                       |       |
| 24 |                      |                                                                       |       |
| 25 | Harms                | <a href="#">#22</a> Plans for collecting, assessing, reporting, and   | 24,15 |
| 26 |                      |                                                                       |       |
| 27 |                      | managing solicited and spontaneously reported                         |       |
| 28 |                      |                                                                       |       |
| 29 |                      | adverse events and other unintended effects of trial                  |       |
| 30 |                      |                                                                       |       |
| 31 |                      | interventions or trial conduct                                        |       |
| 32 |                      |                                                                       |       |
| 33 |                      |                                                                       |       |
| 34 |                      |                                                                       |       |
| 35 | Auditing             | <a href="#">#23</a> Frequency and procedures for auditing trial       | n/a   |
| 36 |                      |                                                                       |       |
| 37 |                      | conduct, if any, and whether the process will be                      |       |
| 38 |                      |                                                                       |       |
| 39 |                      | independent from investigators and the sponsor                        |       |
| 40 |                      |                                                                       |       |
| 41 |                      |                                                                       |       |
| 42 | <b>Ethics and</b>    |                                                                       |       |
| 43 |                      |                                                                       |       |
| 44 | <b>dissemination</b> |                                                                       |       |
| 45 |                      |                                                                       |       |
| 46 |                      |                                                                       |       |
| 47 |                      |                                                                       |       |
| 48 | Research ethics      | <a href="#">#24</a> Plans for seeking research ethics committee /     | 3, 24 |
| 49 |                      |                                                                       |       |
| 50 | approval             | institutional review board (REC / IRB) approval                       |       |
| 51 |                      |                                                                       |       |
| 52 |                      |                                                                       |       |
| 53 | Protocol             | <a href="#">#25</a> Plans for communicating important protocol        |       |
| 54 |                      |                                                                       |       |
| 55 | amendments           | modifications (eg, changes to eligibility criteria,                   |       |
| 56 |                      |                                                                       |       |
| 57 |                      | outcomes, analyses) to relevant parties (eg,                          |       |
| 58 |                      |                                                                       |       |
| 59 |                      |                                                                       |       |
| 60 |                      |                                                                       |       |

|    |                       |                                                                            |            |
|----|-----------------------|----------------------------------------------------------------------------|------------|
| 1  |                       | investigators, REC / IRBs, trial participants, trial                       |            |
| 2  |                       | registries, journals, regulators)                                          |            |
| 3  |                       |                                                                            |            |
| 4  |                       |                                                                            |            |
| 5  |                       |                                                                            |            |
| 6  | Consent or assent     | <a href="#">#26a</a> Who will obtain informed consent or assent from       | 13, 14, 24 |
| 7  |                       |                                                                            |            |
| 8  |                       | potential trial participants or authorised surrogates,                     |            |
| 9  |                       |                                                                            |            |
| 10 |                       | and how (see Item 32)                                                      |            |
| 11 |                       |                                                                            |            |
| 12 |                       |                                                                            |            |
| 13 | Consent or assent:    | <a href="#">#26b</a> Additional consent provisions for collection and use  | n/a        |
| 14 |                       |                                                                            |            |
| 15 | ancillary studies     | of participant data and biological specimens in                            |            |
| 16 |                       | ancillary studies, if applicable                                           |            |
| 17 |                       |                                                                            |            |
| 18 |                       |                                                                            |            |
| 19 |                       |                                                                            |            |
| 20 |                       |                                                                            |            |
| 21 | Confidentiality       | <a href="#">#27</a> How personal information about potential and           | 28         |
| 22 |                       |                                                                            |            |
| 23 |                       | enrolled participants will be collected, shared, and                       |            |
| 24 |                       |                                                                            |            |
| 25 |                       | maintained in order to protect confidentiality before,                     |            |
| 26 |                       |                                                                            |            |
| 27 |                       | during, and after the trial                                                |            |
| 28 |                       |                                                                            |            |
| 29 |                       |                                                                            |            |
| 30 |                       |                                                                            |            |
| 31 | Declaration of        | <a href="#">#28</a> Financial and other competing interests for principal  | 28         |
| 32 |                       |                                                                            |            |
| 33 | interests             | investigators for the overall trial and each study site                    |            |
| 34 |                       |                                                                            |            |
| 35 |                       |                                                                            |            |
| 36 | Data access           | <a href="#">#29</a> Statement of who will have access to the final trial   | 28         |
| 37 |                       |                                                                            |            |
| 38 |                       | dataset, and disclosure of contractual agreements                          |            |
| 39 |                       |                                                                            |            |
| 40 |                       | that limit such access for investigators                                   |            |
| 41 |                       |                                                                            |            |
| 42 |                       |                                                                            |            |
| 43 |                       |                                                                            |            |
| 44 | Ancillary and post    | <a href="#">#30</a> Provisions, if any, for ancillary and post-trial care, | n/a        |
| 45 |                       |                                                                            |            |
| 46 | trial care            | and for compensation to those who suffer harm                              |            |
| 47 |                       |                                                                            |            |
| 48 |                       | from trial participation                                                   |            |
| 49 |                       |                                                                            |            |
| 50 |                       |                                                                            |            |
| 51 | Dissemination         | <a href="#">#31a</a> Plans for investigators and sponsor to communicate    | 24         |
| 52 |                       |                                                                            |            |
| 53 | policy: trial results | trial results to participants, healthcare professionals,                   |            |
| 54 |                       |                                                                            |            |
| 55 |                       | the public, and other relevant groups (eg, via                             |            |
| 56 |                       |                                                                            |            |
| 57 |                       |                                                                            |            |
| 58 |                       |                                                                            |            |
| 59 |                       |                                                                            |            |
| 60 |                       |                                                                            |            |

publication, reporting in results databases, or other  
 data sharing arrangements), including any  
 publication restrictions

Dissemination [#31b](#) Authorship eligibility guidelines and any intended n/a  
 policy: authorship use of professional writers

Dissemination [#31c](#) Plans, if any, for granting public access to the full 28  
 policy: reproducible protocol, participant-level dataset, and statistical  
 research code

## Appendices

Informed consent [#32](#) Model consent form and other related n/a  
 materials documentation given to participants and authorised  
 surrogates

Biological [#33](#) Plans for collection, laboratory evaluation, and n/a  
 specimens storage of biological specimens for genetic or  
 molecular analysis in the current trial and for future  
 use in ancillary studies, if applicable

None The SPIRIT checklist is distributed under the terms of the Creative Commons Attribution  
 License CC-BY-ND 3.0. This checklist can be completed online using <https://www.goodreports.org/>, a  
 tool made by the [EQUATOR Network](#) in collaboration with [Penelope.ai](#)

# BMJ Open

## Improving the patient-centred care of children with life-altering skin conditions using feedback from electronic patient-reported outcome measures: Protocol for a hybrid effectiveness-implementation study (PEDS-ePROM)

|                                 |                                                                                                                                                                                                                                                                                                                                                                                                                                                                                                                                                                                                                                                                                                                                                                                                                                                                                                                              |
|---------------------------------|------------------------------------------------------------------------------------------------------------------------------------------------------------------------------------------------------------------------------------------------------------------------------------------------------------------------------------------------------------------------------------------------------------------------------------------------------------------------------------------------------------------------------------------------------------------------------------------------------------------------------------------------------------------------------------------------------------------------------------------------------------------------------------------------------------------------------------------------------------------------------------------------------------------------------|
| Journal:                        | <i>BMJ Open</i>                                                                                                                                                                                                                                                                                                                                                                                                                                                                                                                                                                                                                                                                                                                                                                                                                                                                                                              |
| Manuscript ID                   | bmjopen-2020-041861.R2                                                                                                                                                                                                                                                                                                                                                                                                                                                                                                                                                                                                                                                                                                                                                                                                                                                                                                       |
| Article Type:                   | Protocol                                                                                                                                                                                                                                                                                                                                                                                                                                                                                                                                                                                                                                                                                                                                                                                                                                                                                                                     |
| Date Submitted by the Author:   | 24-Dec-2020                                                                                                                                                                                                                                                                                                                                                                                                                                                                                                                                                                                                                                                                                                                                                                                                                                                                                                                  |
| Complete List of Authors:       | <p>Tyack, Zephania; The University of Queensland, Centre for Children's Burns and Trauma Research, Child Health Research Centre; Queensland Children's Hospital</p> <p>Simons, Megan; The University of Queensland, Centre for Children's Burns and Trauma Research, Child Health Research Centre; Queensland Children's Hospital, Department of Occupational Therapy</p> <p>McPhail, Steven; Queensland University of Technology, School of Public Health and Social Work and Institute of Health and Biomedical Innovation</p> <p>Harvey, Gillian; The University of Adelaide, Adelaide Nursing School</p> <p>Zappala, Tania; Queensland Children's Hospital</p> <p>Ware, Robert; Griffith University - GC Campus, Menzies Health Institute Queensland</p> <p>Kimble, Roy; The University of Queensland, Centre for Children's Burns and Trauma Research, Child Health Research Centre; Queensland Children's Hospital</p> |
| <b>Primary Subject Heading</b>: | Paediatrics                                                                                                                                                                                                                                                                                                                                                                                                                                                                                                                                                                                                                                                                                                                                                                                                                                                                                                                  |
| Secondary Subject Heading:      | Patient-centred medicine, Rehabilitation medicine, Dermatology, Health services research                                                                                                                                                                                                                                                                                                                                                                                                                                                                                                                                                                                                                                                                                                                                                                                                                                     |
| Keywords:                       | PAEDIATRICS, Change management < HEALTH SERVICES ADMINISTRATION & MANAGEMENT, Paediatric dermatology < DERMATOLOGY, Telemedicine < BIOTECHNOLOGY & BIOINFORMATICS, Organisation of health services < HEALTH SERVICES ADMINISTRATION & MANAGEMENT                                                                                                                                                                                                                                                                                                                                                                                                                                                                                                                                                                                                                                                                             |
|                                 |                                                                                                                                                                                                                                                                                                                                                                                                                                                                                                                                                                                                                                                                                                                                                                                                                                                                                                                              |

SCHOLARONE™  
Manuscripts





I, the Submitting Author has the right to grant and does grant on behalf of all authors of the Work (as defined in the below author licence), an exclusive licence and/or a non-exclusive licence for contributions from authors who are: i) UK Crown employees; ii) where BMJ has agreed a CC-BY licence shall apply, and/or iii) in accordance with the terms applicable for US Federal Government officers or employees acting as part of their official duties; on a worldwide, perpetual, irrevocable, royalty-free basis to BMJ Publishing Group Ltd ("BMJ") its licensees and where the relevant Journal is co-owned by BMJ to the co-owners of the Journal, to publish the Work in this journal and any other BMJ products and to exploit all rights, as set out in our [licence](#).

The Submitting Author accepts and understands that any supply made under these terms is made by BMJ to the Submitting Author unless you are acting as an employee on behalf of your employer or a postgraduate student of an affiliated institution which is paying any applicable article publishing charge ("APC") for Open Access articles. Where the Submitting Author wishes to make the Work available on an Open Access basis (and intends to pay the relevant APC), the terms of reuse of such Open Access shall be governed by a Creative Commons licence – details of these licences and which [Creative Commons](#) licence will apply to this Work are set out in our licence referred to above.

Other than as permitted in any relevant BMJ Author's Self Archiving Policies, I confirm this Work has not been accepted for publication elsewhere, is not being considered for publication elsewhere and does not duplicate material already published. I confirm all authors consent to publication of this Work and authorise the granting of this licence.

1  
2  
3 **TITLE: Improving the patient-centred care of children with life-altering skin**  
4 **conditions using feedback from electronic patient-reported outcome**  
5 **measures: Protocol for a hybrid effectiveness-implementation study (PEDS-**  
6 **ePROM)**  
7  
8  
9

10  
11 Dr Zephania Tyack <sup>1,2,5\*</sup>, Associate Professor Megan Simons <sup>1,2</sup>, Professor Steven M  
12 McPhail <sup>5</sup>, Professor Gillian Harvey <sup>3,6</sup> Dr Tania Zappala <sup>2</sup>, Professor Robert S Ware  
13 <sup>4</sup>, Professor Roy Kimble <sup>1,2,6</sup>  
14  
15  
16  
17

18  
19 <sup>1</sup>The University of Queensland, Centre for Children's Burns and Trauma Research,  
20 Child Health Research Centre, St Lucia, QLD, Australia 4072.  
21

22 <sup>2</sup>Queensland Children's Hospital, 501 Stanley St, South Brisbane, QLD, Australia  
23 4101.  
24

25 <sup>3</sup>Adelaide Nursing School, Adelaide Health & Medical Sciences Building, Level 6,  
26 Corner North Terrace & George Street, The University of Adelaide, South Australia  
27 5005 Australia.  
28  
29

30 <sup>4</sup>Menzies Health Institute Queensland, Griffith University, Southport, QLD, Australia  
31 4222.  
32

33 <sup>5</sup>School of Public Health and Social Work and Institute of Health and Biomedical  
34 Innovation, Queensland University of Technology, 149 Victoria Park Rd, Kelvin  
35 Grove, QLD, Australia 4059.  
36  
37

38 <sup>6</sup>Centre for Children's Burns and Trauma Research, Queensland University of  
39 Technology, 149 Victoria Park Rd, Kelvin Grove, QLD, Australia 4059.  
40  
41  
42  
43

44 \*Corresponding author

45 Dr Zephania Tyack

46 Children's Health Research Centre,

47 62 Graham St, South Brisbane, QLD, Australia 4101.

48 Email: [z.tyack@uq.edu.au](mailto:z.tyack@uq.edu.au)  
49  
50  
51  
52  
53

54 Word count 5242  
55  
56  
57  
58  
59  
60

1  
2  
3 **TITLE: Improving the patient-centred care of children with life-altering skin**  
4 **conditions using an electronic patient-reported feedback intervention (PEDS-**  
5 **ePROM): Protocol for a type 2 hybrid effectiveness-implementation study**  
6  
7  
8  
9  
10

11  
12 **ABSTRACT**  
13

14 **Introduction**  
15

16 Using patient-reported outcome measures (PROMs) with children have been  
17 described as 'giving a voice to the child'. Few studies have examined the routine use  
18 of these measures as potentially therapeutic interventions. This study aims to  
19 investigate: (1) the *effectiveness* of feedback using graphical displays of information  
20 from electronic PROMs (ePROMS) that target health-related quality of life, to  
21 improve health outcomes, referrals, and treatment satisfaction; and (2) the  
22 *implementation* of ePROMs and graphical displays by assessing acceptability,  
23 sustainability, cost, fidelity and context of the intervention and study processes.  
24  
25  
26  
27  
28  
29  
30  
31  
32  
33  
34

35 **Methods and analysis**  
36

37 A hybrid II effectiveness-implementation study will be conducted from February 2020  
38 with children with life-altering skin conditions attending two outpatient clinics at a  
39 specialist paediatric children's hospital. A pragmatic randomised controlled trial and  
40 mixed methods process evaluation will be completed. Randomisation will occur at  
41 the child participant level. Children or parent proxies completing baseline ePROMs  
42 will be randomised to: (1) completion of ePROMs plus graphical displays of ePROM  
43 results to treating clinicians in consultations, versus (2) completion of ePROMs  
44 without graphical display of ePROM results. The primary outcome of the  
45 effectiveness trial will be overall health-related quality of life of children. Secondary  
46 outcomes will include other health-related quality of life outcomes (e.g., child  
47  
48  
49  
50  
51  
52  
53  
54  
55  
56  
57  
58  
59  
60

1  
2  
3 psychosocial and physical health, parent psychosocial health), referrals, and  
4  
5 treatment satisfaction. Trial data will be primarily analysed using linear mixed-effects  
6  
7 models; and implementation data using inductive thematic analysis of interviews,  
8  
9 meeting minutes, observational field notes and study communication mapped to the  
10  
11 Consolidated Framework for Implementation Research.  
12  
13  
14  
15  
16

### 17 **Ethics and dissemination**

18  
19 Ethical approval was obtained from Children's Health Queensland Human Research  
20  
21 Ethics Committee (HREC/2019/QCHQ/56290), The University of Queensland  
22  
23 (2019002233), and Queensland University of Technology (1900000847).  
24  
25

26 Dissemination will occur through stakeholder groups, scientific meetings and peer-  
27  
28 reviewed publications.  
29  
30  
31  
32

### 33 **Trial registration**

34  
35 ACTRN12620000174987  
36  
37

### 38 **Keywords**

39  
40  
41 Patient-reported outcome measures, quality of life, paediatrics, patient-centred care,  
42  
43 implementation  
44  
45  
46  
47  
48  
49  
50  
51  
52  
53  
54  
55  
56  
57  
58  
59  
60

## ARTICLE SUMMARY

### Strengths and limitations of this study

- New evidence of the effectiveness and implementation of electronic patient-reported outcome measures (ePROMs) in the routine clinical care of children with skin conditions and their parents will be generated which has received limited attention.
- Stakeholders representing multiple perspectives (children, parents, health professionals) were involved in the development of the intervention and process evaluation.
- Lack of ability to mask participants to the outcomes and contamination of the control group are potential biases, although child and parent participants were masked to the hypotheses.

## INTRODUCTION

The routine use of patient-reported outcome measures (PROMs), or proxy-report measures, as part of routine clinical care has been identified as a means of driving change in healthcare systems, to ensure the unique voice of the patient is heard [1,2]. Potential benefits are improvements in shared decision-making, communication with health professionals and adherence to recommended treatments [3]. PROMs are defined as questionnaires completed by a patient with a health condition about their own health and treatment.

A recent systematic review identified that the effectiveness of PROM interventions for people with health conditions compared to usual care has been positive in adequately powered studies [4]. Few trials have been conducted in children. Only 2 of 22 included randomised controlled trials were conducted in children, one focussed on children with diabetes and one on children with cancer [5,6]. Two more recent paediatric cluster randomised controlled trials investigated PROMs used with children with severe mental health conditions attending child and adolescent psychiatric services [7,8]. Only one of the four paediatric trials identified positive effects of the PROM intervention. The positive effects were for psychosocial health-related quality of life but not physical health-related quality of life in children with diabetes [5].

The implementation of PROMs in routine paediatric care has also recently been investigated in a systematic review, with increased identification and discussion around health-related quality of life reported, particularly in psychosocial and emotional domains, but with mixed results regarding the impact on the quality of care

1  
2  
3 [9]. Quality of care outcomes examined were satisfaction with treatment, referral  
4 rate, and consultation length.  
5  
6  
7  
8  
9

10 Implementation outcomes can be examined using an implementation science  
11 framework such as The Consolidated Framework for Implementation Research. This  
12 framework has been identified as a 'good fit' for examining the implementation of  
13 PROMs in health service organisations in a recent systematic review of reviews that  
14 can assist to determine factors that influence implementation [10], and understand  
15 how the intervention works (i.e., the process by which behaviour change occurs)  
16 [11]. Multi-level influences on implementation can be examined through a focus on  
17 individual characteristics of patients, families and clinicians (e.g. knowledge & beliefs  
18 about the intervention), as well as organisational and process factors (e.g.,  
19 engagement) [12].  
20  
21  
22  
23  
24  
25  
26  
27  
28  
29  
30  
31  
32  
33  
34

35 This paper will report the protocol for a randomised controlled trial and  
36 implementation study to test the effectiveness and implementation outcomes of a  
37 PROM feedback intervention targeting health-related quality of life, in children with  
38 the life-altering skin conditions of burn scars and infantile haemangiomas (termed  
39 the PEDS-ePROM study). The intervention involves the delivery of graphical  
40 displays of information from electronic PROMs (ePROMs) in routine consultations to  
41 encourage communication about the areas displayed and support clinical decision-  
42 making. A comparison intervention involves the completion of ePROMs alone  
43 without any graphical display of information. The need for interventions to improve  
44 the health-related quality of life of these children is highlighted by the lower health-  
45 related quality of life of children with burn scars across multiple domains even years  
46  
47  
48  
49  
50  
51  
52  
53  
54  
55  
56  
57  
58  
59  
60

1  
2  
3 after the actual injury compared to children with cancer [13]. At the time of  
4  
5 publication, the intervention had been designed and the randomised controlled trial  
6  
7 and implementation testing was underway with no findings yet available.  
8  
9

## 10 11 12 **Aims and objectives**

13  
14 The primary effectiveness aim is to determine the short-term effectiveness of  
15  
16 implementing ePROMs with graphical displays of result summaries, on overall  
17  
18 health-related quality of life of children with life-altering skin conditions. Secondary  
19  
20 aims will be to examine the effectiveness of the intervention for other health-related  
21  
22 quality of life outcomes of children and parents, the number and type of referrals to  
23  
24 health professionals and treatment satisfaction.  
25  
26

### 27 28 *Hypotheses (effectiveness component)*

- 29  
30  
31  
32 1. The ePROM plus graphical display intervention will have a greater effect on overall  
33  
34 health-related quality of life than the ePROM alone intervention, with a consistent  
35  
36 direction and similar strength of effect across the clinics and conditions, supporting  
37  
38 comparative effectiveness of the intervention.  
39  
40 2. The ePROM plus graphical display intervention will increase the number of  
41  
42 psychosocial referrals to health professionals and increase parent proxy-reported  
43  
44 satisfaction with treatment compared to the ePROM alone intervention.  
45  
46

### 47 48 **Implementation outcomes**

49  
50 The primary aim is to determine the short-term acceptability and sustainability of  
51  
52 implementing the interventions. The secondary aim is to determine the cost, fidelity  
53  
54 and contextual factors related to implementation.  
55  
56

## 57 58 **METHODS AND ANALYSIS**

### 59 60 **Development of the study design and intervention**



1  
2  
3 The development of the PEDS-ePROM study and intervention was conducted from  
4 May 2019 to January 2020. We initiated preliminary discussion with clinicians in  
5  
6 clinical areas to identify which measures were already being used routinely in  
7  
8 practice. Systematic reviews and paediatric literature regarding the use of PROMs  
9  
10 were also reviewed. Interview guides were developed to identify health outcomes  
11  
12 that are meaningful and of high priority to children, their families and health  
13  
14 professionals in the PROM intervention [14]. The nine core questions from the  
15  
16 International Society of Quality of Life (ISOQOL) user guide and the companion  
17  
18 guide areas were addressed in the interviews [15]. This development strategy using  
19  
20 existing research and interviews with parent proxies and children has been identified  
21  
22 as important to improve the engagement of children and young people such that  
23  
24 fewer items are missed and responses accurately reflect their experiences and  
25  
26 cognitive ability [16].  
27  
28  
29  
30  
31  
32  
33  
34

35 Interviews were conducted with children with life-altering skin conditions, their  
36  
37 parents and treating health professionals in two phases as part of the pre-  
38  
39 implementation planning, with interview questions mapped to the Consolidated  
40  
41 Framework for Implementation Research. In the first phase the most appropriate  
42  
43 outcomes and PROMs were identified. In the second phase the content validity of  
44  
45 chosen PROMs and process evaluation were confirmed. Potential barriers and  
46  
47 benefits to implementation were identified in both phases. For children with burn  
48  
49 scars and their families, measures of health-related quality of life specific to scarring  
50  
51 that included symptoms and treatment burden were prioritised based on conceptual  
52  
53 work from the research team that identified these aspects as central components of  
54  
55 health-related quality of life for this group [17]. The design of the randomised  
56  
57  
58  
59  
60

1  
2  
3 controlled trial was based on systematic review findings that identified greater  
4 benefits when PROM results were provided to clinicians compared to when results  
5 were not provided to clinicians [4]. Measures of the child's health-related quality of  
6 life were completed using parent-proxy and child self-report. The age cut-off for child  
7 self-report of 8 years or older was chosen for several reasons: this cut-off was being  
8 used in clinical practice in the burn scar clinics in the study setting; the burn scar-  
9 specific measures chosen were developed based on this cut-off; and the experience  
10 of the clinical and research team had identified that younger children aged 5 to 8  
11 years often had difficulty comprehending the concepts captured in health-related  
12 quality of life measures [18]. The difficulty children aged 5 to 8 years may have  
13 completing patient-reported outcome measures of health-related quality of life aligns  
14 with the findings of other paediatric researchers who identified the strongest  
15 evidence was for the broad age-range of 6-8 years as the youngest age children can  
16 meaningfully report on a patient-reported outcome [19].  
17  
18  
19  
20  
21  
22  
23  
24  
25  
26  
27  
28  
29  
30  
31  
32  
33  
34  
35  
36  
37

### **ePROM and graphical display intervention**

38  
39 The Pediatric Quality of Life Inventory infant and generic scales [20,21] measuring  
40 health-related quality of life were included as generic measures that were the same  
41 across the clinics and conditions. Condition-specific health-related quality of life  
42 measures were also included as these measures have been identified as being more  
43 responsive to change than generic measures [22]. Condition-specific health-related  
44 quality of life measures selected were the Brisbane Burn Scar Impact Profile [17,18],  
45 The CARE parent scale [23], Hemangioma Family Burden questionnaire [24] and  
46 Infantile Hemangioma Quality of Life Scale [25]. Selected measures targeted  
47 children and their parents and a single item targeted siblings. An open-ended option  
48  
49  
50  
51  
52  
53  
54  
55  
56  
57  
58  
59  
60

1  
2  
3 was also available for child and parent participants to report their priorities for care.  
4  
5 Only PROMs meeting the criteria of content validity supported by involvement of the  
6  
7 target group in development were included with the exception of the treatment  
8  
9 satisfaction item. Graphical displays of result summaries from the Pediatric Quality of  
10  
11 Life Inventory and condition-specific measures of health-related quality of life  
12  
13 measure will be presented in consultations for children with skin conditions and their  
14  
15 parents to treating clinicians. The components of the intervention are reported in  
16  
17  
18  
19 Table 1.  
20  
21  
22  
23  
24  
25  
26  
27  
28  
29  
30  
31  
32  
33  
34  
35  
36  
37  
38  
39  
40  
41  
42  
43  
44  
45  
46  
47  
48  
49  
50  
51  
52  
53  
54  
55  
56  
57  
58  
59  
60

For peer review only

Table 1. Description of the ePROM plus graphical display and ePROM alone interventions\*

| Clinic           | Mode of administration                                                                                                                                                                     | ePROM + graphical display (intervention group)            |                                                                                                                                                                                      |                                                                                            | ePROM alone (comparison group)                                                                               |                                                                                                                                                              |                           | Intervention period |
|------------------|--------------------------------------------------------------------------------------------------------------------------------------------------------------------------------------------|-----------------------------------------------------------|--------------------------------------------------------------------------------------------------------------------------------------------------------------------------------------|--------------------------------------------------------------------------------------------|--------------------------------------------------------------------------------------------------------------|--------------------------------------------------------------------------------------------------------------------------------------------------------------|---------------------------|---------------------|
|                  |                                                                                                                                                                                            | Content                                                   | Duration                                                                                                                                                                             | Frequency                                                                                  | Content                                                                                                      | Duration                                                                                                                                                     | Frequency                 |                     |
| Burn scar clinic | Administered remotely using email or by a research occupational therapist in the clinic setting. PROM data collected electronically on a device at home or on an Apple iPad in the clinic. | PEDS-QL generic and infant scales<br>BBSIP<br>CARE scales | Approx. 15 mins for child and parent participants to complete ePROMs prior consultations. Up to 15 mins to download, print and deliver ePROMs & graphical displays to consultations. | Delivered in consultations up to 1x/ mth. Based on usual care likely to be delivered 2-3x. | ePROMs delivered and completed as per intervention group. No graphical summaries provided in consultations‡. | Approximately 15 mins for child and parent participants to complete ePROMs prior to each consultation. Up to 5 minutes to download, print and deliver ePROM. | As per intervention group | Baseline - 6 mths † |

1  
2  
3  
4  
5  
6  
7  
8  
9  
10  
11  
12  
13  
14  
15  
16  
17  
18  
19  
20  
21  
22  
23  
24  
25  
26  
27  
28  
29  
30  
31  
32  
33  
34  
35  
36  
37  
38  
39  
40  
41  
42  
43  
44  
45  
46

|                 |                         |                                                                                                               |                                                                                                                                                                                   |                                                                              |                                                                                                              |                                                                                                                              |                           |                     |
|-----------------|-------------------------|---------------------------------------------------------------------------------------------------------------|-----------------------------------------------------------------------------------------------------------------------------------------------------------------------------------|------------------------------------------------------------------------------|--------------------------------------------------------------------------------------------------------------|------------------------------------------------------------------------------------------------------------------------------|---------------------------|---------------------|
| Vascular clinic | As per burn scar clinic | PEDS-QL infant scales Hemangioma Family Burden questionnaire Infantile Haemangioma Quality-of-Life Instrument | Approx. 10 mins for parent participants to complete ePROMs prior to each consultation. Up to 10 mins to download, print and deliver ePROMs & graphical displays to consultations. | Delivered in consultations up to 1x/mth. Based on usual care likely 1-2x **. | ePROMs delivered and completed as per intervention group. No graphical summaries provided in consultations‡. | Approximately 10 mins for child and parent participants to complete ePROMs prior to each consultation. No printing required. | As per intervention group | Baseline - 6 mths † |
|-----------------|-------------------------|---------------------------------------------------------------------------------------------------------------|-----------------------------------------------------------------------------------------------------------------------------------------------------------------------------------|------------------------------------------------------------------------------|--------------------------------------------------------------------------------------------------------------|------------------------------------------------------------------------------------------------------------------------------|---------------------------|---------------------|

\* Based on the Template for Intervention Description and Replication (TIDieR) guidelines [26]

† Post-baseline

‡ Graphical summaries provided to child and parent participants and entered into medical records at the end of the study

\*\* Children with ulcerated haemangiomas may receive intervention more frequently

PROM, patient-reported outcome measure; ePROMs, electronic patient-reported outcome measures; PEDS-QL, Pediatric Evaluation of Quality of Life Inventory; approx., approximately; mins, minutes; mth, months

### **Method for completing PROMs**

Electronically-delivered PROMs were identified as the best option for getting patients to complete the measures at home prior to consultations to reduce the burden of administration of measures and result summaries during busy clinics. The ePROMs will be administered via a weblink sent to parent participants in an email in the three days prior to their appointment. If the questionnaires are not completed via the weblink, child and parent participants will be offered a further opportunity to complete the questionnaires using an iPad prior to their consultation at the outpatient clinic while they are waiting for their consultation where possible. Parent proxy-report will continue throughout the study for any child who turns eight years of age after first completion using parent proxy-report. Phone calls will be used to remind parent participants to complete the ePROMs. The ePROMs and graphical display of result summaries will be generated using the online survey software program Qualtrics<sup>XM</sup> [27] and presented to treating health professionals immediately prior to appointments. Copies of the ePROMs and graphical displays of result summaries will be stored in medical records.

### **Context**

The setting will be two outpatient clinics at a major metropolitan quaternary-level children's hospital in Australia; a burns clinic and a vascular anomalies clinic. Parents (and their children with skin conditions if aged 8 years or older) will be consecutively approached and recruited, and the intervention delivered prior to and at these clinics. The catchment of the hospital includes inhabitants from rural, regional and metropolitan areas including those from surrounding islands. Recruitment commenced in January 2019. The first participant was randomised to receive the intervention in March 2020.

## Research design

A hybrid type 2 effectiveness-implementation design will be used which blends evaluating intervention effectiveness and understanding implementation of the intervention simultaneously [28]. Benefits of this design include reduced lag time for uptake of the results into routine clinical practice and understanding the barriers and benefits to implementation [28]. A pragmatic two-arm randomised controlled trial will be conducted using block randomisation in random blocks of 4, 6 or 8 stratified by diagnostic group (i.e., infantile haemangiomas, burn scars), with child participants as the unit of randomisation; and an embedded qualitative process evaluation involving interviews with clinicians, and child and parent participants. The randomisation sequence will be prepared by a statistician independent from the study and will be concealed using sequentially numbered, opaque, sealed envelopes with tamper proof tape prepared by a person independent from the study.

The randomised controlled trial arms will be: (1) ePROM completion plus graphical display of result summaries to clinicians (intervention group) versus; (2) ePROM completion alone without graphical display of result summaries to clinicians (comparison group).

Baseline PROM measurement will occur before randomisation. PROM measurement will occur prior to or at one or more hospital appointments over the following 6-months and follow-up measurement will occur at 3-months and 6-months post-baseline if these timepoints differ from data collection timepoints during consultations with health professionals. Child and parent participants will be masked to the

1  
2  
3 hypotheses. A Standard Protocol Items Recommendations for Interventional Trials  
4 (SPIRIT) flow diagram has been used to report the schedule for enrolment,  
5  
6 (SPIRIT) flow diagram has been used to report the schedule for enrolment,  
7  
8 interventions and evaluations for the effectiveness component of the study (Figure  
9  
10 1).

11  
12  
13  
14 The study design and evaluation plan have been informed by the Consolidated  
15  
16 Framework for Implementation Research. This framework covers the physical and  
17  
18 social environment, values, individual motivation and capacity factors which are  
19  
20 considered important for the intervention being tested and has been derived from 33  
21  
22 theories relating to implementation [29]. This protocol paper has been prepared  
23  
24 following the eHealth Consolidated Standards of Reporting Trials (CONSORT)  
25  
26 guidelines [30].  
27  
28  
29

### 30 31 32 **Participants**

33  
34 Participants for the effectiveness trial will be consecutively sampled. A previous study  
35  
36 by the author team using this sampling in the study setting with the same population  
37  
38 [31, 32] demonstrated representation of the burn scar study population [33].  
39  
40 Participants for the implementation study component will be purposively sampled with  
41  
42 representation of parents across both clinics, those who responded positively and  
43  
44 negatively to the intervention, and children across different age-groups or their parents  
45  
46 where possible.  
47  
48  
49

### 50 51 52 **Inclusion criteria**

53  
54 Children with burn scars and infantile haemangiomas, aged 0 to 16 years at the time  
55  
56 of recruitment, who require ongoing management in the hospital setting, and their  
57  
58 parents aged 18 years or older will be included. Ongoing management is defined as  
59  
60



1  
2  
3 children who require one or more ongoing hospital consultations with clinicians at the  
4 study setting beyond baseline in the 6-month post-baseline intervention period for the  
5 prevention or management of skin conditions as determined by treating clinicians at  
6 baseline. Treating clinicians will also be asked to determine children's ability to  
7 complete PROMs electronically based on their physical condition and knowledge of  
8 the family (i.e., to determine if bilateral hand burns would prevent sufficient movement  
9 of their hands to use an iPad).

### 20 Exclusion criteria

21  
22 Children and parents will not be eligible to participate if they are involved with child  
23 protection services and it is difficult to obtain consent, where circumstances interfere  
24 with the participant's ability to give informed consent (i.e., diminished understanding  
25 or comprehension), or where there is difficulty completing the PROMs due to  
26 difficulty speaking or understanding written English. Participants who have difficulty  
27 speaking or understanding written English will be excluded as it was difficult to  
28 anticipate in advance the languages that might be required for ePROMs due to the  
29 cultural diversity of patients seen in the setting; as multiple ePROMs were being  
30 administered (four with no or few translations available) with most not developed or  
31 tested using culturally diverse groups which is an important criteria for establishing  
32 cross-cultural validity [34,35]; as funding was not available for purchasing available  
33 translations of up to US\$500 per translation; and as the interventions were not  
34 developed with these people thus it was unclear whether the interventions would  
35 meet the needs of these potential participants.

### 54 Sample size estimate

55  
56  
57 The sample size was based on recruitment feasibility. A retrospective audit of child  
58 and parent participants of clinic attendees suggested at least 35 participants in each  
59  
60

1  
2  
3 clinic can be recruited in the intervention period. In terms of the effectiveness  
4  
5 randomised controlled trial, if outcome data is available for 70 participants overall,  
6  
7 then with 80% power we will be able to detect an effect size for the difference  
8  
9 between-arms of 0.68 standard deviation units or greater for overall health-related  
10  
11 quality of life at 6-months post-baseline ( $\alpha=0.05$ ). A between group difference of  
12  
13 0.68 is considered clinically meaningful at the individual level by expert clinicians, as  
14  
15 a medium to large effect is regarded as offsetting the burden of completion of  
16  
17 ePROMs to patients and families and supporting implementation routinely in clinics.  
18  
19 To account for twenty percent attrition expected at 6-month follow-up based on a  
20  
21 prior study with children and parents completing patient-reported outcome measures  
22  
23 in the burns clinic setting [31], recruitment will continue until at least 88 participants  
24  
25 have been randomised to groups. The sample size estimate was based on all  
26  
27 participants with data available including parent proxy and child report data. A recent  
28  
29 systematic review of health-related quality of life in children with burns identified that  
30  
31 parent-proxy and child self-ratings were generally comparable based on generic and  
32  
33 burn specific measures [36]. This findings is supported by an additional two trials  
34  
35 examining burn scar specific health-related quality of life in the burn scar clinic in this  
36  
37 study which were not included in the systematic review [31,32]. These trials identified  
38  
39 similar health-related quality of life scores using proxy and child report and for  
40  
41 children aged less than 8 years and older than 8 years.  
42  
43  
44  
45  
46  
47  
48  
49  
50

51 Interviews will be conducted with the following groups during implementation with  
52  
53 numbers of participants represented approximately equally for each clinic: children  
54  
55 with a skin condition, their parents and treating health professionals. Interviews will  
56  
57 continue until saturation (i.e. the point at which no further dimensions, nuances, or  
58  
59  
60

1  
2  
3 insights of issues are identified) [37] building on interview data generated pre-  
4  
5 implementation. A greater number of child interviews will be required than parent and  
6  
7 health professional interviews based on our previous experience of generally  
8  
9 obtaining shorter interviews of 15 to 20 minutes in children with burn scars than with  
10  
11 parents and health professionals.  
12  
13  
14  
15  
16

## 17 **Evaluation**

### 18 Effectiveness outcomes

19  
20 Study outcome measures will be self-completed by children aged 8 years or older  
21  
22 and proxy-completed by parents for younger children. The primary outcome  
23  
24 assessed will be change in the child's generic overall health across both clinics  
25  
26 measured using The Pediatric Quality of Life Inventory (PedsQL™ 4.0 Generic Core  
27  
28 and Infant Scales proxy-report total score) [20,21]. Secondary outcomes will be: a)  
29  
30 change in the child's psychosocial and physical health across both clinics measured  
31  
32 using The Pediatric Quality of Life Inventory; respective subscales; c) change in the  
33  
34 child's generic health across both clinics measured using individual items of the  
35  
36 Child Health Utility (CHU-9D) and utility score [38]; d) condition-specific health-  
37  
38 related quality of life of the child (overall impact, sensory intensity, sensory  
39  
40 frequency, sensory impact, mobility, daily living, friendships and social interaction,  
41  
42 appearance, emotional reactions, and physical symptoms) measured using  
43  
44 respective subscales of the Brisbane Burn Scar Impact Profile [burn scar clinic group  
45  
46 only]; e) condition-specific health-related quality of life of parents (worry and impact)  
47  
48 measured using respective subscales of the Brisbane Burn Scar Impact Profile  
49  
50 respective subscales [burn scar clinic group only]; f) condition-specific health-related  
51  
52 quality of life of the child (physical symptoms, social interactions, emotional  
53  
54  
55  
56  
57  
58  
59  
60

1  
2  
3 functioning, psychosocial functioning) measured using respective subscales of the  
4 Infantile Hemangioma Quality of Life Scale [infantile hemangioma vascular clinic  
5 group only]; g) condition-specific health-related quality of life of parents  
6 (psychosocial functioning, negative mood, and self-worth) measured using  
7 respective subscales of the CARE parent questionnaire [burn scar clinic group only];  
8 h) condition-specific health-related quality of life of parents (relationship and work,  
9 budget) measured using the relationships and work dimension and single budget  
10 item of the Hemangioma Family Burden questionnaire; i) number and type of  
11 referrals for the child or parent; and j) parent overall satisfaction with treatment.  
12  
13 Parent overall satisfaction with treatment was based on the finding that significantly  
14 more intervention patients reported satisfaction with overall care in a study of  
15 children with diabetes, which was the only paediatric study that examined this  
16 outcome in a recent systematic review [4]. The number and type of referrals was  
17 included as an outcome based on the findings of three paediatric studies identified in  
18 a recent systematic review, in which two studies reported an increase in the referral  
19 rates in the intervention group, and one study identified no difference in referral rates  
20 between intervention and control groups [9]. A description of each of the outcomes  
21 and psychometric properties of outcomes are reported in Supplementary File 1.  
22  
23 Adverse effects of the PROM interventions will be monitored using the self-report of  
24 parent and child participants (where appropriate), treating health professionals as  
25 well as by monitoring of the PROM data by investigators.  
26  
27  
28  
29  
30  
31  
32  
33  
34  
35  
36  
37  
38  
39  
40  
41  
42  
43  
44  
45  
46  
47  
48  
49  
50  
51  
52  
53

#### 54 Other outcomes

55 Sociodemographic data collected from or about parents will include the parent's  
56 relationship to the child, level of education, ethnicity, work status, household income,  
57  
58  
59  
60

1  
2  
3 and postcode; and from children aged 8 years or older or parents about their children  
4 will include, gender, ethnicity, education level, scar location and comorbidities of the  
5 child participants. Clinical data collected from electronic medical records will be  
6 percent total body surface area, percent full thickness burn, length of time post-burn,  
7 type of healing (e.g., spontaneous skin healing versus split thickness graft), type of  
8 burn, and length of time to re-epithelialisation, medications and complications during  
9 the study period.

### 19 Effectiveness evaluation

21 Descriptive statistics will be used to report the characteristics of the sample. The  
22 number of participants excluded based on the exclusion criteria will also be reported  
23 (e.g., difficulty speaking English). An intention to treat analysis will be the primary  
24 approach but per protocol analyses will be compared to the intention to treat  
25 approach to examine the effect of those who didn't receive the intervention as  
26 intended. The key sociodemographic and clinical characteristic data that will be  
27 examined for baseline differences between the groups will be age, gender,  
28 education, household income, socioeconomic status of the neighbourhood where the  
29 family reside based on postcode, severity of baseline symptoms and health-related  
30 quality of life, body location of the condition, visibility of the condition (scars on the  
31 head, neck, face or hands), and time since the skin condition commenced or injury  
32 occurred. Baseline differences in informant (parent proxy and child self-report) will  
33 also be examined between the groups.

### 51 Effectiveness analysis

54 Primary outcome comparison at 6-month post-baseline will be based on overall  
55 health from the Pediatric Evaluation of Quality of Life Inventory between the  
56 intervention and comparison group using linear mixed-effects models that account  
57  
58  
59  
60

1  
2  
3 for repeated observations from the same child and clustering within clinics and within  
4  
5 treating health professionals. Covariables will be included for potentially confounding  
6  
7 variables if any differences between groups are identified for key sociodemographic,  
8  
9 and clinical characteristics at baseline. The analysis population will consist of all  
10  
11 participants who have analysable data. To investigate possible effects of informant,  
12  
13 age, and gender, a pre-specified subgroup analyses of the primary and secondary  
14  
15 health-related quality of life outcomes will be stratified by informant (proxy versus  
16  
17 child report), child age (0-24 months versus 2-8 years versus 8+years; except for  
18  
19 CHU-9D which will be 3-8 years versus 8+years) and gender (male vs female) to  
20  
21 determine whether effect differences exist based on these factors. A sensitivity  
22  
23 analysis will be conducted to compare the results of the parent proxy versus child  
24  
25 self-report where available.  
26  
27  
28  
29  
30  
31  
32

33 A sensitivity analysis will also be conducted using imputation techniques to replace  
34  
35 non-ignorable data that is considered to be missing at random over the follow-up  
36  
37 period, to determine whether bias is likely in the complete case analysis. A further  
38  
39 sensitivity analysis will investigate the possibility of imbalance in severity of health-  
40  
41 related quality of life in the two clinics at baseline. As well as reporting the results for  
42  
43 generic health-related quality of life across the clinics, we will also report after  
44  
45 stratifying by clinic. Secondary outcome comparisons will be conducted at 6-months  
46  
47 post-baseline using linear mixed-effects models where appropriate. Multi-level or  
48  
49 nested hierarchical analysis will examine the effect of clinic and treating health  
50  
51 professional effects by examining patient clustering within clinics, and surgeons and  
52  
53 occupational therapists clustered within clinics. The amount and type of missing data  
54  
55 will be reported using descriptive statistics. The maximum potential effect of the  
56  
57  
58  
59  
60

1  
2  
3 intervention with children will be analysed according to the treatment actually  
4 received (an 'as treated' analysis incorporating treatment dose received). Data  
5  
6 analysis will be conducted using Stata 16.0 (Statacorp, College Station, TX, USA).  
7  
8  
9

#### 10 Implementation outcomes

11  
12 Implementation will be considered successful if graphical displays of result  
13  
14 summaries are presented to treating clinicians immediately prior to more than 85% of  
15  
16 consultations where a patient is randomised to receive a report, and if PROMs and  
17  
18 summaries are filed in electronic medical records for more than 75% of patients  
19  
20 eligible to have PROM data provided to treating clinicians in the intervention period.  
21  
22 The implementation outcomes of acceptability and sustainability [39] will be used to  
23  
24 determine the overall success of the implementation. The implementation outcomes  
25  
26 of acceptability, sustainability, cost, fidelity and contextual factors are detailed in  
27  
28  
29  
30  
31 Table 2.  
32  
33  
34  
35  
36  
37  
38  
39  
40  
41  
42  
43  
44  
45  
46  
47  
48  
49  
50  
51  
52  
53  
54  
55  
56  
57  
58  
59  
60

Table 2 Description of the implementation outcomes

| Outcome                                            | Detailed description of the outcome                                                                                                                                                                                                                                                                                                                                                                                                                                                                                                                                                                                                                                                                                                                                                                                                                                                                                                                    | Data type, source and analysis                                                                                                                                                                                                                                                                                                                                             |
|----------------------------------------------------|--------------------------------------------------------------------------------------------------------------------------------------------------------------------------------------------------------------------------------------------------------------------------------------------------------------------------------------------------------------------------------------------------------------------------------------------------------------------------------------------------------------------------------------------------------------------------------------------------------------------------------------------------------------------------------------------------------------------------------------------------------------------------------------------------------------------------------------------------------------------------------------------------------------------------------------------------------|----------------------------------------------------------------------------------------------------------------------------------------------------------------------------------------------------------------------------------------------------------------------------------------------------------------------------------------------------------------------------|
| Acceptability of the interventions and evaluation* | <p>The acceptability of the ePROM interventions and evaluation by families of children with health conditions and treating clinicians including content, complexity, delivery and relative advantage [39] and reflecting and evaluating (including the ability to meet needs of people who have difficulty speaking or understanding written English in the future).*</p> <ol style="list-style-type: none"> <li>1. <math>\geq 80\%</math> of families will take <math>&lt; 15</math> minutes to complete the ePROMs as previous research has identified that PROMs that are fast to complete are most acceptable to clinicians and families [40].</li> <li>2. <math>\geq 50\%</math> of families completed ePROMs across all scheduled consultations that were eligible to be included in the study, where consultations eligible to be included were limited to one consultation over any 1-month period. Based on pre-intervention phase</li> </ol> | <p>Quantitative: Electronic study data and administrative data; descriptive analysis</p> <p>Qualitative: interview and field note data; thematic analysis including mapping to CFIR innovation constructs (e.g., relative advantage, adaptability, complexity, cost in the pre-implementation and implementation stages; and reflecting and evaluating, design quality</p> |



1  
2  
3  
4 interviews and field notes of what was considered and packaging,  
5 acceptable for ongoing implementation of the PROMs compatability, and  
6 routinely in clinical practice in the study clinics and relative priority in the  
7 evidence indicating completion rates of 75% were implementation phase).  
8 achieved for system-wide implementation of PROMs at  
9 a Canadian children's hospital [41].  
10  
11  
12  
13

- 14 3. Phone reminders for PROM completion were required  
15 in  $\leq 50\%$  of families. This outcome was based on  
16 feedback from clinicians in the pre-implementation  
17 phase indicating that phone call reminders for this type  
18 of intervention are a burden to clinicians and may  
19 impact uptake by clinicians.  
20  
21 4. Technology-related issues with graphical displays of  
22 result summaries or ePROM completion were present  
23 for  $\leq 10\%$  of families across all eligible appointments.  
24  
25 5.  $\geq 75\%$  of participants eligible to have ePROM data  
26 provided to treating clinicians had intervention ePROMs  
27 and graphical displays filed in electronic medical  
28 records.  
29  
30  
31  
32  
33  
34  
35  
36  
37  
38  
39  
40  
41  
42  
43  
44  
45  
46

1  
2  
3 Sustainability of ePROM  
4 interventions and  
5 evaluation  
6  
7  
8  
9  
10  
11  
12  
13  
14  
15  
16  
17  
18  
19  
20  
21  
22  
23

The extent to which the ePROM intervention (or a modification of the intervention) was continued or planned to be continued in routine clinical practice at the end of the study, and barriers and facilitators of sustained use.

Qualitative: Interviews with child, parent and health professional participants and field notes; analysed using thematic analysis and mapping to CFIR (e.g., knowledge and beliefs about the intervention, design quality and packaging, needs and resources)

24 Cost  
25  
26  
27  
28  
29  
30  
31  
32  
33  
34  
35  
36  
37  
38  
39  
40  
41  
42  
43  
44  
45  
46

The cost of implementing the intervention for patients in the intervention and control groups based on resource use from the perspective of the health service.

Qualitative: interview data relating to cost.

Data for healthcare resource utilisation for co-interventions for skin treatment (e.g. medicines, complementary treatments), and details of hospital presentations), will be included.

Quantitative: Study and administrative data, medical records, hospital clinical costings department data.

1  
2  
3  
4  
5  
6  
7  
8  
9  
10  
11  
12  
13  
14  
15  
16  
17  
18  
19  
20  
21  
22  
23  
24  
25  
26  
27  
28  
29  
30  
31  
32  
33  
34  
35  
36  
37  
38  
39  
40  
41  
42  
43  
44  
45  
46

Fidelity

The extent to which the interventions were delivered and received as intended.

1. Dose of the intervention: Child and parent verbal report of the topics on the graphical displays of ePROM results that were discussed during the consultation in the intervention group, immediately after the consultation.
2. Dose of the intervention: percentage of eligible consultations for each participant where ePROM data was completed in advance of the consultation as scheduled.
3. The number (percentage) of participants randomised to receive graphical displays of result summaries versus the number of participants who actually had graphical displays of result summaries delivered to consultations.
4. Amount and type of missing intervention-related ePROM data on Qualtrics<sup>XM</sup> [27].

Qualitative: Verbal fidelity reports and interviews with children and parents, and interviews with health professional participants and field notes

Quantitative: Study data, descriptive analysis

## Contextual factors

Barriers and facilitators to multi-level implementation of the intervention and the evaluation; at the individual level, clinic level, hospital level, and outside the hospital setting.

Qualitative: Interviews with child, parent and health professional participants; and field notes analysed using thematic analysis and mapping to CFIR (e.g., culture, networks and communication, implementation cost)

---

\* Children  $\geq 8$  years will self-report; parents will provide proxy-reports for children aged  $< 8$  years except for satisfaction with treatment which will only be self-reported by parents.

ePROMs, electronic patient-reported outcome measures; CFIR, Consolidated Framework for Implementation Research

### Implementation evaluation

Implementation outcomes will be evaluated using interviews; health service, administrative, clinical costings and missing data; observational field notes of meetings and each clinic attended or planned; meeting minutes and study emails; and fidelity reports. Acceptability is defined as the perception among stakeholders that a treatment, service, practice or innovation is agreeable or satisfactory [39]. Sustainability is defined as the extent that a newly implemented treatment is maintained within a service setting's ongoing, stable operations [39]. The ways in which the needs of people with difficulty speaking or understanding written English can best be addressed in the future will be explored in interviews as part of understanding acceptability and sustainability, as these groups were excluded from participation. The data from these sources will be mapped to the Consolidated Framework for Implementation Research [29]. This framework can be used to understand barriers and facilitators to implementing the intervention at the level of individuals, the organisational level and settings external to the organisation which can assist in determining the sustainability and potential scaling up of the intervention. Factors related to implementation delivery that might have impacted on the intervention effectiveness will also be examined to understand whether and how the expected outcomes were achieved, and the reasons for this.

Fidelity of the intervention will be taken from study records kept by researchers.

Immediately after face-to-face consultations parents and children (where appropriate) will be requested to verbally report the graphical display topics that were discussed during the consultation in the intervention group.

### Implementation analysis

1  
2  
3 Interpretive Description [42] will be used to thematically analyse the data. This  
4  
5 qualitative analysis uses elements from several other qualitative methodologies  
6  
7 including phenomenology, grounded theory, and ethnography without focusing on  
8  
9 any specific technique [42]. Interpretive Description is ideal for applied clinical  
10  
11 questions and analysis of a wide range of data sources [42]. The analysis builds on  
12  
13 what is known in terms of current practices and structures of health services and  
14  
15 what is known and not known [42]. Data analysis will be conducted iteratively,  
16  
17 concurrently with interviews, with analysis conducted during the implementation  
18  
19 phase building on analysis of pre-implementation interviews. Framework analysis  
20  
21 [43] will then be applied deductively, mapping the qualitative and quantitative data  
22  
23 (e.g., verbatim quotes and descriptive statistics) to the pre-defined key constructs of  
24  
25 the Consolidated Framework for Implementation Research as overarching themes.  
26  
27 The data will be organised into a framework matrix where columns are codes and  
28  
29 rows are participants [43]. This analysis is conducted across participants as well as  
30  
31 within participants. Steps in framework analysis include familiarization; indexing;  
32  
33 charting; and synthesising [43]. Pre-implementation and post-implementation  
34  
35 differences will be examined, and themes that emerge in addition to the  
36  
37 Consolidated Framework for Implementation Research constructs, will be added to  
38  
39 the framework. Positive and negative participant quotes and descriptive data will be  
40  
41 examined separately for each construct in the framework to determine influences on  
42  
43 implementation and the strength of each construct, for each clinics as well as across  
44  
45 clinics [44]. Once mapping to the Consolidated Framework for Implementation  
46  
47 Research has been completed, data that applies to the implementation outcomes of  
48  
49 acceptability, sustainability, fidelity and contextual factors will then be summarised.  
50  
51  
52  
53  
54  
55  
56  
57  
58  
59  
60

1  
2  
3 Interviews will be audio recorded and transcribed verbatim by study personnel.  
4  
5 Recordings will be stored in a coded form on a secure password protected folder  
6  
7 within The University of Queensland until coding has been completed, accessible to  
8  
9 two of the investigators and a research assistant. The credibility of the analysis will  
10  
11 be checked using member checking of the interview data, independent coding of the  
12  
13 data by two researchers of at least 20 percent of the data, triangulation of the results  
14  
15 across participant groups (managers, treating health professionals, parent and child  
16  
17 participants) and using field notes, and reflective journaling. Microsoft excel (version  
18  
19 16, Microsoft Corporation) and NVivo (version 10, QSR International, Doncaster,  
20  
21 Victoria, Australia [45]) will be used to organise and code the data.  
22  
23  
24

#### 25 26 Electronic platform

27  
28 The electronic survey platform Qualtrics<sup>XM</sup> [27] was chosen to administer the  
29  
30 PROMs and to provide graphical displays of result summaries based on visual  
31  
32 aesthetics of the graphical displays compared to other survey programs and prior  
33  
34 experience of the investigators using the program. Features of the program that were  
35  
36 important for administration of the chosen surveys and study design were the ability  
37  
38 to have open-ended text, email distribution, ability to send reminders, display  
39  
40 longitudinal responses, a recoding values function, automated scoring functionality,  
41  
42 and links to NVivo software [45] for coding open text responses.  
43  
44  
45

#### 46 47 Patient and public involvement

48  
49 Children aged 8 years and older with life-altering skin conditions, parents of children  
50  
51 with life-altering skin conditions and treating health professionals in the study setting  
52  
53 were involved in all study phases including development of the intervention, process  
54  
55 evaluation, study design and implementation evaluation. These stakeholder groups  
56  
57 reported on the burden of the planned intervention, potential time required to  
58  
59  
60

1  
2  
3 participate and acceptability of follow-up intervals in pre-implementation interviews.

4  
5 Plans include forming a stakeholder reference group to inform the interpretation and  
6  
7 sustainability of the study findings.  
8  
9

## 10 11 12 **DISCUSSION**

13  
14 To our knowledge studies of PROM interventions have not previously focused on  
15  
16 children with life-altering skin conditions. A pragmatic approach has been taken to  
17  
18 maximise relevance to the clinical context including limiting exclusion criteria, and  
19  
20 developing and delivering an intervention that has limited interference with the  
21  
22 running of very busy outpatient clinics. If the intervention is shown to have promising  
23  
24 short-term results then secondary prevention impacts particularly on emotional  
25  
26 health of parents may be likely and the benefits higher in the longer term which will  
27  
28 be examined in the future.  
29  
30  
31  
32  
33

34  
35 An outcome of the proposed study may be refinement of the intervention based on  
36  
37 mapping to the Consolidated Framework for Implementation Research which may  
38  
39 identify additional elements that should be considered. The findings will also likely  
40  
41 inform the design of a multisite cluster effectiveness-implementation study of a  
42  
43 patient-reported outcome measure intervention in these children which may reduce  
44  
45 the risk of contamination bias [8]. Information obtained will inform ongoing efforts in  
46  
47 paediatric care to use patient-reported outcome measures as part of routine clinical  
48  
49 care.  
50  
51  
52

### 53 **Strengths and limitations**

54  
55 Strengths of the study include the involvement of stakeholders representing multiple  
56  
57 perspectives (children, parents, health professionals) in the development of the  
58  
59  
60



1  
2  
3 intervention and the process evaluation, and the focus of the intervention and  
4 process evaluation on health-related quality of life. The use of the Consolidated  
5 Framework for Implementation Research is also a strength. Theory-based  
6  
7  
8  
9  
10 interventions tend to be more effective than non-theory based interventions [46].  
11  
12 More specifically, the current study will seek to understand how the inner setting of  
13 the organisation (i.e., organisational culture and structural characteristics) impacts on  
14  
15  
16  
17 implementation which has been identified as a research gap [10].  
18  
19  
20

21  
22 The lack of masking of treating health professionals and participants in the  
23  
24  
25  
26  
27  
28  
29  
30  
31  
32  
33  
34  
35  
36  
37  
38  
39  
40  
41  
42  
43  
44  
45  
46  
47  
48  
49  
50  
51  
52  
53  
54  
55  
56  
57  
58  
59  
60  
The lack of masking of treating health professionals and participants in the  
randomised controlled trial is a limitation although masking is not possible as the  
outcomes are patient or proxy-reported and it will be clear to most participants when  
results are presented in consultations. However, child and parent participants will be  
masked to the hypotheses. Potential contamination bias has also been raised as a  
possibility in trials of this nature where several clinics within a facility are included, as  
treating health professionals' awareness of issues that should be focused on may be  
raised, diluting the impact of the intervention [47].

A limitation is the lack of inclusion of children and parents who have difficulty  
speaking or understanding English. Further attention is required to develop and test  
ePROM interventions for families from specific cultural backgrounds which is a  
challenge in the study setting where people from diverse cultural backgrounds are  
seen. Specifically, people of Aboriginal and Torres Strait Islander descent were not  
involved in the development process thus the intervention and study design may not  
be acceptable for this group of people and should be established.

### **Ethical approval and dissemination**

Ethical approval has been received from Children's Health Queensland Hospital and Health Service Human Research Ethics Committee (HREC/19/QCHQ/56290), The University of Queensland (2019002233), and Queensland University of Technology (1900000847).

Written consent will be obtained from parent and treating health professional participants once written and verbal information has been provided. Parents will be encouraged to discuss the study with children who can communicate with their parents prior to consent being obtained. Adverse effects will be reported to the Children's Health Queensland Hospital and Health Service and Human Research Ethics Committees.

## References

1. De Rosis S, Cerasuolo D, Nuti S. Using patient-reported measures to drive change in healthcare: the experience of the digital, continuous and systematic PREMs observatory in Italy. *BMC Health Serv Res* 2020;**20**(1):315.
2. Basch E. Patient-Reported Outcomes - Harnessing Patients' Voices to Improve Clinical Care. *N Engl J Med* 2017;**376**(2):105-08.
3. Field J, Holmes MM, Newell D. PROMs data: can it be used to make decisions for individual patients? A narrative review. *Patient Relat Outcome Meas* 2019;**10**:233-41.
4. Ishaque S, Karnon J, Chen G, et al. A systematic review of randomised controlled trials evaluating the use of patient-reported outcome measures (PROMs). *Qual Life Res* 2019;**28**(3):567-92.
5. de Wit M, Delemarre-van de Waal HA, Bokma JA, et al. Monitoring and discussing health-related quality of life in adolescents with Type 1 diabetes improve psychosocial well-Being. *Diabetes Care* 2008;**31**(8):1521.
6. Wolfe J, Orellana L, Cook EF, et al. Improving the care of children with advanced cancer by using an electronic patient-reported feedback intervention: results from the PediQUEST randomized controlled trial. *J Clin Oncol* 2014;**32**(11):1119-26.
7. Bickman L, Douglas SR, De Andrade ARV, et al. Implementing a Measurement Feedback System: A Tale of Two Sites. *Adm Policy Ment Health* 2016;**43**(3):410-25.
8. de Jong RK, Snoek H, Staal WG, et al. The effect of patients' feedback on treatment outcome in a child and adolescent psychiatric sample: a randomized controlled trial. *Eur Child Adoles Psy* 2019;**28**(6):819-349.
9. Bele S, Chugh A, Mohamed B, Teela L, Haverman L, Santana MJ. Patient-

- 1  
2  
3 reported outcome measures in routine pediatric clinical care: A systematic review.  
4  
5 Front Pediatr. 2020 Jul 28;8:364.10.  
6  
7
- 8 10. Foster A, Croot L, Brazier J, et al. The facilitators and barriers to  
9  
10 implementing patient reported outcome measures in organisations delivering  
11  
12 health related services: a systematic review of reviews. *J Patient Rep*  
13  
14 *Outcomes* 2018;2(1):46.  
15  
16
- 17 11. Michie S, Carey RN, Johnston M, et al. From theory-inspired to theory-based  
18  
19 interventions: A protocol for developing and testing a methodology for linking  
20  
21 behaviour change techniques to theoretical mechanisms of action. *Ann Behav*  
22  
23 *Med* 2017;52(6):501-12.  
24  
25
- 26 12. Ahmed, S., Zidarov, D., Eilayyan, O. *et al.* Prospective application of  
27  
28 implementation science theories and frameworks to inform use of PROMs in  
29  
30 routine clinical care within an integrated pain network. *Qual Life Res* (2020).  
31  
32 <https://doi.org/10.1007/s11136-020-02600-8>.  
33  
34
- 35 13. Maskell J, Newcombe P, Martin G, et al. Psychosocial Functioning Differences in  
36  
37 Pediatric Burn Survivors Compared With Healthy Norms. *J Burn Care Res*  
38  
39 2013;34(4):465-76.  
40  
41
- 42 14. Spuls PI, Gerbens LAA, Simpson E, et al. Patient-Oriented Eczema Measure  
43  
44 (POEM), a core instrument to measure symptoms in clinical trials: a Harmonising  
45  
46 Outcome Measures for Eczema (HOME) statement. *Br J Dermatol*  
47  
48 2017;176(4):979-84.  
49  
50
- 51 15. Chan EKH, Edwards TC, Haywood K, et al. Implementing patient-reported  
52  
53 outcome measures in clinical practice: a companion guide to the ISOQOL user's  
54  
55 guide. *Qual Life Res* 2019;28(3):621-27.  
56  
57
- 58 16. Kramer JM, Schwartz A. Reducing Barriers to Patient-Reported Outcome  
59  
60

- 1  
2  
3 Measures for People With Cognitive Impairments. *Arch Phys Med Rehabil*  
4  
5 2017;**98**(8):1705-15.  
6  
7  
8 17. Simons M, Price N, Kimble R, et al. Patient experiences of burn scars in adults  
9  
10 and children and development of a health-related quality of life conceptual  
11  
12 model: A qualitative study. *Burns* 2016;**42**(3):620-32.  
13  
14  
15 18. Tyack Z, Ziviani J, Kimble R, et al. Measuring the impact of burn scarring on  
16  
17 health-related quality of life: Development and preliminary content validation of  
18  
19 the Brisbane Burn Scar Impact Profile (BBSIP) for children and adults. *Burns*  
20  
21 2015;**41**(7):1405-19.  
22  
23  
24 19. Arbuckle R, Abetz-Webb L. "Not Just Little Adults": Qualitative methods to  
25  
26 support the development of pediatric patient-reported outcomes. *Patient* 2013;  
27  
28 **6**: 143–159.  
29  
30  
31 20. Varni JW, Limbers CA, Neighbors K, et al. The PedsQL Infant Scales: feasibility,  
32  
33 internal consistency reliability, and validity in healthy and ill infants. *Qual Life*  
34  
35 *Res* 2011;**20**(1):45-55.  
36  
37  
38 21. Varni JW, Seid M, Knight TS, et al. The PedsQLTM 4.0 Generic Core Scales:  
39  
40 sensitivity, responsiveness, and impact on clinical decision-making. *J Behav*  
41  
42 *Med* 2002;**25**(2):175-93.  
43  
44  
45 22. Wiebe S, Guyatt G, Weaver B, et al. Comparative responsiveness of generic  
46  
47 and specific quality-of-life instruments. *J Clin Epidemiol* 2003;**56**:52–60.  
48  
49  
50 23. Griffiths C, D. H. CARE Burn Scales- Parent Quality of Life Form Version 1,  
51  
52 2018.  
53  
54  
55 24. Boccara O, Meni C, Leaute-Labreze C, et al. Haemangioma family burden:  
56  
57 creation of a specific questionnaire. *Acta Derm Venereol* 2015;**95**(1):78-82.  
58  
59  
60 25. Chamlin SL, Mancini AJ, Lai JS, et al. Development and validation of a quality-

- 1  
2  
3 of-life instrument for infantile hemangiomas. *J Invest Dermatol*  
4  
5 2015;**135**(6):1533-39.  
6  
7  
8 26. Hoffmann T, Glasziou P, Boutron I, et al. Better reporting of interventions:  
9  
10 template for intervention description and replication (TIDieR) checklist and  
11  
12 guide. *BMJ* 2014;348:g1687.  
13  
14  
15 27. Qualtrics. Qualtrics: Survey Research Suite. 2014; Available from:  
16  
17 <http://www.qualtrics.com/> (Accessed June 16 2020).  
18  
19  
20 28. Curran GM, Bauer M, Mittman B, et al. Effectiveness-implementation hybrid  
21  
22 designs: combining elements of clinical effectiveness and implementation  
23  
24 research to enhance public health impact. *Med Care* 2012;**50**(3):217-26.  
25  
26  
27 29. Damschroder LJ, Aron DC, Keith RE, et al. Fostering implementation of health  
28  
29 services research findings into practice: a consolidated framework for advancing  
30  
31 implementation science. *Implement Sci* 2009;**4**(1):50.  
32  
33  
34 30. Eysenbach G, CONSORT-EHEALTH Group. CONSORT-EHEALTH: Improving  
35  
36 and Standardizing Evaluation Reports of Web-based and Mobile Health  
37  
38 Interventions. *J Med Internet Res* 2011;13(4):e126.  
39  
40  
41 31. Wiseman J, Ware R, Simons M, et al. Effectiveness of topical silicone gel and  
42  
43 pressure garment therapy for burn scar prevention and management in children:  
44  
45 a randomized controlled trial. *Clin Rehabil* 2020; **34**(1): 120–31.  
46  
47  
48 32. Frear CC , Cuttle L, McPhail SM, Chatfield MD, Kimble RM, Griffin BR.  
49  
50 Randomized clinical trial of negative pressure wound therapy as an adjunctive  
51  
52 treatment for small-area thermal burns in children. *Br J Surg.* 2020; **107**(13):  
53  
54 1741–1750.  
55  
56  
57  
58  
59  
60

- 1  
2  
3 33. Stockton KA, Harvey J, Kimble RM. (2015). A prospective observational study  
4  
5 investigating all children presenting to a specialty paediatric burns centre. *Burns*.  
6  
7 2015; **41**(3): 476-483.  
8  
9
- 10 34. Ravens-Sieberer U, Erhart M, Wille N, Wetzel R, Nickel J, Bullinger M. Generic  
11  
12 health-related quality-of-life assessment in children and adolescents:  
13  
14 methodological considerations. *Pharmacoeconomics*. 2006; **24**(12):1199-220.  
15  
16
- 17 35. Stevanovic D, Atilola O, Vostanis P, et al. Cross-Cultural Measurement  
18  
19 Invariance of Adolescent Self-Report on the Pediatric Quality of Life  
20  
21 Inventory™ 4.0. *J Res Adolesc*. 2016; **26**: 687-695.  
22  
23
- 24 36. Spronk I, Legemate CM, Polinder S, et al. Health-related quality of life in children  
25  
26 after burn injuries: A systematic review. *J Trauma Acute Care Surg*. 2018; **85**(6).  
27  
28
- 29 37. Vasileiou K, Barnett J, Thorpe S, et al. Characterising and justifying sample size  
30  
31 sufficiency in interview-based studies: systematic analysis of qualitative health  
32  
33 research over a 15-year period. *BMC Med Res Methodol* 2018;**18**(1):148-48.  
34  
35
- 36 38. Stevens K. Valuation of the Child Health Utility 9D Index. *PharmacoEconomics*  
37  
38 2012;**30**(8):729-47.  
39
- 40 39. Proctor E, Silmere H, Raghavan R, et al. Outcomes for implementation research:  
41  
42 conceptual distinctions, measurement challenges, and research agenda. *Adm*  
43  
44 *Policy Ment Health* 2011;**38**(2):65-76.  
45  
46
- 47 40. Teela L, van Muilekom MM, Kooij LH, et al. Clinicians' perspective on the  
48  
49 implemented KLIK PROM portal in clinical practice. *Qual Life Res* 2020.  
50  
51 <https://doi.org/10.1007/s11136-020-02522-5>  
52  
53
- 54 41. Gerhardt WE, Mara CA, Kudel I, Morgan EM, Schoettker PJ, Napora J, Britto  
55  
56 MT, Alessandrini EA. Systemwide implementation of patient-reported  
57  
58 outcomes in routine clinical care at a children's hospital. *Jt Comm J Qual*  
59  
60

- 1  
2  
3 *Patient Saf.* 2018;**44**(8):441-53.  
4  
5  
6 42. Thorne. S. Interpretive Description: Qualitative Research for Applied Practice.  
7  
8 Second ed. New York: Routledge, 2016.  
9  
10 43. Gale NK, Heath G, Cameron E, et al. Using the framework method for the  
11  
12 analysis of qualitative data in multi-disciplinary health research. *BMC Med Res*  
13  
14 *Methodol* 2013;**13**:117-17.  
15  
16 44. Varsi C, Ekstedt M, Gammon D, et al. Using the Consolidated Framework for  
17  
18 Implementation Research to identify barriers and facilitators for the  
19  
20 implementation of an internet-based patient-provider communication service in  
21  
22 five settings: A qualitative study. *J Med Internet Res.* 2015;**17**(11):e262.  
23  
24 45. NVivo 10 [software program]. Version 10. QSR International.  
25  
26 [http://www.qsrinternational.com/products\\_nvivo.aspx](http://www.qsrinternational.com/products_nvivo.aspx) (Accessed June 16, 2020).  
27  
28 46. Albarracín D, Gillette JC, Earl AN, et al. A test of major assumptions about  
29  
30 behavior change: A comprehensive look at the effects of passive and active HIV-  
31  
32 prevention interventions since the beginning of the epidemic. *Psychological*  
33  
34 *Bulletin* 2005;**131**(6):856-97.  
35  
36 47. Greenhalgh J, Dalkin S, Gooding K, et al. Functionality and feedback: a realist  
37  
38 synthesis of the collation, interpretation and utilisation of patient-reported  
39  
40 outcome measures data to improve patient care. *Health Services and Delivery*  
41  
42 *Research* 2017;**5**(2).  
43  
44  
45  
46  
47  
48  
49  
50  
51

## 52 **Author contributions**

53  
54 ZT designed the study with input from SM and RW for the effectiveness evaluation,  
55  
56 GH for the implementation evaluation, and RK and MS for integrating with existing  
57  
58  
59  
60



1  
2  
3 clinical processes. ZT drafted the protocol and SM, MS, TZ, RW and RK critically  
4 revised the manuscript.  
5  
6  
7

### 8 **Funding statement**

9  
10 This work was supported by a Health Services Research grant from the Children's  
11 Hospital Foundation, Brisbane, grant number 50297. The funder had no input into  
12 the design or conduct of the study.  
13  
14  
15  
16  
17

### 18 **Competing interests statement**

19  
20 ZT, MS and RK developed the Brisbane Burn Scar Impact Profile which was  
21 included as a scar-specific measure in this study. MS and RK were clinical staff  
22 members of the health service where the study will be conducted at the time of  
23 submission.  
24  
25  
26  
27  
28  
29  
30

### 31 **Data sharing statement**

32  
33 The final trial dataset will be available to chief investigators. The final trial dataset  
34 may be accessed with approval from the investigators if steps are undertaken to  
35 preserve the confidentiality of the data. Additional information regarding criteria for  
36 accessing data are available from the study investigators.  
37  
38  
39  
40  
41  
42  
43  
44

### 45 **Acknowledgements**

46 Nil  
47

### 48 **Figure 1 legend**

49 SPIRIT flow diagram for the effectiveness study component\*  
50

51 **Word count 5242**  
52  
53  
54  
55  
56  
57  
58  
59  
60

| STUDY PERIOD                                                      |                       |                              |                                                                 |                                                                 |
|-------------------------------------------------------------------|-----------------------|------------------------------|-----------------------------------------------------------------|-----------------------------------------------------------------|
|                                                                   | <i>Enrolment</i>      | <i>Allocation</i>            | <i>Post-allocation</i>                                          |                                                                 |
| <b>TIMEPOINT</b>                                                  | <i>-t<sub>1</sub></i> | <b>0</b><br><i>Baseline*</i> | <i>t<sub>1</sub></i><br><i>3-months</i><br><i>post-baseline</i> | <i>t<sub>2</sub></i><br><i>6-months</i><br><i>post-baseline</i> |
| <b>ENROLMENT:</b>                                                 |                       |                              |                                                                 |                                                                 |
| <b>Eligibility screen</b>                                         | X                     |                              |                                                                 |                                                                 |
| <b>Informed consent</b>                                           | X                     | X                            |                                                                 |                                                                 |
| <b>Allocation</b>                                                 |                       | X                            |                                                                 |                                                                 |
| <b>INTERVENTIONS:</b>                                             |                       |                              |                                                                 |                                                                 |
| <b><i>PEDS-ePROM</i></b>                                          |                       | ◄                            | —————                                                           | ►                                                               |
| <b><i>ePROM</i></b>                                               |                       | ◄                            | —————                                                           | ►                                                               |
| <b>EVALUATIONS:</b>                                               |                       |                              |                                                                 |                                                                 |
| <b><i>Sociodemographic details</i></b>                            |                       | X                            |                                                                 |                                                                 |
| <b><i>Clinical characteristics</i></b>                            |                       | X                            |                                                                 |                                                                 |
| <b><i>PEDS-QL (Infant &amp; generic scales)</i></b>               |                       | X                            | X                                                               | X                                                               |
| <b><i>Brisbane Burn Scar Impact Profile**</i></b>                 |                       | X                            | X                                                               | X                                                               |
| <b><i>CARe Burn Scales**</i></b>                                  |                       | X                            | X                                                               | X                                                               |
| <b><i>Haemangioma Family Burden Questionnaire***</i></b>          |                       | X                            | X                                                               | X                                                               |
| <b><i>Infantile Haemangioma Quality-of-Life Instrument***</i></b> |                       | X                            | X                                                               | X                                                               |
| <b><i>Satisfaction with treatment</i></b>                         |                       |                              | X                                                               | X                                                               |
| <b><i>Referrals</i></b>                                           |                       |                              | X                                                               | X                                                               |

\*Baseline measures completed prior to randomization; ≥2<sup>nd</sup> appointment vascular clinic, ≥1<sup>st</sup> appointment scar clinic; \*\* burn scar clinic only; \*\*\* vascular clinic only

Figure 1

Supplementary File 1 Details of the outcomes in the intervention and effectiveness evaluation

| Outcome                                                          | Outcome measure                          | Participant of focus | Domains, subscales, items or versions used in the study                                                                                | Used in study intervention or evaluation | Description                                                                                                                                                                                                                                                                                                        | Psychometrics                                                                                                                                                                                                                               |
|------------------------------------------------------------------|------------------------------------------|----------------------|----------------------------------------------------------------------------------------------------------------------------------------|------------------------------------------|--------------------------------------------------------------------------------------------------------------------------------------------------------------------------------------------------------------------------------------------------------------------------------------------------------------------|---------------------------------------------------------------------------------------------------------------------------------------------------------------------------------------------------------------------------------------------|
| Generic health-related quality of life                           | CHU-9D                                   | Child                | All items<br>3 to 5 years (parent proxy)<br>5 to 7 years (parent proxy)<br>7 to 8 years (parent proxy)<br>≥ 8 years version (child)    | Evaluation                               | A measure of health-related quality of life that can be used with child aged 3 years and older. The parent proxy version for children aged 3 to 5 years has 10 items with an additional item on overall health compared to 9-item versions for other versions.                                                     | A reliable and valid measure recommended for economic evaluations in paediatric settings [1-3]. 3-5 year version has not yet been validated (personal communication, Katherine Stevens). The item on schoolwork/homework has been modified. |
| Generic health-related quality of life (primary outcome measure) | PEDS-QL 4.0<br>Generic and Infant Scales | Child                | All items<br>2-4 years (parent proxy)<br>5-7 years (parent proxy)<br>8-12 years (child self-report)<br>13-18 years (child self-report) | Evaluation and intervention              | Generic 4.0 scale: 23 items, 4 domains (physical, emotional, social and school functioning), 3 summary scores (psychosocial health, physical health, total score). Scores will be transformed on a 0 to 100 and scored as recommended by the developers (Mapi Research Trust and Varni, 2017, scaling and scoring, | Validation (including reproducibility and responsiveness testing) supported for children with acute and chronic conditions including those in a hospital setting [4,5].                                                                     |

version 17, available from <http://www.pedsql.org/PedsQL-Scoring.pdf>, accessed 11.05.2020).

|                                                   |                                         |                     |                                                                                  |                             |                                                                                                                                                                                                                                                                                                                                           |                                                                                                                                                                                                                                                                        |
|---------------------------------------------------|-----------------------------------------|---------------------|----------------------------------------------------------------------------------|-----------------------------|-------------------------------------------------------------------------------------------------------------------------------------------------------------------------------------------------------------------------------------------------------------------------------------------------------------------------------------------|------------------------------------------------------------------------------------------------------------------------------------------------------------------------------------------------------------------------------------------------------------------------|
| Condition-specific health-related quality of life | The Brisbane Burn Scar Impact Profile   | Child and caregiver | All items Children < 8 years (parent proxy)<br>Children 8-18 (child self-report) | Evaluation and intervention | Groups of items measured were overall impact of burn scars; frequency and impact of itch, pain and other sensations; school, play and daily activities (includes mobility and activities of daily living items); friendships and social interactions; appearance; emotional reactions; physical symptoms; and parent and family concerns. | Content validity (children with burn scars and caregiver involvement in development) [6]. Psychometric testing in children and caregivers has largely supported longitudinal validity, reproducibility and responsiveness from around the time of wound healing [7,8]. |
| Condition-specific health-related quality of life | CARe Burn Scales                        | Caregiver           | 15 items Parent self-report                                                      | Evaluation and intervention | Self-worth and negative mood parent scale items.                                                                                                                                                                                                                                                                                          | Content validity (caregivers of children with burns involved in development). Further validity testing is underway but not yet published (personal communication, Catrin Griffiths).                                                                                   |
| Condition-specific health-related quality of life | Haemangioma Family Burden Questionnaire | Child and caregiver | 4 items Parent proxy and parent self-report                                      | Evaluation and intervention | Four items from the 20-item questionnaire were included. Three items forming the relationship and work                                                                                                                                                                                                                                    | Structural validity: internal coherence (Cronbach's $\alpha$ : 0.93). Construct validity:                                                                                                                                                                              |

1  
2  
3  
4  
5  
6  
7  
8  
9  
10  
11  
12  
13  
14  
15  
16  
17  
18  
19  
20  
21  
22  
23  
24  
25  
26  
27  
28  
29  
30  
31  
32  
33  
34  
35  
36  
37  
38  
39  
40  
41  
42  
43  
44  
45  
46

related  
quality of life

dimension were included (e.g., time spent with other children, impact of the haemangioma on career and stopping work). In addition the single item on budget and financial resources was included.

correlation with mental dimension of the Short-Form-12 ( $r = -0.75$ ), and Psychological General Well-Being Index ( $r = -0.61$ ). Discriminant validity: significant differences were found according to the size and location of the infantile haemangioma [9].

Condition-specific health-related quality of life

Infantile Haemangioma Quality-of-Life Instrument

Child and caregiver

All items of the final measure (parent proxy and parent self-report)

Evaluation and intervention

The 29 final items were included: 5 items targeting the child and the remainder targeting the caregiver. 4 subscales: child physical symptoms, child social interactions, parent emotional functioning, and parent psychosocial functioning.

Content validity (with parents involved in the development), test-retest reliability and structural validity supported [10].

Satisfaction with treatment

Study specific

Caregiver

Single item Parent self-report

Evaluation

An 11-point condition specific numeric rating scale with anchors of very dissatisfied to very satisfied will be asked similar to the numeric rating scale used in a previous study by the authors with children with burn scars and their

N/A

|           |                |                     |     |            |                                                                                                                                                                                                                                                                                                                                                                                                                                                                                                                                                                                                                      |     |
|-----------|----------------|---------------------|-----|------------|----------------------------------------------------------------------------------------------------------------------------------------------------------------------------------------------------------------------------------------------------------------------------------------------------------------------------------------------------------------------------------------------------------------------------------------------------------------------------------------------------------------------------------------------------------------------------------------------------------------------|-----|
|           |                |                     |     |            | caregivers [11] at 3-months and 6-months post-baseline.                                                                                                                                                                                                                                                                                                                                                                                                                                                                                                                                                              |     |
| Referrals | Study specific | Child and caregiver | N/A | Evaluation | The number and type of referrals for child and caregiver participants to health professionals during 6-month intervention period, including psychosocial referrals. Referrals will be those made by health professional participants receiving result summaries in their consultations. Taken from medical records. Psychosocial referrals include referrals to social work, psychology, a general practitioner, or other health professional; where the referral is clearly for psychosocial support other than that provided by the health professionals delivering consultations in the effectiveness evaluation. | N/A |

## References

1. Chen G, Flynn T, Stevens K, et al. Assessing the Health-Related Quality of Life of Australian Adolescents: An Empirical Comparison of the Child Health Utility 9D and EQ-5D-Y Instruments. *Value Health* 2015;**18**(4):432-8.
2. Stevens K. Valuation of the Child Health Utility 9D Index. *PharmacoEconomics* 2012;**30**(8):729-47.
3. Ratcliffe J, Flynn T, Terlich F, et al. Developing Adolescent-Specific Health State Values for Economic Evaluation. *PharmacoEconomics* 2012;**30**(8):713-27.

- 1
- 2
- 3
- 4 4. Desai AD, Zhou C, Stanford S, et al. Validity and responsiveness of the pediatric quality of life inventory (PedsQL) 4.0 generic  
5 core scales in the pediatric inpatient setting. *JAMA Pediatr* 2014;**168**(12):1114-21.
- 6 5. Varni JW, Seid M, Knight TS, et al. The PedsQLTM 4.0 Generic Core Scales: Sensitivity, Responsiveness, and Impact on  
7 Clinical Decision-Making. *J Behav Med* 2002;**25**(2):175-93.
- 8 6. Tyack Z, Ziviani J, Kimble R, et al. Measuring the impact of burn scarring on health-related quality of life: Development and  
9 preliminary content validation of the Brisbane Burn Scar Impact Profile (BBSIP) for children and adults. *Burns*  
10 2015;**41**(7):1405-19.
- 11 7. Simons M, Kimble R, McPhail S, et al. The longitudinal validity, reproducibility and responsiveness of the Brisbane Burn Scar  
12 Impact Profile (caregiver report for young children version) for measuring health-related quality of life in children with burn  
13 scars. *Burns* 2019;**45**(8):1792-809.
- 14 8. Simons M, Kimble R, McPhail S, et al. The Brisbane Burn Scar Impact Profile (child and young person version) for measuring  
15 health-related quality of life in children with burn scars: A longitudinal cohort study of reliability, validity and responsiveness.  
16 *Burns* 2019;**45**(7):1537-52.
- 17 9. Boccara O, Meni C, Leaute-Labreze C, et al. Haemangioma family burden: creation of a specific questionnaire. *Acta Derm*  
18 *Venereol* 2015;**95**(1):78-82.
- 19 10. Chamlin SL, Mancini AJ, Lai JS, et al. Development and Validation of a Quality-of-Life Instrument for Infantile Hemangiomas. *J*  
20 *Invest Dermatol* 2015;**135**(6):1533-39.
- 21 11. Wiseman J, Ware RS, Simons M, et al. Effectiveness of topical silicone gel and pressure garment therapy for burn scar  
22 prevention and management in children: a randomized controlled trial. *Clin Rehabil* 2019;**34**(1):120-31.
- 23
- 24
- 25
- 26
- 27
- 28
- 29
- 30
- 31
- 32
- 33
- 34
- 35
- 36
- 37
- 38
- 39
- 40
- 41
- 42
- 43
- 44
- 45
- 46

# Reporting checklist for protocol of a clinical trial.

Based on the SPIRIT guidelines.

## Instructions to authors

Complete this checklist by entering the page numbers from your manuscript where readers will find each of the items listed below.

Your article may not currently address all the items on the checklist. Please modify your text to include the missing information. If you are certain that an item does not apply, please write "n/a" and provide a short explanation.

Upload your completed checklist as an extra file when you submit to a journal.

In your methods section, say that you used the SPIRIT reporting guidelines, and cite them as:

Chan A-W, Tetzlaff JM, Altman DG, Laupacis A, Gøtzsche PC, Krleža-Jerić K, Hróbjartsson A, Mann H, Dickersin K, Berlin J, Doré C, Parulekar W, Summerskill W, Groves T, Schulz K, Sox H, Rockhold FW, Rennie D, Moher D. SPIRIT 2013 Statement: Defining standard protocol items for clinical trials. *Ann Intern Med.* 2013;158(3):200-207

|                                   | Reporting Item                                                                                                                  | Page Number |
|-----------------------------------|---------------------------------------------------------------------------------------------------------------------------------|-------------|
| <b>Administrative information</b> |                                                                                                                                 |             |
| Title                             | <a href="#">#1</a> Descriptive title identifying the study design, population, interventions, and, if applicable, trial acronym | 1           |



|    |                     |                     |                                                        |       |
|----|---------------------|---------------------|--------------------------------------------------------|-------|
| 1  | Trial registration  | <a href="#">#2a</a> | Trial identifier and registry name. If not yet         | 3     |
| 2  |                     |                     | registered, name of intended registry                  |       |
| 3  |                     |                     |                                                        |       |
| 4  |                     |                     |                                                        |       |
| 5  |                     |                     |                                                        |       |
| 6  | Trial registration: | <a href="#">#2b</a> | All items from the World Health Organization Trial     | n/a   |
| 7  |                     |                     | Registration Data Set                                  |       |
| 8  | data set            |                     |                                                        |       |
| 9  |                     |                     |                                                        |       |
| 10 |                     |                     |                                                        |       |
| 11 | Protocol version    | <a href="#">#3</a>  | Date and version identifier                            |       |
| 12 |                     |                     |                                                        |       |
| 13 |                     |                     |                                                        |       |
| 14 |                     |                     |                                                        |       |
| 15 | Funding             | <a href="#">#4</a>  | Sources and types of financial, material, and other    | 28    |
| 16 |                     |                     | support                                                |       |
| 17 |                     |                     |                                                        |       |
| 18 |                     |                     |                                                        |       |
| 19 |                     |                     |                                                        |       |
| 20 | Roles and           | <a href="#">#5a</a> | Names, affiliations, and roles of protocol             | 28    |
| 21 |                     |                     | contributors                                           |       |
| 22 | responsibilities:   |                     |                                                        |       |
| 23 |                     |                     |                                                        |       |
| 24 | contributorship     |                     |                                                        |       |
| 25 |                     |                     |                                                        |       |
| 26 |                     |                     |                                                        |       |
| 27 |                     |                     |                                                        |       |
| 28 | Roles and           | <a href="#">#5b</a> | Name and contact information for the trial sponsor     | n/a   |
| 29 |                     |                     |                                                        |       |
| 30 | responsibilities:   |                     |                                                        |       |
| 31 |                     |                     |                                                        |       |
| 32 | sponsor contact     |                     |                                                        |       |
| 33 |                     |                     |                                                        |       |
| 34 | information         |                     |                                                        |       |
| 35 |                     |                     |                                                        |       |
| 36 |                     |                     |                                                        |       |
| 37 |                     |                     |                                                        |       |
| 38 | Roles and           | <a href="#">#5c</a> | Role of study sponsor and funders, if any, in study    | 28    |
| 39 |                     |                     | design; collection, management, analysis, and          |       |
| 40 | responsibilities:   |                     | interpretation of data; writing of the report; and the |       |
| 41 |                     |                     | decision to submit the report for publication,         |       |
| 42 | sponsor and funder  |                     | including whether they will have ultimate authority    |       |
| 43 |                     |                     | over any of these activities                           |       |
| 44 |                     |                     |                                                        |       |
| 45 |                     |                     |                                                        |       |
| 46 |                     |                     |                                                        |       |
| 47 |                     |                     |                                                        |       |
| 48 |                     |                     |                                                        |       |
| 49 |                     |                     |                                                        |       |
| 50 |                     |                     |                                                        |       |
| 51 |                     |                     |                                                        |       |
| 52 | Roles and           | <a href="#">#5d</a> | Composition, roles, and responsibilities of the        | 3, 21 |
| 53 |                     |                     | coordinating centre, steering committee, endpoint      |       |
| 54 | responsibilities:   |                     | adjudication committee, data management team,          |       |
| 55 |                     |                     |                                                        |       |
| 56 | committees          |                     |                                                        |       |
| 57 |                     |                     |                                                        |       |
| 58 |                     |                     |                                                        |       |
| 59 |                     |                     |                                                        |       |
| 60 |                     |                     |                                                        |       |

and other individuals or groups overseeing the trial,  
if applicable (see Item 21a for data monitoring  
committee)

## Introduction

|                                                  |                     |                                                                                                                                                                                                            |    |
|--------------------------------------------------|---------------------|------------------------------------------------------------------------------------------------------------------------------------------------------------------------------------------------------------|----|
| Background and rationale                         | <a href="#">#6a</a> | Description of research question and justification for undertaking the trial, including summary of relevant studies (published and unpublished) examining benefits and harms for each intervention         | 5  |
| Background and rationale: choice of comparators  | <a href="#">#6b</a> | Explanation for choice of comparators                                                                                                                                                                      | 5  |
| Objectives                                       | <a href="#">#7</a>  | Specific objectives or hypotheses                                                                                                                                                                          | 6  |
| Trial design                                     | <a href="#">#8</a>  | Description of trial design including type of trial (eg, parallel group, crossover, factorial, single group), allocation ratio, and framework (eg, superiority, equivalence, non-inferiority, exploratory) | 12 |
| <b>Methods:</b>                                  |                     |                                                                                                                                                                                                            |    |
| <b>Participants, interventions, and outcomes</b> |                     |                                                                                                                                                                                                            |    |
| Study setting                                    | <a href="#">#9</a>  | Description of study settings (eg, community clinic, academic hospital) and list of countries where data will be collected. Reference to where list of study                                               | 11 |

|    |                      |                                                                             |        |
|----|----------------------|-----------------------------------------------------------------------------|--------|
| 1  |                      | sites can be obtained                                                       |        |
| 2  |                      |                                                                             |        |
| 3  |                      |                                                                             |        |
| 4  | Eligibility criteria | <a href="#">#10</a> Inclusion and exclusion criteria for participants. If   | 13,14  |
| 5  |                      | applicable, eligibility criteria for study centres and                      |        |
| 6  |                      | individuals who will perform the interventions (eg,                         |        |
| 7  |                      | surgeons, psychotherapists)                                                 |        |
| 8  |                      |                                                                             |        |
| 9  |                      |                                                                             |        |
| 10 |                      |                                                                             |        |
| 11 |                      |                                                                             |        |
| 12 |                      |                                                                             |        |
| 13 | Interventions:       | <a href="#">#11a</a> Interventions for each group with sufficient detail to | 8-10   |
| 14 | description          | allow replication, including how and when they will                         |        |
| 15 |                      | be administered                                                             |        |
| 16 |                      |                                                                             |        |
| 17 |                      |                                                                             |        |
| 18 |                      |                                                                             |        |
| 19 |                      |                                                                             |        |
| 20 |                      |                                                                             |        |
| 21 | Interventions:       | <a href="#">#11b</a> Criteria for discontinuing or modifying allocated      | n/a    |
| 22 | modifications        | interventions for a given trial participant (eg, drug                       |        |
| 23 |                      | dose change in response to harms, participant                               |        |
| 24 |                      | request, or improving / worsening disease)                                  |        |
| 25 |                      |                                                                             |        |
| 26 |                      |                                                                             |        |
| 27 |                      |                                                                             |        |
| 28 |                      |                                                                             |        |
| 29 |                      |                                                                             |        |
| 30 |                      |                                                                             |        |
| 31 | Interventions:       | <a href="#">#11c</a> Strategies to improve adherence to intervention        | 11, 16 |
| 32 | adherence            | protocols, and any procedures for monitoring                                |        |
| 33 |                      | adherence (eg, drug tablet return; laboratory tests)                        |        |
| 34 |                      |                                                                             |        |
| 35 |                      |                                                                             |        |
| 36 |                      |                                                                             |        |
| 37 |                      |                                                                             |        |
| 38 |                      |                                                                             |        |
| 39 | Interventions:       | <a href="#">#11d</a> Relevant concomitant care and interventions that       | 9,10   |
| 40 | concomitant care     | are permitted or prohibited during the trial                                |        |
| 41 |                      |                                                                             |        |
| 42 |                      |                                                                             |        |
| 43 |                      |                                                                             |        |
| 44 | Outcomes             | <a href="#">#12</a> Primary, secondary, and other outcomes, including       | 14-19  |
| 45 |                      | the specific measurement variable (eg, systolic                             |        |
| 46 |                      | blood pressure), analysis metric (eg, change from                           |        |
| 47 |                      | baseline, final value, time to event), method of                            |        |
| 48 |                      | aggregation (eg, median, proportion), and time point                        |        |
| 49 |                      | for each outcome. Explanation of the clinical                               |        |
| 50 |                      | relevance of chosen efficacy and harm outcomes is                           |        |
| 51 |                      |                                                                             |        |
| 52 |                      |                                                                             |        |
| 53 |                      |                                                                             |        |
| 54 |                      |                                                                             |        |
| 55 |                      |                                                                             |        |
| 56 |                      |                                                                             |        |
| 57 |                      |                                                                             |        |
| 58 |                      |                                                                             |        |
| 59 |                      |                                                                             |        |
| 60 |                      |                                                                             |        |

|    |                           |                                                                        |          |
|----|---------------------------|------------------------------------------------------------------------|----------|
| 1  |                           | strongly recommended                                                   |          |
| 2  |                           |                                                                        |          |
| 3  |                           |                                                                        |          |
| 4  | Participant timeline      | <a href="#">#13</a> Time schedule of enrolment, interventions          | Figure 1 |
| 5  |                           | (including any run-ins and washouts), assessments,                     |          |
| 6  |                           | and visits for participants. A schematic diagram is                    |          |
| 7  |                           | highly recommended (see Figure)                                        |          |
| 8  |                           |                                                                        |          |
| 9  |                           |                                                                        |          |
| 10 |                           |                                                                        |          |
| 11 |                           |                                                                        |          |
| 12 |                           |                                                                        |          |
| 13 | Sample size               | <a href="#">#14</a> Estimated number of participants needed to achieve | 14       |
| 14 |                           | study objectives and how it was determined,                            |          |
| 15 |                           | including clinical and statistical assumptions                         |          |
| 16 |                           | supporting any sample size calculations                                |          |
| 17 |                           |                                                                        |          |
| 18 |                           |                                                                        |          |
| 19 |                           |                                                                        |          |
| 20 |                           |                                                                        |          |
| 21 |                           |                                                                        |          |
| 22 |                           |                                                                        |          |
| 23 | Recruitment               | <a href="#">#15</a> Strategies for achieving adequate participant      | 11, 14   |
| 24 |                           | enrolment to reach target sample size                                  |          |
| 25 |                           |                                                                        |          |
| 26 |                           |                                                                        |          |
| 27 |                           |                                                                        |          |
| 28 |                           |                                                                        |          |
| 29 | <b>Methods:</b>           |                                                                        |          |
| 30 |                           |                                                                        |          |
| 31 | <b>Assignment of</b>      |                                                                        |          |
| 32 |                           |                                                                        |          |
| 33 | <b>interventions (for</b> |                                                                        |          |
| 34 |                           |                                                                        |          |
| 35 | <b>controlled trials)</b> |                                                                        |          |
| 36 |                           |                                                                        |          |
| 37 |                           |                                                                        |          |
| 38 |                           |                                                                        |          |
| 39 | Allocation:               | <a href="#">#16a</a> Method of generating the allocation sequence (eg, | 12       |
| 40 | sequence                  | computer-generated random numbers), and list of                        |          |
| 41 |                           | any factors for stratification. To reduce predictability               |          |
| 42 | generation                | of a random sequence, details of any planned                           |          |
| 43 |                           | restriction (eg, blocking) should be provided in a                     |          |
| 44 |                           | separate document that is unavailable to those who                     |          |
| 45 |                           | enrol participants or assign interventions                             |          |
| 46 |                           |                                                                        |          |
| 47 |                           |                                                                        |          |
| 48 |                           |                                                                        |          |
| 49 |                           |                                                                        |          |
| 50 |                           |                                                                        |          |
| 51 |                           |                                                                        |          |
| 52 |                           |                                                                        |          |
| 53 |                           |                                                                        |          |
| 54 |                           |                                                                        |          |
| 55 | Allocation                | <a href="#">#16b</a> Mechanism of implementing the allocation          | 12       |
| 56 |                           | sequence (eg, central telephone; sequentially                          |          |
| 57 | concealment               |                                                                        |          |
| 58 |                           |                                                                        |          |
| 59 |                           |                                                                        |          |
| 60 |                           |                                                                        |          |

|    |                        |                      |                                                        |                    |
|----|------------------------|----------------------|--------------------------------------------------------|--------------------|
| 1  | mechanism              |                      | numbered, opaque, sealed envelopes), describing        |                    |
| 2  |                        |                      |                                                        |                    |
| 3  |                        |                      | any steps to conceal the sequence until                |                    |
| 4  |                        |                      |                                                        |                    |
| 5  |                        |                      | interventions are assigned                             |                    |
| 6  |                        |                      |                                                        |                    |
| 7  |                        |                      |                                                        |                    |
| 8  | Allocation:            | <a href="#">#16c</a> | Who will generate the allocation sequence, who will    | 12                 |
| 9  |                        |                      |                                                        |                    |
| 10 | implementation         |                      | enrol participants, and who will assign participants   |                    |
| 11 |                        |                      |                                                        |                    |
| 12 |                        |                      | to interventions                                       |                    |
| 13 |                        |                      |                                                        |                    |
| 14 |                        |                      |                                                        |                    |
| 15 | Blinding (masking)     | <a href="#">#17a</a> | Who will be blinded after assignment to                | 23                 |
| 16 |                        |                      |                                                        |                    |
| 17 |                        |                      | interventions (eg, trial participants, care providers, |                    |
| 18 |                        |                      |                                                        |                    |
| 19 |                        |                      | outcome assessors, data analysts), and how             |                    |
| 20 |                        |                      |                                                        |                    |
| 21 |                        |                      |                                                        |                    |
| 22 |                        |                      |                                                        |                    |
| 23 | Blinding (masking):    | <a href="#">#17b</a> | If blinded, circumstances under which unblinding is    | n/a                |
| 24 |                        |                      |                                                        |                    |
| 25 | emergency              |                      | permissible, and procedure for revealing a             |                    |
| 26 |                        |                      |                                                        |                    |
| 27 | unblinding             |                      | participant's allocated intervention during the trial  |                    |
| 28 |                        |                      |                                                        |                    |
| 29 |                        |                      |                                                        |                    |
| 30 |                        |                      |                                                        |                    |
| 31 | <b>Methods: Data</b>   |                      |                                                        |                    |
| 32 |                        |                      |                                                        |                    |
| 33 | <b>collection,</b>     |                      |                                                        |                    |
| 34 |                        |                      |                                                        |                    |
| 35 | <b>management, and</b> |                      |                                                        |                    |
| 36 |                        |                      |                                                        |                    |
| 37 | <b>analysis</b>        |                      |                                                        |                    |
| 38 |                        |                      |                                                        |                    |
| 39 |                        |                      |                                                        |                    |
| 40 |                        |                      |                                                        |                    |
| 41 | Data collection plan   | <a href="#">#18a</a> | Plans for assessment and collection of outcome,        | Supplementary      |
| 42 |                        |                      |                                                        |                    |
| 43 |                        |                      | baseline, and other trial data, including any related  | file 1, 14,15, 17- |
| 44 |                        |                      |                                                        |                    |
| 45 |                        |                      | processes to promote data quality (eg, duplicate       | 19                 |
| 46 |                        |                      |                                                        |                    |
| 47 |                        |                      | measurements, training of assessors) and a             |                    |
| 48 |                        |                      |                                                        |                    |
| 49 |                        |                      | description of study instruments (eg,                  |                    |
| 50 |                        |                      |                                                        |                    |
| 51 |                        |                      | questionnaires, laboratory tests) along with their     |                    |
| 52 |                        |                      |                                                        |                    |
| 53 |                        |                      | reliability and validity, if known. Reference to where |                    |
| 54 |                        |                      |                                                        |                    |
| 55 |                        |                      | data collection forms can be found, if not in the      |                    |
| 56 |                        |                      |                                                        |                    |
| 57 |                        |                      |                                                        |                    |
| 58 |                        |                      |                                                        |                    |
| 59 |                        |                      |                                                        |                    |
| 60 |                        |                      |                                                        |                    |

|    |                            |                                                                             |        |
|----|----------------------------|-----------------------------------------------------------------------------|--------|
| 1  |                            | protocol                                                                    |        |
| 2  |                            |                                                                             |        |
| 3  |                            |                                                                             |        |
| 4  | Data collection plan:      | <a href="#">#18b</a> Plans to promote participant retention and complete    | 11     |
| 5  |                            |                                                                             |        |
| 6  | retention                  | follow-up, including list of any outcome data to be                         |        |
| 7  |                            |                                                                             |        |
| 8  |                            | collected for participants who discontinue or deviate                       |        |
| 9  |                            |                                                                             |        |
| 10 |                            | from intervention protocols                                                 |        |
| 11 |                            |                                                                             |        |
| 12 |                            |                                                                             |        |
| 13 | Data management            | <a href="#">#19</a> Plans for data entry, coding, security, and storage,    | 11, 21 |
| 14 |                            |                                                                             |        |
| 15 |                            | including any related processes to promote data                             |        |
| 16 |                            |                                                                             |        |
| 17 |                            | quality (eg, double data entry; range checks for data                       |        |
| 18 |                            |                                                                             |        |
| 19 |                            | values). Reference to where details of data                                 |        |
| 20 |                            |                                                                             |        |
| 21 |                            | management procedures can be found, if not in the                           |        |
| 22 |                            |                                                                             |        |
| 23 |                            | protocol                                                                    |        |
| 24 |                            |                                                                             |        |
| 25 |                            |                                                                             |        |
| 26 |                            |                                                                             |        |
| 27 |                            |                                                                             |        |
| 28 | Statistics: outcomes       | <a href="#">#20a</a> Statistical methods for analysing primary and          | 16, 20 |
| 29 |                            |                                                                             |        |
| 30 |                            | secondary outcomes. Reference to where other                                |        |
| 31 |                            |                                                                             |        |
| 32 |                            | details of the statistical analysis plan can be found,                      |        |
| 33 |                            |                                                                             |        |
| 34 |                            | if not in the protocol                                                      |        |
| 35 |                            |                                                                             |        |
| 36 |                            |                                                                             |        |
| 37 |                            |                                                                             |        |
| 38 | Statistics: additional     | <a href="#">#20b</a> Methods for any additional analyses (eg, subgroup      | 17     |
| 39 |                            |                                                                             |        |
| 40 | analyses                   | and adjusted analyses)                                                      |        |
| 41 |                            |                                                                             |        |
| 42 |                            |                                                                             |        |
| 43 | Statistics: analysis       | <a href="#">#20c</a> Definition of analysis population relating to protocol | 17     |
| 44 |                            |                                                                             |        |
| 45 | population and             | non-adherence (eg, as randomised analysis), and                             |        |
| 46 |                            |                                                                             |        |
| 47 | missing data               | any statistical methods to handle missing data (eg,                         |        |
| 48 |                            |                                                                             |        |
| 49 |                            | multiple imputation)                                                        |        |
| 50 |                            |                                                                             |        |
| 51 |                            |                                                                             |        |
| 52 |                            |                                                                             |        |
| 53 | <b>Methods: Monitoring</b> |                                                                             |        |
| 54 |                            |                                                                             |        |
| 55 |                            |                                                                             |        |
| 56 | Data monitoring:           | <a href="#">#21a</a> Composition of data monitoring committee (DMC);        | n/a    |
| 57 |                            |                                                                             |        |
| 58 |                            |                                                                             |        |
| 59 |                            |                                                                             |        |
| 60 |                            |                                                                             |        |

|    |                      |                      |                                                          |       |
|----|----------------------|----------------------|----------------------------------------------------------|-------|
| 1  | formal committee     |                      | summary of its role and reporting structure;             |       |
| 2  |                      |                      |                                                          |       |
| 3  |                      |                      | statement of whether it is independent from the          |       |
| 4  |                      |                      |                                                          |       |
| 5  |                      |                      | sponsor and competing interests; and reference to        |       |
| 6  |                      |                      |                                                          |       |
| 7  |                      |                      | where further details about its charter can be found,    |       |
| 8  |                      |                      |                                                          |       |
| 9  |                      |                      | if not in the protocol. Alternatively, an explanation of |       |
| 10 |                      |                      |                                                          |       |
| 11 |                      |                      | why a DMC is not needed                                  |       |
| 12 |                      |                      |                                                          |       |
| 13 |                      |                      |                                                          |       |
| 14 |                      |                      |                                                          |       |
| 15 | Data monitoring:     | <a href="#">#21b</a> | Description of any interim analyses and stopping         | n/a   |
| 16 |                      |                      |                                                          |       |
| 17 | interim analysis     |                      | guidelines, including who will have access to these      |       |
| 18 |                      |                      |                                                          |       |
| 19 |                      |                      | interim results and make the final decision to           |       |
| 20 |                      |                      |                                                          |       |
| 21 |                      |                      | terminate the trial                                      |       |
| 22 |                      |                      |                                                          |       |
| 23 |                      |                      |                                                          |       |
| 24 |                      |                      |                                                          |       |
| 25 | Harms                | <a href="#">#22</a>  | Plans for collecting, assessing, reporting, and          | 24,15 |
| 26 |                      |                      |                                                          |       |
| 27 |                      |                      | managing solicited and spontaneously reported            |       |
| 28 |                      |                      |                                                          |       |
| 29 |                      |                      | adverse events and other unintended effects of trial     |       |
| 30 |                      |                      |                                                          |       |
| 31 |                      |                      | interventions or trial conduct                           |       |
| 32 |                      |                      |                                                          |       |
| 33 |                      |                      |                                                          |       |
| 34 |                      |                      |                                                          |       |
| 35 | Auditing             | <a href="#">#23</a>  | Frequency and procedures for auditing trial              | n/a   |
| 36 |                      |                      |                                                          |       |
| 37 |                      |                      | conduct, if any, and whether the process will be         |       |
| 38 |                      |                      |                                                          |       |
| 39 |                      |                      | independent from investigators and the sponsor           |       |
| 40 |                      |                      |                                                          |       |
| 41 |                      |                      |                                                          |       |
| 42 | <b>Ethics and</b>    |                      |                                                          |       |
| 43 |                      |                      |                                                          |       |
| 44 | <b>dissemination</b> |                      |                                                          |       |
| 45 |                      |                      |                                                          |       |
| 46 |                      |                      |                                                          |       |
| 47 |                      |                      |                                                          |       |
| 48 | Research ethics      | <a href="#">#24</a>  | Plans for seeking research ethics committee /            | 3, 24 |
| 49 |                      |                      |                                                          |       |
| 50 | approval             |                      | institutional review board (REC / IRB) approval          |       |
| 51 |                      |                      |                                                          |       |
| 52 |                      |                      |                                                          |       |
| 53 | Protocol             | <a href="#">#25</a>  | Plans for communicating important protocol               |       |
| 54 |                      |                      |                                                          |       |
| 55 | amendments           |                      | modifications (eg, changes to eligibility criteria,      |       |
| 56 |                      |                      |                                                          |       |
| 57 |                      |                      | outcomes, analyses) to relevant parties (eg,             |       |
| 58 |                      |                      |                                                          |       |
| 59 |                      |                      |                                                          |       |
| 60 |                      |                      |                                                          |       |

|    |                       |                                                                            |            |
|----|-----------------------|----------------------------------------------------------------------------|------------|
| 1  |                       | investigators, REC / IRBs, trial participants, trial                       |            |
| 2  |                       | registries, journals, regulators)                                          |            |
| 3  |                       |                                                                            |            |
| 4  |                       |                                                                            |            |
| 5  |                       |                                                                            |            |
| 6  | Consent or assent     | <a href="#">#26a</a> Who will obtain informed consent or assent from       | 13, 14, 24 |
| 7  |                       | potential trial participants or authorised surrogates,                     |            |
| 8  |                       | and how (see Item 32)                                                      |            |
| 9  |                       |                                                                            |            |
| 10 |                       |                                                                            |            |
| 11 |                       |                                                                            |            |
| 12 |                       |                                                                            |            |
| 13 | Consent or assent:    | <a href="#">#26b</a> Additional consent provisions for collection and use  | n/a        |
| 14 | ancillary studies     | of participant data and biological specimens in                            |            |
| 15 |                       | ancillary studies, if applicable                                           |            |
| 16 |                       |                                                                            |            |
| 17 |                       |                                                                            |            |
| 18 |                       |                                                                            |            |
| 19 |                       |                                                                            |            |
| 20 |                       |                                                                            |            |
| 21 | Confidentiality       | <a href="#">#27</a> How personal information about potential and           | 28         |
| 22 |                       | enrolled participants will be collected, shared, and                       |            |
| 23 |                       | maintained in order to protect confidentiality before,                     |            |
| 24 |                       | during, and after the trial                                                |            |
| 25 |                       |                                                                            |            |
| 26 |                       |                                                                            |            |
| 27 |                       |                                                                            |            |
| 28 |                       |                                                                            |            |
| 29 |                       |                                                                            |            |
| 30 |                       |                                                                            |            |
| 31 | Declaration of        | <a href="#">#28</a> Financial and other competing interests for principal  | 28         |
| 32 | interests             | investigators for the overall trial and each study site                    |            |
| 33 |                       |                                                                            |            |
| 34 |                       |                                                                            |            |
| 35 |                       |                                                                            |            |
| 36 | Data access           | <a href="#">#29</a> Statement of who will have access to the final trial   | 28         |
| 37 |                       | dataset, and disclosure of contractual agreements                          |            |
| 38 |                       | that limit such access for investigators                                   |            |
| 39 |                       |                                                                            |            |
| 40 |                       |                                                                            |            |
| 41 |                       |                                                                            |            |
| 42 |                       |                                                                            |            |
| 43 |                       |                                                                            |            |
| 44 | Ancillary and post    | <a href="#">#30</a> Provisions, if any, for ancillary and post-trial care, | n/a        |
| 45 | trial care            | and for compensation to those who suffer harm                              |            |
| 46 |                       | from trial participation                                                   |            |
| 47 |                       |                                                                            |            |
| 48 |                       |                                                                            |            |
| 49 |                       |                                                                            |            |
| 50 |                       |                                                                            |            |
| 51 | Dissemination         | <a href="#">#31a</a> Plans for investigators and sponsor to communicate    | 24         |
| 52 | policy: trial results | trial results to participants, healthcare professionals,                   |            |
| 53 |                       | the public, and other relevant groups (eg, via                             |            |
| 54 |                       |                                                                            |            |
| 55 |                       |                                                                            |            |
| 56 |                       |                                                                            |            |
| 57 |                       |                                                                            |            |
| 58 |                       |                                                                            |            |
| 59 |                       |                                                                            |            |
| 60 |                       |                                                                            |            |



publication, reporting in results databases, or other  
 data sharing arrangements), including any  
 publication restrictions

Dissemination [#31b](#) Authorship eligibility guidelines and any intended n/a  
 policy: authorship use of professional writers

Dissemination [#31c](#) Plans, if any, for granting public access to the full 28  
 policy: reproducible protocol, participant-level dataset, and statistical  
 research code

## Appendices

Informed consent [#32](#) Model consent form and other related n/a  
 materials documentation given to participants and authorised  
 surrogates

Biological [#33](#) Plans for collection, laboratory evaluation, and n/a  
 specimens storage of biological specimens for genetic or  
 molecular analysis in the current trial and for future  
 use in ancillary studies, if applicable

None The SPIRIT checklist is distributed under the terms of the Creative Commons Attribution  
 License CC-BY-ND 3.0. This checklist can be completed online using <https://www.goodreports.org/>, a  
 tool made by the [EQUATOR Network](#) in collaboration with [Penelope.ai](#)
